# Supplementary material
Source: publisher figshare collection journal article supplement (https://gsajournals.figshare.com/articles/dataset/_/9250682)
Supplement: Supplementary file 1 [file 1]

## Sheet: Table S1
Table S1 Joint QTL mapping results for all 22 traits in TeoNAM.
Trait	QTL	DF	SS	MS	FValue	ProbF	R2	Selected marker	chr	QTL position (cM)	Support interval (cM)	QTL Peak (AGP V4) (Mb)	Support interval (AGP V4) (Mb)
ASI	ASI1.1	5	272.144	54.4288	15.9161	3.33597e-15	0.0439025	S1_234121590	1	111.4	110.3 - 113.1	237.7	234.3 - 244
ASI	ASI2.1	5	134.457	26.8915	7.86362	2.68871e-07	0.0216908	S2_54987202	2	75.7	58.8 - 85.8	57	30.1 - 148.6
ASI	ASI3.1	5	126.658	25.3316	7.40749	7.47603e-07	0.0204326	S3_6519021	3	27.4	16.6 - 38.9	5.7	2.8 - 9.7
ASI	ASI3.2	5	213.621	42.7242	12.4934	7.69005e-12	0.0344615	S3_176332401	3	96.9	89.9 - 99	178.9	168 - 181
ASI	ASI4.1	5	149.433	29.8867	8.73949	3.74827e-08	0.0241067	S4_74639721	4	63.9	57.1 - 74.8	77.4	38 - 158.5
ASI	ASI8.1	5	127.33	25.4661	7.44681	6.84599e-07	0.020541	S8_170277737	8	120.6	111.5 - 132	175.5	172.7 - 178.1
ASI	ASI9.1	5	107.573	21.5146	6.29132	9.00122e-06	0.0173538	S9_76796966	9	63.7	56 - 66	79.9	25.9 - 99.1
ASI	ASI9.2	5	199.702	39.9404	11.6794	4.86157e-11	0.0322161	S9_136904615	9	89.6	84 - 90.8	139.5	135.6 - 140.1
ASI	ASI10.1	5	219.605	43.9209	12.8434	3.48082e-12	0.0354268	S10_91357728	10	54.1	50.7 - 56.6	91.6	79.5 - 107.1
ASI	pop	4	212.062	53.0154	15.5028	2.27457e-12	0.03421
ASI	Model	49	2122.51	43.3165	12.6666	8.39339e-78	0.342405
ASI	Error	1192	4076.32	3.41973			0.657595
ASI	Corrected Total	1241	6198.83
BARE	BARE1.1	5	10.8179	2.16357	8.82664	3.0833e-08	0.0189325	S1_231389724	1	110.7	100.1 - 118.4	235	211.3 - 255.3
BARE	BARE2.1	5	8.92235	1.78447	7.28003	9.95145e-07	0.0156151	S2_4178553	2	14.3	2.7 - 17.6	4.1	1.9 - 4.9
BARE	BARE2.2	5	8.79856	1.75971	7.17903	1.24728e-06	0.0153985	S2_216847900	2	134.7	125.2 - 136.2	223.6	218.3 - 225.2
BARE	BARE4.1	5	32.1196	6.42393	26.2074	3.56697e-25	0.0562131	S4_8621402	4	26.2	26.2 - 26.4	9.4	9.4 - 10.4
BARE	BARE4.2	5	8.52423	1.70485	6.95519	2.05618e-06	0.0149184	S4_28829798	4	52.8	52 - 55.9	30.4	28.4 - 36.6
BARE	BARE4.3	5	9.3309	1.86618	7.61338	4.71753e-07	0.0163302	S4_53678226	4	61.5	58.2 - 66.8	55.9	39 - 124.3
BARE	BARE5.1	5	15.4715	3.09431	12.6237	5.73854e-12	0.027077	S5_148700093	5	84.8	83.6 - 91.1	152.3	146 - 170.9
BARE	BARE10.1	5	13.2758	2.65516	10.8321	3.31757e-10	0.0232342	S10_89062847	10	53.7	53.3 - 56.2	89.2	88 - 103.8
BARE	pop	4	9.56393	2.39098	9.7544	9.16641e-08	0.016738
BARE	Model	44	280.19	6.36796	25.9791	2.17359e-142	0.490365
BARE	Error	1188	291.201	0.245119			0.509635
BARE	Corrected Total	1232	571.391
CULM	CULM1.1	4	329.756	82.439	14.9702	6.88004e-12	0.03604	S1_198542135	1	93.8	83.8 - 95.6	201	174.8 - 204.2
CULM	CULM2.1	4	230.897	57.7241	10.4822	2.54499e-08	0.0252354	S2_16773977	2	46.1	42.9 - 62.6	18	15.1 - 34.6
CULM	CULM2.2	4	442.034	110.508	20.0674	6.53834e-16	0.0483112	S2_180157584	2	95.2	93 - 96.4	185.6	88.5 - 191.3
CULM	CULM3.1	4	146.521	36.6303	6.65174	2.77166e-05	0.0160137	S3_147406232	3	82.5	60.5 - 94.6	148.7	26.7 - 174.8
CULM	CULM5.1	4	262.513	65.6282	11.9175	1.83405e-09	0.0286908	S5_56426644	5	73.3	69.7 - 75.4	58.2	35.1 - 69
CULM	CULM6.1	4	166.109	41.5274	7.54101	5.50879e-06	0.0181546	S6_88742765	6	34.4	22.8 - 42.7	91.3	33.2 - 99.6
CULM	CULM6.2	4	204.96	51.2399	9.30473	2.19891e-07	0.0224006	S6_147023354	6	81.5	72.6 - 92.2	151.1	136.8 - 159.5
CULM	CULM7.1	4	199.764	49.9411	9.06887	3.38555e-07	0.0218328	S7_13171380	7	42.3	38.9 - 47.6	13.6	10.4 - 18.1
CULM	pop	3	285.927	95.309	17.3073	5.82536e-11	0.0312498
CULM	Model	35	3642.85	104.081	18.9003	7.86159e-87	0.398138
CULM	Error	1000	5506.87	5.50687			0.601862
CULM	Corrected Total	1035	9149.72
DTA	DTA1.1	5	692.92	138.584	17.3895	1.2596e-16	0.0241398	S1_4358833	1	9	3.4 - 13.2	4.5	2.8 - 5.6
DTA	DTA1.2	5	556.685	111.337	13.9705	2.79295e-13	0.0193937	S1_160123916	1	80.8	78.9 - 83.1	161.6	122.7 - 172.2
DTA	DTA1.3	5	703.861	140.772	17.6641	6.7988e-17	0.024521	S1_285078282	1	151.6	151.3 - 152.5	290.2	290.2 - 291.1
DTA	DTA2.1	5	412.195	82.4389	10.3444	1.01476e-09	0.01436	S2_21514825	2	50.2	50.2 - 57.3	22.8	22.8 - 29
DTA	DTA2.2	5	300.264	60.0528	7.53541	5.6598e-07	0.0104605	S2_216847900	2	134.7	128.2 - 138.6	223.6	220.6 - 225.2
DTA	DTA3.1	5	578.033	115.607	14.5063	8.32954e-14	0.0201374	S3_159799846	3	87.4	84.5 - 90.6	161.4	155.2 - 168.8
DTA	DTA3.2	5	394.551	78.9102	9.90164	2.75864e-09	0.0137453	S3_198216153	3	117.5	112.1 - 122.8	201.3	193.5 - 205.4
DTA	DTA3.3	5	345.063	69.0127	8.65969	4.53626e-08	0.0120213	S3_227478537	3	167.2	156.7 - 170	231.4	226.3 - 233.4
DTA	DTA4.1	5	382.927	76.5853	9.60991	5.32926e-09	0.0133403	S4_179648273	4	89.8	85.7 - 94.8	182.6	176.6 - 188.4
DTA	DTA4.2	5	246.191	49.2383	6.17841	1.16233e-05	0.00857677	S4_231205029	4	123.7	108.9 - 138.2	236.3	205.5 - 241.6
DTA	DTA5.1	5	761.722	152.344	19.1161	2.62335e-18	0.0265367	S5_6683468	5	30.7	29.2 - 31.5	6.9	6.7 - 7.2
DTA	DTA5.2	5	480.141	96.0283	12.0496	2.14793e-11	0.0167271	S5_100701772	5	80.3	75.4 - 78.2	103.2	69 - 103.2
DTA	DTA6.1	5	419.878	83.9756	10.5372	6.56359e-10	0.0146276	S6_88065996	6	33.5	24.2 - 34.1	90.9	37.3 - 91.2
DTA	DTA6.2	5	935.627	187.125	23.4805	1.58876e-22	0.0325952	S6_130527829	6	70.2	69 - 73.3	134.6	134 - 137.9
DTA	DTA7.1	5	311.356	62.2712	7.81377	3.03379e-07	0.010847	S7_111802231	7	63.4	61.9 - 73.8	115.1	111.5 - 134.1
DTA	DTA7.2	5	596.564	119.313	14.9714	2.91608e-14	0.020783	S7_174794655	7	140.7	139.3 - 141.8	180.4	180.1 - 180.8
DTA	DTA8.1	5	2320.33	464.065	58.2308	4.05141e-54	0.0808351	S8_123512155	8	68.3	68.2 - 68.3	126.9	126.6 - 126.9
DTA	DTA9.1	5	1379.59	275.918	34.6222	4.75797e-33	0.048062	S9_114160249	9	72.9	72.4 - 74.6	117.5	115.7 - 118.8
DTA	DTA10.1	5	5855.57	1171.11	146.951	9.28736e-121	0.203995	S10_95126088	10	54.7	54.3 - 55.1	95.4	94.9 - 99.4
DTA	pop	4	439.377	109.844	13.7832	5.5178e-11	0.0153069
DTA	Model	99	19515.7	197.128	24.7356	3.47104e-221	0.679885
DTA	Error	1153	9188.73	7.96941			0.320115
DTA	Corrected Total	1252	28704.4
DTS	DTS1.1	5	707.748	141.55	12.8823	3.30295e-12	0.0184704	S1_6157227	1	15	8.7 - 17.4	6.2	4.3 - 6.9
DTS	DTS1.2	5	506.065	101.213	9.21128	1.31663e-08	0.013207	S1_120848546	1	78.9	79.5 - 81.9	122.7	61.9 - 161.6
DTS	DTS1.3	5	373.281	74.6562	6.79438	2.96891e-06	0.0097417	S1_183811521	1	89.1	83.8 - 95.6	185.9	174.8 - 204.2
DTS	DTS1.4	5	1183.95	236.79	21.55	1.18444e-20	0.0308981	S1_231389724	1	110.7	110.3 - 111.9	235	211.3 - 255.3
DTS	DTS1.5	5	894.48	178.896	16.2811	1.5495e-15	0.0233437	S1_285078282	1	151.6	151.3 - 152.5	290.2	290.2 - 291.1
DTS	DTS2.1	5	531.894	106.379	9.68141	4.56226e-09	0.0138811	S2_168935361	2	90.9	79.4 - 95.7	173.8	69.8 - 186.1
DTS	DTS2.2	5	316.305	63.2611	5.75732	2.95113e-05	0.00825477	S2_218463051	2	136.2	125.2 - 139.3	225.2	218.3 - 226.9
DTS	DTS3.1	5	757.126	151.425	13.781	4.33832e-13	0.0197591	S3_198140104	3	117.3	112.8 - 120.2	201.2	194.5 - 203.1
DTS	DTS4.1	5	571.853	114.371	10.4087	8.83581e-10	0.0149239	S4_216370019	4	114.7	108.9 - 118.8	220.5	205.5 - 231.3
DTS	DTS5.1	5	517.312	103.462	9.416	8.30033e-09	0.0135005	S5_4876721	5	22.5	21.6 - 31.2	5	4.7 - 7.1
DTS	DTS5.2	5	394.785	78.9571	7.1858	1.24072e-06	0.0103029	S5_150578346	5	85.2	74.2 - 88.5	154.2	61.8 - 166.7
DTS	DTS6.1	5	648.293	129.659	11.8001	3.81048e-11	0.0169188	S6_68994246	6	28.4	21.9 - 37.3	71.9	30.8 - 93.9
DTS	DTS6.2	5	969.135	193.827	17.64	7.32171e-17	0.025292	S6_143865315	6	79.9	78.4 - 82.7	147.9	146.6 - 151.8
DTS	DTS7.1	5	404.126	80.8251	7.35581	8.48703e-07	0.0105467	S7_117543615	7	64.5	40.5 - 71.9	121.2	11.3 - 131.8
DTS	DTS7.2	5	598.065	119.613	10.8859	3.00761e-10	0.015608	S7_174574340	7	140.2	137.5 - 146.2	180.1	179.8 - 182.4
DTS	DTS8.1	5	1996.49	399.299	36.3397	1.32712e-34	0.0521034	S8_130101268	8	70.9	70.4 - 71.6	134	132.5 - 135.5
DTS	DTS8.2	5	374.308	74.8616	6.81308	2.8479e-06	0.0097685	S8_164862658	8	101.8	94.8 - 103.4	170	166.9 - 170.4
DTS	DTS9.1	5	359.752	71.9505	6.54814	5.13293e-06	0.00938863	S9_23466465	9	54.3	50.9 - 64.6	23.3	20.7 - 91.5
DTS	DTS9.2	5	1740.25	348.05	31.6757	2.82732e-30	0.0454162	S9_125171314	9	79	77.7 - 80.8	127.2	124.8 - 130.4
DTS	DTS10.1	5	7315.37	1463.07	133.153	3.64399e-111	0.190913	S10_91357728	10	54.1	53.3 - 54.1	91.6	79.5 - 107.1
DTS	pop	4	683.003	170.751	15.5398	2.19869e-12	0.0178247
DTS	Model	104	25824.6	248.313	22.5987	7.25578e-211	0.673957
DTS	Error	1137	12493.3	10.9879
DTS	Corrected Total	1241	38317.9
EB	EB4.1	5	0.763868	0.152774	11.9185	2.76163e-11	0.00823512	S4_38236496	4	58.8	57.1 - 58.4	39.9	38 - 39.9
EB	EB7.1	5	0.941257	0.188251	14.6863	5.1791e-14	0.0101475	S7_117848213	7	64.8	60.1 - 72.7	121.5	103.9 - 132.7
EB	pop	4	52.3489	13.0872	1020.99	0	0.564363
EB	Model	14	76.8757	5.49112	428.385	0	0.828782
EB	Error	1239	15.8817	0.0128182			0.171218
EB	Corrected Total	1253	92.7574				1
ED	ED1.1	5	841.078	168.216	24.2447	3.17309e-23	0.0373278	S1_36222263	1	56	52.1 - 59.5	35.5	33.6 - 40.6
ED	ED1.2	5	373.818	74.7637	10.7756	3.88975e-10	0.0165904	S1_231389724	1	110.7	110.3 - 113.3	235	211.3 - 255.3
ED	ED1.3	5	223.641	44.7281	6.44661	6.4482e-06	0.00992538	S1_272337167	1	134.7	127.6 - 141.3	277.1	265.1 - 283.1
ED	ED2.1	5	226.649	45.3298	6.53333	5.31955e-06	0.0100589	S2_2261249	2	5.5	0 - 9	2.2	0 - 2.7
ED	ED2.2	5	322.362	64.4725	9.29234	1.10341e-08	0.0143067	S2_9423557	2	30.8	22 - 39.7	9.6	6 - 13.1
ED	ED2.3	5	320.007	64.0014	9.22445	1.2857e-08	0.0142022	S2_180157584	2	95.2	79.4 - 100.5	185.6	69.8 - 191.8
ED	ED2.4	5	249.63	49.9259	7.19577	1.21766e-06	0.0110788	S2_210383244	2	123.3	116.8 - 133.5	217.2	211.9 - 223.4
ED	ED3.1	4	276.385	55.277	7.96701	2.16932e-07	0.0122662	S3_6520792	3	27.6	16.6 - 33.2	5.7	2.8 - 8.1
ED	ED3.2	5	496.303	99.2606	14.3063	1.34498e-13	0.0220264	S3_214795183	3	140.1	133.8 - 142.3	218.4	214.8 - 219.8
ED	ED4.1	5	423.877	84.7753	12.2186	1.49555e-11	0.018812	S4_6946235	4	23.8	21.5 - 30.1	7.8	6.8 - 11.1
ED	ED4.2	5	938.59	187.718	27.0556	6.7015e-26	0.0416555	S4_36381485	4	57.1	55.2 - 57.1	38	34.4 - 38
ED	ED5.1	5	251.889	50.3779	7.2609	1.0529e-06	0.0111791	S5_12032940	5	44.9	41.7 - 48.6	12.5	10.7 - 14.1
ED	ED5.2	5	294.055	58.811	8.47637	6.91692e-08	0.0130504	S5_38013865	5	70.5	67.3 - 74.2	39.4	29.6 - 61.8
ED	ED5.3	5	671.578	134.316	19.3587	1.6033e-18	0.0298052	S5_167670487	5	91.6	91.6 - 92.4	171.6	171.6 - 172.8
ED	ED6.1	5	282.481	56.4962	8.14273	1.46285e-07	0.0125368	S6_147716960	6	82.7	73.7 - 87.2	151.8	138.9 - 156.7
ED	ED6.2	5	357.787	71.5575	10.3135	1.10377e-09	0.0158789	S6_159562173	6	101.3	98.2 - 102.4	163.7	162.5 - 164.1
ED	ED7.1	5	475.112	95.0223	13.6955	5.33312e-13	0.0210859	S7_92336552	7	58.6	55.4 - 61	95.2	35.5 - 108.9
ED	ED7.2	5	700.677	140.135	20.1976	2.47177e-19	0.0310967	S7_158159780	7	98	94.1 - 98.4	163.6	160.4 - 164.2
ED	ED8.1	5	305.344	61.0689	8.80178	3.32842e-08	0.0135515	S8_132880097	8	72.2	72 - 75.4	136.9	136.4 - 145.9
ED	ED8.2	5	323.011	64.6022	9.31104	1.05789e-08	0.0143355	S8_163715532	8	98	92.7 - 105.8	168.7	165.3 - 170.9
ED	ED9.1	5	497.761	99.5522	14.3483	1.22344e-13	0.0220911	S9_20870270	9	50.5	46.1 - 59	20.7	18.8 - 30.8
ED	ED9.2	5	317.399	63.4797	9.14926	1.52287e-08	0.0140864	S9_136558678	9	88.6	84.9 - 92.3	139.1	136.3 - 140.8
ED	ED10.1	5	679.79	135.958	19.5955	9.45505e-19	0.0301697	S10_118927301	10	60.2	58.5 - 60.4	120	115 - 120.2
ED	Model	115	14761.4	128.36	18.5003	3.16427e-189	0.655124
ED	Error	1120	7770.83	6.93824
ED	Corrected Total	1235	22532.2
EL	EL1.1	5	209.965	41.9931	17.4011	1.18462e-16	0.0378694	S1_208529727	1	100.3	96.5 - 102.3	211.5	206.5 - 214.3
EL	EL1.2	5	90.9368	18.1874	7.5365	5.61028e-07	0.0164014	S1_285125030	1	151.7	143.7 - 158	290.3	284.8 - 294.1
EL	EL2.1	5	70.6496	14.1299	5.85517	2.36524e-05	0.0127424	S2_21904836	2	51.1	49.5 - 75.7	23.2	21.7 - 57
EL	EL3.1	5	72.3908	14.4782	5.99948	1.71977e-05	0.0130564	S3_55445743	3	67.7	61.7 - 81.4	55.4	28.8 - 141.6
EL	EL3.2	5	110.634	22.1268	9.16891	1.42705e-08	0.019954	S3_214859599	3	140.4	131 - 143.8	218.5	212.6 - 220.6
EL	EL4.1	5	190.291	38.0582	15.7706	4.67296e-15	0.0343209	S4_53678226	4	61.5	59.1 - 63.9	55.9	39 - 124.3
EL	EL5.1	5	196.307	39.2613	16.2691	1.51739e-15	0.0354059	S5_67041678	5	75.4	73.3 - 76.8	69	36 - 140.7
EL	EL6.1	5	104.299	20.8598	8.64391	4.66053e-08	0.0188114	S6_28142393	6	21.5	18 - 33.2	29.7	18.7 - 89.6
EL	EL6.2	5	99.3656	19.8731	8.23504	1.16963e-07	0.0179216	S6_133324354	6	73.1	69.3 - 83.6	137.4	134.1 - 152.8
EL	EL7.1	5	214.987	42.9975	17.8173	4.64496e-17	0.0387752	S7_121544914	7	66.8	65.7 - 70.5	125.5	123.7 - 130.3
EL	EL8.1	5	143.823	28.7645	11.9195	2.83584e-11	0.0259399	S8_151913854	8	82.5	78.1 - 83.4	156.5	150.4 - 157.6
EL	EL8.2	5	68.4848	13.697	5.67576	3.51232e-05	0.012352	S8_172756635	8	132	120.4 - 132.3	178.1	175.5 - 178.1
EL	EL9.1	5	66.1199	13.224	5.47976	5.40388e-05	0.0119254	S9_76796966	9	63.7	56 - 68.1	79.9	25.9 - 99.1
EL	EL10.1	5	506.724	101.345	41.9954	6.86809e-40	0.091393	S10_114029187	10	58.5	58.8 - 60	115	115 - 118.9
EL	Model	70	2689.59	38.4228	15.9217	1.08724e-125	0.485096
EL	Error	1183	2854.86	2.41324
EL	Corrected Total	1253	5544.45
GLCO	GLCO2.1	5	84.8145	16.9629	70.0382	1.88106e-64	0.161652	S2_86246951	2	81.9	81.9 - 83.8	88.5	56.8 - 181.9
GLCO	GLCO2.2	5	13.0691	2.61382	10.7922	3.59305e-10	0.024909	S2_220646894	2	140	138.4 - 144.8	227.4	226.5 - 231
GLCO	GLCO2.3	5	16.9732	3.39465	14.0162	2.40934e-13	0.0323502	S2_236484920	2	173.1	165.9 - 173.8	240.7	240.6 - 244.4
GLCO	GLCO4.1	5	30.158	6.03159	24.9039	5.97507e-24	0.0574796	S4_40345170	4	59.6	58.2 - 59.6	42.1	39 - 42.1
GLCO	GLCO6.1	5	13.6135	2.7227	11.2418	1.29732e-10	0.0259467	S6_125190350	6	65.5	53 - 76.1	129.1	113 - 143.8
GLCO	GLCO7.1	5	10.2134	2.04268	8.43405	7.41814e-08	0.0194663	S7_172936723	7	132.5	125.6 - 134.7	177.9	176.6 - 179.2
GLCO	GLCO8.1	5	11.9314	2.38628	9.85271	3.0145e-09	0.0227406	S8_163181187	8	97.4	89 - 105.1	168.2	164 - 170.8
GLCO	GLCO9.1	5	9.35478	1.87096	7.725	3.65357e-07	0.0178298	S9_23450646	9	53.8	51.1 - 63.7	23.3	21.3 - 79.9
GLCO	Model	40	230.89	5.77225	23.8331	2.5895e-124	0.440065
GLCO	Error	1213	293.782	0.242195
GLCO	Corrected Total	1253	524.672
GLUM	GLUM1.1	5	33.5698	6.71396	19.1246	2.48439e-18	0.0312121	S1_272041860	1	134.4	132.3 - 134.9	276.8	273.8 - 277.1
GLUM	GLUM2.1	5	12.7681	2.55362	7.27395	1.01069e-06	0.0118714	S2_4676366	2	17.1	9 - 22.7	4.6	2.7 - 6.1
GLUM	GLUM2.2	5	13.0033	2.60067	7.40796	7.48896e-07	0.0120901	S2_189637422	2	105.3	101.3 - 121.2	195.4	192.2 - 215.8
GLUM	GLUM3.1	5	14.5288	2.90576	8.27701	1.06564e-07	0.0135084	S3_16572379	3	49.4	43.2 - 74.4	15.9	11.5 - 94.3
GLUM	GLUM3.2	5	10.3718	2.07436	5.90878	2.1026e-05	0.00964335	S3_217358612	3	145.1	127.4 - 150.5	221	210.1 - 223.2
GLUM	GLUM4.1	5	393.905	78.781	224.406	2.56995e-168	0.366239	S4_40345170	4	59.6	59.1 - 61.5	42.1	40.4 - 55.9
GLUM	GLUM4.2	5	13.2618	2.65236	7.55519	5.38583e-07	0.0123303	S4_199076926	4	107.9	105.3 - 116.6	203.4	199.3 - 227
GLUM	GLUM5.1	5	11.8938	2.37876	6.77587	3.07204e-06	0.0110585	S5_30775902	5	68	59.1 - 73.3	31.7	19.6 - 58.2
GLUM	GLUM7.1	5	11.7147	2.34294	6.67381	3.85582e-06	0.0108919	S7_133178346	7	77.1	73.6 - 83.3	137.3	134 - 143
GLUM	GLUM8.1	5	14.7098	2.94196	8.38012	8.4507e-08	0.0136767	S8_149610651	8	80.7	78.1 - 93.2	154.1	150.4 - 166
GLUM	GLUM10.1	5	9.30923	1.86185	5.30343	7.95757e-05	0.0086554	S10_102875245	10	56.1	40.1 - 64.8	103.4	14.2 - 131.3
GLUM	pop	4	35.3636	8.8409	25.1832	4.86482e-20	0.0328799
GLUM	Model	59	661.986	11.2201	31.9603	3.59046e-202	0.615492
GLUM	Error	1178	413.553	0.351064
GLUM	Corrected Total	1237	1075.54
KRN	KRN1.1	5	82.5507	16.5101	14.7249	5.17514e-14	0.0245711	S1_34322037	1	53.2	51.5 - 54.1	34.7	32.9 - 35.3
KRN	KRN1.2	5	92.8219	18.5644	16.557	8.36932e-16	0.0276283	S1_203713807	1	96.5	96.5 - 98.2	206.5	206.5 - 208.9
KRN	KRN1.3	5	95.6178	19.1236	17.0558	2.72989e-16	0.0284605	S1_292990325	1	165.6	164.9 - 168.2	298.5	298.1 - 299.6
KRN	KRN2.1	5	49.3867	9.87733	8.80931	3.25913e-08	0.0146999	S2_3095749	2	9.7	3.9 - 13.2	3.1	2.1 - 3.8
KRN	KRN2.2	5	125.317	25.0634	22.3534	2.00873e-21	0.0373005	S2_22039929	2	51.2	46.9 - 54	23.3	18.6 - 25
KRN	KRN2.3	5	54.9024	10.9805	9.79317	3.55108e-09	0.0163416	S2_186186144	2	100.5	92.5 - 102.8	191.8	179.5 - 193.7
KRN	KRN3.1	5	47.6063	9.52126	8.49174	6.65675e-08	0.01417	S3_13992180	3	47.5	46.4 - 49.2	13.3	12.4 - 15.4
KRN	KRN3.2	5	31.0052	6.20105	5.53054	4.86057e-05	0.00922867	S3_178049636	3	98.7	82.5 - 99	180.8	148.7 - 181
KRN	KRN3.3	5	116.657	23.3315	20.8087	6.20124e-20	0.0347229	S3_217293422	3	144.6	142.3 - 144.6	220.9	219.8 - 220.9
KRN	KRN4.1	5	39.8624	7.97249	7.11043	1.46913e-06	0.011865	S4_7313082	4	25.3	23.1 - 33.2	8.1	7.3 - 12.4
KRN	KRN4.2	5	124.999	24.9998	22.2966	2.27794e-21	0.0372058	S4_199076926	4	107.9	104.3 - 108.2	203.4	196.2 - 204.1
KRN	KRN4.3	5	41.3062	8.26124	7.36796	8.26658e-07	0.0122947	S4_238218823	4	145.6	137.4 - 152.1	243.5	241.6 - 244.8
KRN	KRN5.1	5	81.2526	16.2505	14.4934	8.72324e-14	0.0241847	S5_2333282	5	12.7	11.7 - 15	2.4	2.3 - 2.9
KRN	KRN5.2	5	43.002	8.6004	7.67045	4.20214e-07	0.0127995	S5_12273089	5	45.3	41.7 - 53.2	12.7	10.7 - 16.1
KRN	KRN5.3	5	90.7108	18.1422	16.1805	1.95154e-15	0.027	S5_168865188	5	92.4	89.5 - 95.6	172.8	167.8 - 176.7
KRN	KRN5.4	5	31.6757	6.33514	5.65013	3.73777e-05	0.00942823	S5_212766997	5	152.8	147.3 - 158.8	218.6	217.2 - 220
KRN	KRN6.1	5	44.6491	8.92981	7.96425	2.17558e-07	0.0132897	S6_92994825	6	38.1	36.7 - 43.9	95.6	92 - 100.8
KRN	KRN6.2	5	40.7788	8.15576	7.27389	1.02001e-06	0.0121378	S6_155210643	6	92	83.6 - 99.5	159.3	152.8 - 162.8
KRN	KRN7.1	5	64.6497	12.9299	11.5319	7.00172e-11	0.0192429	S7_92336552	7	58.6	49.6 - 65.7	95.2	21.5 - 123.7
KRN	KRN7.2	5	56.1833	11.2367	10.0217	2.12073e-09	0.0167229	S7_155907893	7	94.8	89.9 - 100.2	161.3	152.4 - 165.3
KRN	KRN8.1	5	51.3311	10.2662	9.15615	1.49277e-08	0.0152786	S8_132880097	8	72.2	67.5 - 74.9	136.9	123.9 - 144.4
KRN	KRN8.2	5	76.1861	15.2372	13.5896	6.70368e-13	0.0226767	S8_166079457	8	106.8	100.8 - 113	171.3	169.6 - 173.4
KRN	KRN9.1	5	48.5714	9.71428	8.66389	4.52037e-08	0.0144572	S9_15693060	9	40	32.5 - 50.5	15.4	12.1 - 20.7
KRN	KRN10.1	5	75.6629	15.1326	13.4963	8.27589e-13	0.022521	S10_63249655	10	47.7	46.8 - 54.1	62.5	25.3 - 82.1
KRN	Model	120	2089.3	17.4108	15.5282	1.56282e-168	0.621878
KRN	Error	1133	1270.36	1.12124
KRN	Corrected Total	1253	3359.66
KW	KW1.1	5	0.0582796	0.0116559	24.4801	1.76703e-23	0.0412615	S1_34997527	1	54.5	52.1 - 57.4	35.3	33.6 - 38.9
KW	KW1.2	5	0.0251816	0.00503632	10.5774	6.0073e-10	0.0178284	S1_230797791	1	110.3	106.5 - 116.4	234.3	222.8 - 252.5
KW	KW2.1	5	0.0291988	0.00583976	12.2648	1.32419e-11	0.0206725	S2_51241334	2	74.3	64.3 - 76.1	53.3	36.9 - 57.5
KW	KW2.2	5	0.0270717	0.00541434	11.3713	9.98433e-11	0.0191666	S2_188367754	2	103	98.7 - 117.9	194	190.4 - 212.9
KW	KW3.1	5	0.0202457	0.00404914	8.50411	6.44651e-08	0.0143338	S3_16572379	3	49.4	47 - 57.4	15.9	11.5 - 18.9
KW	KW4.1	5	0.0728241	0.0145648	30.5894	2.82911e-29	0.051559	S4_37297564	4	58.2	57.1 - 59.6	39	38 - 42.1
KW	KW4.2	5	0.0216623	0.00433245	9.09913	1.68895e-08	0.0153367	S4_167185554	4	82.8	73.6 - 84.2	170.1	156.8 - 174.8
KW	KW5.1	5	0.0229401	0.00458803	9.6359	5.03491e-09	0.0162414	S5_12032940	5	44.9	40.2 - 47.9	12.5	10.5 - 14
KW	KW5.2	5	0.020642	0.00412841	8.67059	4.43289e-08	0.0146144	S5_53534605	5	72.7	71.1 - 76.3	55.2	43.5 - 72.7
KW	KW5.3	5	0.0148755	0.00297511	6.2484	9.96191e-06	0.0105318	S5_172017239	5	95.2	89.5 - 102.8	176.1	167.8 - 187.4
KW	KW6.1	5	0.0253841	0.00507683	10.6625	4.95667e-10	0.0179718	S6_130527829	6	70.2	68 - 79.9	134.6	133.9 - 147.9
KW	KW6.2	5	0.0155932	0.00311864	6.54986	5.10412e-06	0.0110399	S6_164577110	6	117.1	104.2 - 130.4	168.7	164.3 - 173.3
KW	KW7.1	5	0.0171495	0.00342989	7.20355	1.18988e-06	0.0121417	S7_134846474	7	78.5	74.3 - 83.3	138.9	132.1 - 143
KW	KW7.2	5	0.0238839	0.00477678	10.0323	2.05785e-09	0.0169096	S7_166524115	7	113.3	107.9 - 119.5	172.1	169.5 - 174
KW	KW8.1	5	0.0316328	0.00632656	13.2872	1.31285e-12	0.0223958	S8_133837804	8	72.7	70.4 - 75.4	137.7	132.5 - 145.9
KW	KW8.2	5	0.029466	0.00589319	12.377	1.02744e-11	0.0208617	S8_163715532	8	98	97.4 - 98.9	168.7	166.5 - 170.9
KW	KW9.1	5	0.0171713	0.00343427	7.21274	1.1657e-06	0.0121572	S9_18849058	9	46.1	44.4 - 50.5	18.8	17.8 - 20.7
KW	KW9.2	5	0.0355439	0.00710879	14.9301	3.21506e-14	0.0251649	S9_120513408	9	76.6	75.2 - 80.8	122.3	120.1 - 130.4
KW	KW10.1	5	0.0370941	0.00741881	15.5812	7.40706e-15	0.0262623	S10_87818593	10	53.3	50.7 - 54.7	88	62.5 - 88
KW	pop	4	0.0162139	0.00405347	8.5132	9.05743e-07	0.0114793
KW	Model	99	0.865836	0.00874582	18.3682	6.47055e-175	0.613006
KW	Error	1148	0.546608	0.000476139
KW	Corrected Total	1247	1.41244
LFLN	LFLN1.1	3	858.412	286.137	11.605	1.94926e-07	0.0225938	S1_269037990	1	132.3	129.5 - 137.7	273.8	269.8 - 279.9
LFLN	LFLN2.1	3	788.865	262.955	10.6648	7.22819e-07	0.0207633	S2_36548245	2	64.6	60 - 78.5	38	30.7 - 63.4
LFLN	LFLN3.1	3	1008.17	336.056	13.6295	1.16809e-08	0.0265355	S3_7937912	3	30.8	29.8 - 31.7	7.1	6.3 - 7.3
LFLN	LFLN3.2	3	2937.19	979.064	39.7083	8.90018e-24	0.0773084	S3_114883730	3	76.7	71.9 - 77.2	115.2	112.5 - 120.2
LFLN	LFLN5.1	3	1601.62	533.873	21.6525	1.92329e-13	0.0421554	S5_7120890	5	32	29.6 - 34.3	7.4	6.7 - 7.8
LFLN	LFLN6.1	3	674.466	224.822	9.11818	6.26013e-06	0.0177523	S6_4350564	6	13.5	0 - 24	4.4	0.2 - 36.5
LFLN	LFLN6.2	3	1050.32	350.107	14.1994	5.30067e-09	0.027645	S6_151564360	6	85.8	78.9 - 87.6	155.7	146.7 - 157.3
LFLN	LFLN7.1	3	1617.05	539.016	21.8611	1.44931e-13	0.0425615	S7_120711648	7	66.2	65.2 - 71.1	124.5	122.2 - 130.9
LFLN	LFLN8.1	3	694.714	231.571	9.39192	4.2713e-06	0.0182852	S8_14613030	8	33.8	25.8 - 59.5	15	10.8 - 101.1
LFLN	LFLN9.1	3	1313.57	437.856	17.7583	3.91238e-11	0.0345737	S9_105082333	9	69.9	63.7 - 77.1	108.4	79.9 - 123.7
LFLN	LFLN10.1	3	2629.09	876.363	35.543	1.90136e-21	0.069199	S10_86124047	10	52.4	52 - 53	86.2	84.1 - 87.2
LFLN	pop	2	681.885	340.943	13.8277	1.27542e-06	0.0179476
LFLN	Model	35	19994	571.257	23.1687	3.21219e-95	0.526252
LFLN	Error	730	17999.2	24.6564
LFLN	Corrected Total	765	37993.2
LFWD	LFWD1.1	3	32.3928	10.7976	16.303	2.87065e-10	0.0399287	S1_191619355	1	91.2	84.9 - 94.8	193.9	176.4 - 202.7
LFWD	LFWD1.2	3	22.7334	7.57781	11.4415	2.43705e-07	0.0280222	S1_285923960	1	152.5	145.4 - 165.6	291.1	285.8 - 298.5
LFWD	LFWD2.1	3	18.8164	6.27213	9.47012	3.81806e-06	0.0231939	S2_180193653	2	95.4	90.9 - 96.4	185.6	173.8 - 187.2
LFWD	LFWD5.1	3	46.6189	15.5396	23.4629	1.63109e-14	0.0574644	S5_67041678	5	75.4	72.7 - 83.6	69	36 - 140.7
LFWD	LFWD6.1	3	16.7163	5.5721	8.41317	1.67185e-05	0.0206052	S6_111144861	6	56.8	40.4 - 60.2	115.3	98.3 - 119.3
LFWD	LFWD6.2	3	25.363	8.45435	12.765	3.85942e-08	0.0312635	S6_142825732	6	79.4	78.4 - 80.9	146.9	146.6 - 150.3
LFWD	LFWD6.3	3	20.1823	6.72743	10.1576	1.46173e-06	0.0248775	S6_164557883	6	116.8	105.6 - 123.9	168.7	164.8 - 170.7
LFWD	LFWD9.1	3	20.4422	6.81407	10.2884	1.2177e-06	0.0251979	S9_137552733	9	91.1	87.6 - 104.4	140.1	138.7 - 147.9
LFWD	pop	2	39.1749	19.5874	29.5745	4.40633e-13	0.0482886
LFWD	Model	26	321.821	12.3777	18.6888	2.16143e-64	0.39669
LFWD	Error	739	489.445	0.662307
LFWD	Corrected Total	765	811.266
PLHT	PLHT1.1	3	7839.24	2613.08	9.87053	2.18165e-06	0.0153004	S1_188559281	1	90.4	83.8 - 100.3	190.8	174.8 - 211.5
PLHT	PLHT2.1	3	7931.76	2643.92	9.98702	1.85408e-06	0.015481	S2_86246951	2	81.9	75.3 - 93	88.5	56.8 - 181.9
PLHT	PLHT3.1	3	11046.1	3682.03	13.9084	7.8785e-09	0.0215595	S3_181559455	3	103.1	100.3 - 106.7	184.5	182.2 - 188.7
PLHT	PLHT5.1	3	11613.5	3871.16	14.6227	2.92622e-09	0.0226669	S5_6569642	5	30	22.3 - 32.2	6.9	4.9 - 7.4
PLHT	PLHT8.1	3	18478.5	6159.49	23.2666	2.12241e-14	0.0360657	S8_119052428	8	66.8	66.2 - 69.3	122.1	120.9 - 128
PLHT	PLHT9.1	3	11771.7	3923.91	14.822	2.22055e-09	0.0229757	S9_76796966	9	63.7	56 - 68.1	79.9	25.9 - 99.1
PLHT	PLHT10.1	3	13518.8	4506.26	17.0217	1.0651e-10	0.0263856	S10_87818593	10	53.3	47.7 - 53.3	88	62.5 - 88
PLHT	pop	2	34252.4	17126.2	64.6918	1.28087e-26	0.0668529
PLHT	Model	23	316451	13758.7	51.9716	1.9327e-137	0.61764
PLHT	Error	740	195904	264.735
PLHT	Corrected Total	763	512355
PROL	PROL1.1	3	18.0206	6.00687	102.105	1.02416e-54	0.271887	S1_23240587	1	41.1	40.8 - 42.2	23.6	23.6 - 24.7
PROL	PROL2.1	3	2.44449	0.814831	13.8505	8.85441e-09	0.0368814	S2_8951512	2	28.7	22 - 37	9.1	6 - 12
PROL	PROL3.1	3	3.96145	1.32048	22.4456	7.07838e-14	0.0597685	S3_214859599	3	140.4	137 - 145.1	218.5	212.6 - 220.6
PROL	PROL5.1	3	1.94932	0.649774	11.0449	4.33508e-07	0.0294105	S5_30775902	5	68	63.5 - 69.3	31.7	20.2 - 55.2
PROL	Model	12	25.6281	2.13567	36.3022	1.69111e-65	0.386665
PROL	Error	691	40.6518	0.0588304
PROL	Corrected Total	703	66.2799
REPE	REPE1.1	5	5.05549	1.0111	11.932	2.7067e-11	0.0342908	S1_46679103	1	64.9	64.4 - 68.3	47	46.5 - 51.8
REPE	REPE2.1	5	3.76138	0.752275	8.87762	2.72536e-08	0.025513	S2_202635915	2	113.4	103.6 - 128.2	209.2	194.5 - 220.6
REPE	REPE4.1	5	5.90342	1.18068	13.9333	2.89686e-13	0.0400423	S4_74639721	4	63.9	61.5 - 63.9	77.4	38 - 158.5
REPE	REPE4.2	5	4.12513	0.825025	9.73615	3.91734e-09	0.0279803	S4_185648981	4	96.2	95.3 - 97.4	189.1	188.8 - 189.5
REPE	REPE6.1	5	3.50792	0.701583	8.2794	1.04954e-07	0.0237938	S6_34568041	6	23.4	21.5 - 33.5	36.1	29.7 - 90.9
REPE	REPE6.2	5	12.6967	2.53934	29.9669	8.65851e-29	0.0861206	S6_143865315	6	79.9	79.3 - 80.3	147.9	146.6 - 151.8
REPE	REPE9.1	5	3.4582	0.69164	8.16206	1.36674e-07	0.0234566	S9_11451789	9	28.7	20.5 - 31.8	10.9	7.8 - 11.8
REPE	Model	35	44.2183	1.26338	14.9092	1.60874e-71	0.299928
REPE	Error	1218	103.211	0.0847384
REPE	Corrected Total	1253	147.43
SHN	SHN1.1	5	6.40468	1.28094	16.9852	3.20999e-16	0.0529152	S1_260514645	1	127.6	127.2 - 127.6	265.1	264.1 - 265.1
SHN	SHN2.1	5	3.85713	0.771426	10.2291	1.3295e-09	0.0318675	S2_209131855	2	122	117.6 - 124.3	216	212.8 - 218
SHN	SHN3.1	5	4.03241	0.806483	10.694	4.65484e-10	0.0333157	S3_181546904	3	102.6	102.4 - 107.5	184.5	184 - 189
SHN	SHN4.1	5	2.77257	0.554514	7.35286	8.55583e-07	0.0229069	S4_20405938	4	45.7	41.6 - 52	21.7	18.7 - 28.4
SHN	SHN5.1	5	11.4876	2.29752	30.4651	3.95225e-29	0.0949101	S5_16217080	5	54.4	52.8 - 55.5	16.8	16 - 17.7
SHN	SHN6.1	5	4.46501	0.893002	11.8412	3.48635e-11	0.0368898	S6_158283365	6	98.2	97.4 - 101.1	162.5	162.2 - 163.6
SHN	Model	30	35.8178	1.19393	15.8315	1.56843e-66	0.295926
SHN	Error	1130	85.2187	0.0754148
SHN	Corrected Total	1160	121.037
STAM	STAM1.1	5	2.47952	0.495905	10.9587	2.44806e-10	0.032417	S1_51406288	1	68.3	62.7 - 75.6	51.8	45.2 - 73.4
STAM	STAM1.2	5	6.5025	1.3005	28.7391	1.2326e-27	0.0850128	S1_265652759	1	130.2	129.5 - 130.2	270.5	269.8 - 270.5
STAM	STAM3.1	5	2.56993	0.513985	11.3583	9.89363e-11	0.0335989	S3_156638721	3	86	81.4 - 86.5	158.3	141.6 - 159.3
STAM	STAM3.2	5	1.67387	0.334774	7.39801	7.58433e-07	0.021884	S3_171437102	3	94	93.6 - 94.9	174.1	173.5 - 175.1
STAM	STAM7.1	5	2.25007	0.450015	9.94465	2.43565e-09	0.0294172	S7_132818317	7	76.5	69.1 - 78.8	136.9	129.5 - 139.6
STAM	Model	25	20.9191	0.836763	18.4912	2.11991e-68	0.273493
STAM	Error	1228	55.5694	0.0452519
STAM	Corrected Total	1253	76.4885
TBN	TBN1.1	5	1304.14	260.828	10.2914	1.13036e-09	0.021037	S1_15075522	1	32.4	29.4 - 34.2	15.3	12.7 - 17.2
TBN	TBN1.2	5	823.726	164.745	6.50032	5.66779e-06	0.0132874	S1_61138920	1	73.9	69.7 - 78.9	61.9	53.4 - 122.7
TBN	TBN2.1	5	1658.7	331.739	13.0894	2.00693e-12	0.0267563	S2_145026464	2	86.3	78.5 - 91.4	149.6	63.4 - 174.6
TBN	TBN4.1	5	1129.95	225.99	8.91683	2.52043e-08	0.0182271	S4_145731921	4	70.7	69.1 - 70.9	149.1	141.3 - 149.7
TBN	TBN5.1	5	1715.81	343.163	13.5401	7.23563e-13	0.0276776	S5_165652108	5	90.6	85.5 - 94.9	169.5	154.3 - 175.3
TBN	TBN6.1	5	1001.08	200.215	7.89984	2.48433e-07	0.0161483	S6_116772617	6	60.7	53 - 62.9	120.7	113 - 124.5
TBN	TBN6.2	5	2728.34	545.667	21.5303	1.14089e-20	0.0440105	S6_165487792	6	120.6	118.9 - 122.3	169.6	169.2 - 170
TBN	TBN7.1	5	1029.96	205.993	8.12781	1.4888e-07	0.0166142	S7_109539027	7	62.9	61 - 67.8	112.7	108.9 - 127.7
TBN	TBN7.2	5	745.529	149.106	5.88324	2.22347e-05	0.0120261	S7_134846474	7	78.5	72.5 - 83.3	138.9	132.1 - 143
TBN	TBN7.3	5	709.563	141.913	5.59941	4.15519e-05	0.0114459	S7_151730848	7	91.3	89.6 - 92.5	157.1	152.3 - 158.5
TBN	TBN8.1	5	1456.14	291.229	11.491	7.48677e-11	0.0234889	S8_17425203	8	39.9	34.3 - 45.7	18	15.2 - 22.4
TBN	TBN10.1	5	906.063	181.213	7.15007	1.33214e-06	0.0146156	S10_141252193	10	84.6	72.7 - 93.5	142	136.5 - 144.5
TBN	pop	4	1768.11	442.026	17.4409	6.48474e-14	0.0285211
TBN	Model	64	32036	500.562	19.7506	6.78603e-144	0.516769
TBN	Error	1182	29956.8	25.3442
TBN	Corrected Total	1246	61992.8
TILN	TILN1.1	5	32.8239	6.56479	26.4416	2.3057e-25	0.0360498	S1_17886317	1	35.7	35 - 37.4	18.2	18 - 20
TILN	TILN1.2	5	16.6741	3.33481	13.4319	9.39939e-13	0.0183128	S1_120848546	1	78.9	73.9 - 80.8	122.7	61.9 - 161.6
TILN	TILN1.3	5	15.5366	3.10732	12.5156	7.46445e-12	0.0170635	S1_258553443	1	126	125.8 - 130.5	263.2	263.1 - 270.9
TILN	TILN2.1	5	16.9637	3.39274	13.6652	5.54664e-13	0.0186309	S2_28672359	2	58.4	50.8 - 59.4	30.1	23.1 - 30.5
TILN	TILN2.2	5	25.4729	5.09458	20.5199	1.1308e-19	0.0279763	S2_181419503	2	96.1	94.5 - 97.7	186.9	184.9 - 188.9
TILN	TILN2.3	5	8.43001	1.686	6.79085	2.98128e-06	0.0092585	S2_230941765	2	155.6	153.9 - 164.3	238	237.4 - 240.5
TILN	TILN3.1	5	8.62934	1.72587	6.95143	2.08457e-06	0.00947743	S3_8265531	3	32.1	29.4 - 37.4	7.4	6.1 - 9.4
TILN	TILN3.2	5	31.0625	6.21251	25.0226	5.21847e-24	0.0341153	S3_137580513	3	80.5	80.2 - 86.2	138.3	137.6 - 158.6
TILN	TILN3.3	5	15.7415	3.14831	12.6807	5.13819e-12	0.0172886	S3_210673608	3	133.1	131.3 - 134.9	214.3	212.7 - 215.7
TILN	TILN4.1	5	15.0966	3.01932	12.1612	1.66416e-11	0.0165803	S4_179804005	4	90.4	84.7 - 95.5	182.8	175.2 - 188.8
TILN	TILN5.1	5	13.0718	2.61435	10.53	6.65666e-10	0.0143564	S5_67041678	5	75.4	69.9 - 82.7	69	36 - 140.7
TILN	TILN5.2	5	9.9767	1.99534	8.0368	1.83727e-07	0.0109572	S5_206920133	5	135.7	131.5 - 143.8	212.6	210.9 - 215.7
TILN	TILN6.1	5	19.023	3.8046	15.3241	1.30986e-14	0.0208926	S6_16291417	6	18	15.9 - 24.2	18.7	7.4 - 37.3
TILN	TILN7.1	5	16.2663	3.25327	13.1035	1.97516e-12	0.017865	S7_5797588	7	28.3	27.2 - 29.6	6.1	5.8 - 6.5
TILN	TILN7.2	5	8.99607	1.79921	7.24684	1.07804e-06	0.00988019	S7_11140878	7	40.8	40.8 - 43.6	11.5	11.5 - 14.4
TILN	TILN8.1	5	37.8468	7.56937	30.4878	3.4021e-29	0.0415664	S8_131529321	8	71.6	70.4 - 72.7	135.5	132.5 - 137.7
TILN	TILN10.1	5	17.1295	3.42591	13.7988	4.10129e-13	0.018813	S10_63249655	10	47.7	45 - 51.1	62.5	25.3 - 82.1
TILN	TILN10.2	5	9.75718	1.95144	7.85997	2.73205e-07	0.0107161	S10_142076674	10	87.4	83.4 - 99.8	142.9	141.7 - 146.2
TILN	pop	4	67.4357	16.8589	67.9041	1.1494e-51	0.0740632
TILN	Model	94	623.013	6.62779	26.6953	4.95402e-228	0.684242
TILN	Error	1158	287.503	0.248275
TILN	Corrected Total	1252	910.516
YEPE	YEPE1.1	5	4.53253	0.906506	7.27725	1.00115e-06	0.0158288	S1_84746044	1	77	72.7 - 77	86.5	57.3 - 86.5
YEPE	YEPE2.1	5	4.03623	0.807245	6.48041	5.91797e-06	0.0140956	S2_214924652	2	130.2	112.6 - 134.7	221.8	207.4 - 223.6
YEPE	YEPE3.1	5	8.24882	1.64976	13.244	1.40777e-12	0.0288071	S3_4540484	3	19.4	15.1 - 23.2	3.8	2.7 - 4.5
YEPE	YEPE3.2	5	4.16239	0.832478	6.68297	3.77136e-06	0.0145362	S3_159868843	3	88	80.5 - 91.4	161.5	138.3 - 169.7
YEPE	YEPE4.1	5	4.99734	0.999469	8.02354	1.87875e-07	0.0174521	S4_23361982	4	49.3	45.7 - 51.5	24.8	21.7 - 27.9
YEPE	YEPE5.1	5	5.2981	1.05962	8.50642	6.3416e-08	0.0185024	S5_9622026	5	37.7	31.2 - 44.9	10	7.1 - 12.5
YEPE	YEPE6.1	5	20.4756	4.09512	32.8748	1.74238e-31	0.0715063	S6_85519512	6	32	30.2 - 32.6	88.3	81.8 - 89.1
YEPE	YEPE6.2	5	4.42744	0.885487	7.10852	1.45986e-06	0.0154618	S6_106063654	6	50.1	49.1 - 68.3	109.4	108.2 - 134
YEPE	YEPE7.1	5	4.84406	0.968812	7.77744	3.26465e-07	0.0169168	S7_13984289	7	43.6	38.2 - 45.2	14.4	9.8 - 15
YEPE	YEPE7.2	5	3.9908	0.798161	6.40748	6.9587e-06	0.013937	S7_119922678	7	65.7	62.4 - 75.1	123.7	112 - 135.3
YEPE	YEPE9.1	5	4.91588	0.983176	7.89275	2.52023e-07	0.0171676	S9_119969428	9	76.1	72.4 - 80.3	121.7	115.7 - 128.9
YEPE	YEPE10.1	5	9.80221	1.96044	15.738	5.00094e-15	0.0342319	S10_87091592	10	53	50.1 - 57.1	87.2	78.5 - 109.8
YEPE	pop	4	4.9066	1.22665	9.8473	7.7226e-08	0.0171352
YEPE	Model	64	138.237	2.15995	17.3396	2.82235e-128	0.482759
YEPE	Error	1189	148.11	0.124567
YEPE	Corrected Total	1253	286.347

## Sheet: Table S2
Table S2 GWAS results for all 22 traits in TeoNAM.
Trait	Marker	Chr	Position (V4) (bp)	P value	Overlapped with JLM
ASI	S1_232329924	1	235934799	9.5688e-08	ASI1.1
BARE	S4_9485629	4	10384896	1.292e-12	BARE4.1
BARE	S5_147630730	5	151142384	7.0871e-07	BARE5.1
DTA	S1_3136025	1	3230143	2.9767e-09	DTA1.1
DTA	S1_27626796	1	27817904	2.7982e-06
DTA	S1_131818795	1	134234077	8.9038e-06	DTA1.2
DTA	S1_198469111	1	200941623	4.0482e-07
DTA	S1_228554983	1	232168716	4.3981e-09
DTA	S1_285536206	1	290676835	2.5696e-11	DTA1.3
DTA	S2_17862428	2	19078932	1.8897e-07
DTA	S3_6300063	3	5496074	3.3565e-07
DTA	S4_183227302	4	186604306	3.7351e-06	DTA4.1
DTA	S4_195800713	4	200056397	7.4332e-06
DTA	S5_194166596	5	199617510	4.0419e-07
DTA	S7_132519774	7	136612964	1.1022e-07	DTA7.1
DTA	S8_123512191	8	126891660	5.9548e-07	DTA8.1
DTA	S9_113060314	9	116432176	2.4816e-07	DTA9.1
DTA	S10_94588804	10	94800489	8.7682e-18	DTA10.1
DTS	S1_3136025	1	3230143	8.5038e-07	DTS1.1
DTS	S1_26820060	1	27044246	2.5608e-06
DTS	S1_198469111	1	200941623	1.1585e-07	DTS1.3
DTS	S1_228554983	1	232168716	4.906e-07	DTS1.4
DTS	S1_239117603	1	242703708	5.6321e-06	DTS1.4
DTS	S1_285536206	1	290676835	7.0039e-11	DTS1.5
DTS	S2_17862428	2	19078932	8.0786e-06
DTS	S5_208985356	5	214780280	1.8364e-07
DTS	S7_174806773	7	180369411	9.7963e-07	DTS7.2
DTS	S9_127968406	9	130209374	6.7781e-06	DTS9.2
DTS	S10_91960032	10	92160414	3.1175e-18	DTS10.1
EB	S1_228554983	1	232168716	1.2611e-85
EB	S2_3181687	2	3197316	1.725e-06
EB	S2_17862428	2	19078932	6.3484e-70
EB	S3_6300061	3	5496072	7.9979e-61
EB	S3_34948370	3	34652831	8.8548e-06
EB	S3_58652113	3	58652320	1.1544e-17
EB	S4_27096969	4	28606587	5.5103e-22
EB	S4_38026759	4	39729835	3.2055e-06	EB4.1
EB	S5_7997109	5	8364780	3.4337e-08
EB	S5_183492905	5	188151205	2.029e-19
EB	S5_215358874	5	221215017	1.1266e-61
EB	S6_36947830	6	38683769	6.3535e-32
EB	S6_106763941	6	110138472	2.2769e-29
EB	S7_163575449	7	169093382	2.7412e-47
EB	S8_85309836	8	86967638	7.2863e-57
EB	S8_117899720	8	120809850	2.1215e-14
EB	S8_143309520	8	147566060	1.1905e-22
EB	S9_110568977	9	113502173	1.8958e-31
EB	S9_121052615	9	122923531	1.1581e-41
EB	S9_135853649	9	138406666	1.4249e-12
EB	S10_143442348	10	144152820	5.3016e-07
ED	S1_5337008	1	5423079	6.3473e-07
ED	S1_33630314	1	33950460	3.8573e-06	ED1.1
ED	S1_195418611	1	197777627	1.4197e-10
ED	S1_232329924	1	235934799	1.7032e-07	ED1.2
ED	S1_259948000	1	264635440	3.5879e-09	ED1.3
ED	S3_133782319	3	134442048	1.2084e-06
ED	S3_175542557	3	178100006	5.1482e-06
ED	S4_7256504	4	8102304	3.2114e-06	ED4.1
ED	S4_183700694	4	187092612	4.9361e-06
ED	S4_236412358	4	241643447	2.4522e-06
ED	S5_4584672	5	4690715	3.6329e-08
ED	S5_137898216	5	141254189	7.9529e-09
ED	S5_166930455	5	170837056	1.7506e-06	ED5.3
ED	S5_194564397	5	199885878	4.6767e-10
ED	S5_216733845	5	222662830	9.9278e-08
ED	S6_137651626	6	141974167	3.5855e-06	ED6.1
ED	S7_2176529	7	2291913	1.8281e-09
ED	S7_21800968	7	22847550	2.9904e-07
ED	S7_95533877	7	98540968	5.271e-07	ED7.1
ED	S7_136573106	7	141403054	1.8863e-07
ED	S7_144503568	7	149427566	2.5215e-07
ED	S7_157468981	7	162876158	1.3231e-06	ED7.2
ED	S7_174806773	7	180369411	2.8231e-07
ED	S9_132884946	9	135295336	8.9841e-06	ED9.2
ED	S10_7667719	10	7577054	1.1495e-07
ED	S10_117855785	10	118923641	4.198e-07	ED10.1
ED	S10_146170722	10	146944992	1.5724e-06
EL	S1_201485074	1	203991732	4.5698e-06
EL	S1_296960058	1	302443498	2.5454e-07
EL	S3_10070133	3	9363695	1.6409e-06
EL	S4_2831484	4	3409041	3.7188e-06
EL	S5_197781425	5	203051821	8.9372e-07
EL	S7_10556943	7	10839332	2.4637e-07
EL	S9_11779932	9	11224013	3.1778e-06
EL	S9_152461021	9	155603624	1.7674e-06
EL	S10_114190121	10	115197811	1.617e-13	EL10.1
GLCO	S2_111581465	2	114835808	4.2259e-08	GLCO2.1
GLCO	S2_236188850	2	244255388	3.8523e-09	GLCO2.3
GLCO	S4_41837128	4	43591292	4.5822e-09	GLCO4.1
GLUM	S1_270670153	1	275431743	2.0318e-09	GLUM1.1
GLUM	S2_10502494	2	10620652	6.4558e-06
GLUM	S4_44461135	4	46292947	2.157e-25	GLUM4.1
GLUM	S5_91600729	5	93945344	1.0638e-08
KRN	S1_3438554	1	3531653	1.4806e-06
KRN	S1_5636343	1	5706302	2.4516e-06
KRN	S1_205242719	1	208073479	2.4977e-06	KRN1.2
KRN	S5_208918752	5	214713994	3.2565e-07
KRN	S7_2176529	7	2291913	9.6734e-09
KRN	S7_176015114	7	181617692	2.1673e-06
KRN	S10_6066420	10	5744155	1.9685e-07
KW	S1_197584247	1	200033200	5.1252e-08
KW	S1_277140168	1	282125089	3.7439e-07
KW	S4_41460607	4	43204049	9.0378e-09	KW4.1
KW	S4_153847579	4	157424829	5.0428e-07	KW4.2
KW	S8_100160562	8	102168115	5.7065e-06
KW	S9_126935953	9	128992398	8.1823e-06	KW9.2
KW	S9_153610593	9	156771467	5.2913e-06
KW	S10_94588804	10	94800489	2.3159e-06
LFLN	S3_7747842	3	6900551	2.5794e-06	LFLN3.1
LFWD	S7_8701435	7	8987209	2.3504e-06
PLHT	S1_228554983	1	232168716	8.0064e-09
PLHT	S2_3181687	2	3197316	8.9579e-06
PLHT	S2_233632567	2	240517714	7.9291e-06
PLHT	S3_6300061	3	5496072	1.3544e-09
PLHT	S6_3988910	6	4038583	4.0329e-06
PLHT	S7_163575449	7	169093382	2.3805e-06
PLHT	S8_100160562	8	102168115	5.7576e-09
PLHT	S9_121052615	9	122923531	4.2056e-10
PROL	S1_23234114	1	23618793	8.327e-19	PROL1.1
PROL	S10_110200969	10	111054145	1.539e-06
REPE	S6_124804662	6	128728264	9.9208e-06
REPE	S6_143295638	6	147378161	1.9166e-08	REPE6.2
REPE	S9_135855887	9	138409016	3.2638e-07
SHN	S1_259947998	1	264635438	8.5501e-07	SHN1.1
SHN	S5_16844921	5	17460539	1.4138e-09	SHN5.1
SHN	S6_158283373	6	162458391	6.5193e-07	SHN6.1
STAM	S1_239612660	1	243205142	1.5523e-08
STAM	S1_262999014	1	267909815	5.7591e-10	STAM1.2
STAM	S3_156482556	3	158099043	5.2727e-08	STAM3.1
STAM	S3_171901917	3	174366791	2.4495e-07	STAM3.2
STAM	S6_2058809	6	2043969	3.8687e-06
STAM	S7_133158462	7	137262008	4.9215e-06	STAM7.1
TBN	S6_165490122	6	169628169	1.5706e-06	TBN6.2
TBN	S7_176015114	7	181617692	1.0707e-07
TILN	S1_17886361	1	18190791	2.2069e-06	TILN1.1
TILN	S1_228554983	1	232168716	1.2994e-21
TILN	S2_233632567	2	240517714	3.2332e-28	TILN2.3
TILN	S3_6300061	3	5496072	1.3476e-13	TILN3.1
TILN	S4_27096969	4	28606587	5.3907e-09
TILN	S5_215358874	5	221215017	9.2153e-14
TILN	S6_36947830	6	38683769	4.9808e-12	TILN6.1
TILN	S6_106763941	6	110138472	1.4603e-13
TILN	S7_6069563	7	6437452	3.6555e-06	TILN7.1
TILN	S7_131437329	7	135469653	2.0036e-12
TILN	S8_85309836	8	86967638	4.6091e-19
TILN	S9_110568977	9	113502173	4.6775e-12
TILN	S9_121052615	9	122923531	1.3846e-06
TILN	S9_135853649	9	138406666	1.5095e-11
YEPE	S6_78830290	6	81821604	3.5373e-08	YEPE6.1
YEPE	S10_20319286	10	20834406	1.2552e-06

## Sheet: Table S3
Table S3 Separate QTL mapping results for all 22 traits in TeoNAM.
Population	Trait	QTL	QTL_chr	QTL_pos (cM)	qtl.lod	qtl.r2	qtl.add	qtl.dom	add.pvalue	dom.pvalue	1.5-LOD Support interval (cM)	2-LOD Support interval (cM)	QTL Peak (AGP V4) (Mb)	2-LOD Support interval (AGP V4) (Mb)	Overlapped with JLM
W22×TIL14	ASI	1@110.7	1	110.717	6.35504	11.997	-2.2218	0.947326	3.87946e-07	0.18497	109.6 - 112.5	109 - 113.3	234.7	229.8 - 244.1	ASI1.1
W22×TIL11	ASI	1@111.1	1	111.126	5.41701	9.81213	-0.901944	-0.35453	9.36e-06	0.47769	108.8 - 113.6	107.7 - 113.6	236.1	226.9 - 244.4	ASI1.1
W22×TIL25	ASI	1@129.2	1	129.237	5.86779	5.89571	-1.11868	1.30795	4.96955e-07	0.0012777	125.8 - 130.4	121.2 - 133	269.1	257.8 - 274.8
W22×TIL25	ASI	2@42.9	2	42.9173	7.35927	7.47801	0.794817	-0.388722	9.79242e-09	0.316789	42 - 43.9	41.8 - 44.6	15.1	14.7 - 16.4
W22×TIL11	ASI	2@104.0	2	103.989	5.04475	9.10133	0.628406	0.680505	2.78e-05	0.141551	98.7 - 105.2	96.8 - 106.2	194.5	187.7 - 195.9
W22×TIL25	ASI	3@96.8	3	96.7602	13.0419	13.8384	1.41941	-0.136942	2.72182e-13	0.749177	96.5 - 98.8	95.5 - 98.9	178.9	175.9 - 180.9	ASI3.2
W22×TIL03	ASI	4@58.9	4	58.9284	4.97659	8.22547	0.731153	0.200123	7.94754e-06	0.597021	56.6 - 61.4	54.1 - 67.8	40	32.8 - 133	ASI4.1
W22×TIL01	ASI	7@63.1	7	63.1216	4.62981	8.20291	0.65705	-0.463513	5.53078e-06	0.16565	60.8 - 64.5	60.6 - 65.4	112.9	107.1 - 122.2
W22×TIL25	ASI	8@129.6	8	129.605	4.77523	4.75866	-0.575828	-0.455778	2.18441e-05	0.233272	125.3 - 132.3	124.5 - 137.9	177.5	176.6 - 181	ASI8.1
W22×TIL01	ASI	9@86.7	9	86.6558	5.86659	10.5321	-0.83836	1.17983	6.52529e-07	0.0114586	85.3 - 88.2	83.2 - 89	137.8	134.4 - 139.3	ASI9.2
W22×TIL11	BARE	1@130.0	1	130	7.12643	11.0641	0.355001	-0.354281	2.1e-08	0.0210482	127 - 131.7	125.7 - 131.9	270.4	263.1 - 273.1
W22×TIL25	BARE	2@129.3	2	129.294	9.88867	8.19305	0.259343	-0.19583	2.71106e-11	0.0137944	128.7 - 130	128.2 - 130.2	221.3	220.6 - 221.8	BARE2.2
W22×TIL01	BARE	4@26.2	4	26.2134	15.483	20.8331	0.396305	0.254959	4.99034e-16	0.0905166	25.3 - 27.1	23.4 - 27.1	10.4	7.4 - 10.5	BARE4.1
W22×TIL25	BARE	4@30.5	4	30.5304	11.8343	9.95359	0.219058	0.223148	1.06803e-11	0.0258231	30.1 - 31.6	30.1 - 31.6	11.3	11.1 - 11.7
W22×TIL14	BARE	4@55.5	4	55.5135	13.1086	22.7389	0.377903	-0.221758	1.25285e-14	0.0271715	53.6 - 56.3	52.5 - 57	35.9	29.6 - 37.9	BARE4.2
W22×TIL25	BARE	4@55.5	4	55.5136	11.6343	9.77029	0.20555	0.158856	4.60277e-09	0.0105223	53.9 - 56.7	52 - 56.7	35.9	28.9 - 37.2	BARE4.2
W22×TIL03	BARE	4@57.2	4	57.1697	20.5672	30.2418	0.506901	0.0840434	1.76185e-20	0.473844	56.5 - 57.9	56.1 - 58	38.4	36.6 - 38.9	BARE4.2
W22×TIL11	BARE	4@60.6	4	60.6374	4.89171	7.40942	0.257715	-0.322094	4.94e-06	0.0251453	59.8 - 61.3	58.9 - 61.6	46.3	40 - 58.6	BARE4.3
W22×TIL01	BARE	4@60.9	4	60.8584	6.09373	7.40099	0.32223	0.114381	1.66167e-06	0.429048	57.8 - 66.1	57.7 - 67.4	49.6	38.8 - 128.5	BARE4.3
W22×TIL11	BARE	5@84.9	5	84.9399	11.3565	18.4844	0.276835	0.300969	7.01e-10	0.0044985	83.5 - 87.9	82.7 - 87.9	153.7	139.9 - 163.7	BARE5.1
W22×TIL03	CULM	1@26.2	1	26.1506	6.29942	7.0713	0.879554	1.18461	2.52565e-05	0.0459537	24.7 - 27.5	24.7 - 28.2	11	10.1 - 12.4
W22×TIL25	CULM	1@95.9	1	95.9317	15.0393	15.1382	-1.77657	0.787209	6.00519e-16	0.0820831	87.5 - 96.4	87.3 - 96.9	204.8	181.9 - 206.9	CULM1.1
W22×TIL03	CULM	2@47.1	2	47.1317	8.62174	9.87591	-1.27399	1.38683	1.12158e-09	0.0283593	42 - 50.8	41.5 - 52	18.9	14.2 - 24.1	CULM2.1
W22×TIL14	CULM	2@53.9	2	53.8814	4.56201	8.58689	-0.942994	-0.647676	8.89775e-05	0.246219	48 - 64.8	43.8 - 66.4	25	15.7 - 39	CULM2.1
W22×TIL25	CULM	2@74.4	2	74.4445	13.9062	13.8762	-1.04751	-0.559405	5.37732e-14	0.136888	74.2 - 79.5	70.3 - 79.6	53.5	44.5 - 71.2
W22×TIL01	CULM	2@95.4	2	95.3709	9.30576	10.8955	-0.865316	-1.91748	3.43323e-06	0.000527557	94.7 - 95.9	93.9 - 95.9	185.6	183.7 - 186.2	CULM2.2
W22×TIL03	CULM	2@101.7	2	101.685	5.85222	6.54387	-0.950305	0.916013	5.02353e-07	0.0957006	97.8 - 102.8	92.7 - 104.9	192.6	180.6 - 195.2	CULM2.2
W22×TIL03	CULM	3@79.0	3	78.9753	4.28762	4.7299	-1.00304	0.19684	2.08421e-05	0.738392	68 - 88.9	66.6 - 90.1	129.6	49.9 - 168.5	CULM3.1
W22×TIL25	CULM	4@24.2	4	24.2198	4.87051	4.53744	0.733622	-0.946442	4.39045e-06	0.103092	19.5 - 26.4	18.6 - 28.9	7.9	5.8 - 11.1
W22×TIL03	CULM	5@73.0	5	72.9734	5.68381	6.34628	-1.56269	2.18603	2.43975e-06	9.59744e-05	72.4 - 73.5	71.8 - 73.7	55.9	47.1 - 60.8	CULM5.1
W22×TIL01	CULM	5@86.1	5	86.1014	8.67543	10.0896	-1.42012	0.898895	8.51689e-10	0.153048	85.7 - 86.4	84.8 - 86.4	155.4	153.3 - 157.7
W22×TIL01	CULM	6@33.6	6	33.6309	4.50676	5.01567	-0.562093	-1.57281	0.00227247	0.00686711	31.3 - 35.1	25 - 37.2	91	41.7 - 93.4	CULM6.1
W22×TIL03	CULM	6@47.9	6	47.9475	4.78567	5.30209	-0.823544	0.569457	4.81543e-06	0.274432	39.2 - 51.3	37.6 - 51.8	106.6	95 - 111.8	CULM6.1
W22×TIL01	CULM	6@81.3	6	81.2974	7.09258	8.1114	-1.35721	0.588862	4.54836e-08	0.294779	78.6 - 82.1	75 - 83.2	151.1	142.5 - 152.1	CULM6.2
W22×TIL25	CULM	6@95.2	6	95.2389	6.39397	6.02545	0.821396	0.268617	6.75764e-07	0.522954	93.2 - 98.1	92.5 - 98.9	161	159.7 - 162.6	CULM6.2
W22×TIL01	CULM	7@24.2	7	24.1948	6.08764	6.88862	-0.74074	2.09036	1.14848e-05	0.00156474	21.3 - 25.4	19.8 - 30.8	5.4	4.4 - 6.8
W22×TIL01	CULM	7@86.1	7	86.0992	4.46114	4.96253	-0.708814	-0.631001	8.39443e-05	0.200811	74.3 - 89.9	72.1 - 91.3	146.5	132 - 156.9
W22×TIL14	DTA	1@3.3	1	3.34459	8.47783	4.74798	1.54231	-2.49928	3.65605e-08	5.92569e-05	2 - 6.5	1.9 - 6.5	2.9	1.8 - 3.5	DTA1.1
W22×TIL11	DTA	1@10.7	1	10.6815	6.75542	4.26286	1.16329	-0.119894	1.85e-07	0.843355	7.2 - 12.4	0 - 13.4	4.9	0.1 - 5.6	DTA1.1
W22×TIL03	DTA	1@12.1	1	12.1185	7.33604	3.19202	1.08523	-0.812509	3.50025e-08	0.183591	8.3 - 14.5	4.8 - 15.1	5.2	3.2 - 6.2	DTA1.1
W22×TIL11	DTA	1@59.7	1	59.7437	11.7078	7.79594	1.79995	-1.18986	2.53e-12	0.0281203	59.2 - 60.2	58 - 60.2	40.8	39.2 - 41.6
W22×TIL03	DTA	1@79.0	1	79	17.5754	8.37092	1.68858	-0.142989	1.58799e-17	0.822436	78.3 - 80.7	78.3 - 80.8	124.4	101.2 - 161.6	DTA1.2
W22×TIL14	DTA	1@81.8	1	81.8279	6.85891	3.77908	2.5573	-3.17218	1.51194e-07	4.15904e-05	80.3 - 82.7	80.3 - 82.7	164	156.9 - 168.1	DTA1.2
W22×TIL11	DTA	1@130.5	1	130.5	5.74272	3.5846	1.35341	-1.53481	1.32e-06	0.0175579	128.2 - 134.4	125.7 - 134.9	270.9	263.1 - 277.1
W22×TIL25	DTA	1@151.7	1	151.683	11.0049	6.59831	1.73969	-0.0619672	2.61286e-11	0.923179	151 - 152.3	150.9 - 153	290.2	289 - 291.1	DTA1.3
W22×TIL03	DTA	1@152.0	1	151.986	7.46771	3.25304	1.28808	-1.68836	6.63999e-08	0.00258511	151.4 - 153.7	151.3 - 153.7	290.4	290.2 - 291.6	DTA1.3
W22×TIL11	DTA	2@14.6	2	14.6297	8.15078	5.22139	0.999815	-2.95599	9.3e-07	4.07e-05	9.8 - 16.3	9.2 - 16.9	4.2	3 - 4.6
W22×TIL14	DTA	2@60.3	2	60.3015	10.7513	6.16177	1.75552	-1.41506	1.71726e-11	0.0496251	59.4 - 63.7	57.1 - 63.7	31	29 - 35.5	DTA2.1
W22×TIL01	DTA	3@77.8	3	77.7553	4.52682	3.34156	1.07525	-1.92785	4.47076e-05	0.00911745	76.2 - 79.8	74.9 - 80.4	122.4	99.1 - 137.6
W22×TIL03	DTA	3@86.5	3	86.4847	6.95159	3.01464	1.40873	-0.390439	1.41028e-07	0.567297	85.8 - 90.1	85.8 - 90.1	159.3	158.1 - 168.5	DTA3.1
W22×TIL25	DTA	3@86.9	3	86.9155	7.44411	4.34423	1.51194	-1.28995	1.40691e-08	0.0516813	84.9 - 98.8	84.7 - 100.2	160.4	155.8 - 182.2	DTA3.1
W22×TIL01	DTA	3@115.8	3	115.796	4.58582	3.38721	1.47961	0.0592337	4.8798e-05	0.937613	112.5 - 119.4	111.7 - 120.2	199	193.2 - 203.1	DTA3.2
W22×TIL11	DTA	3@119.5	3	119.472	6.40599	4.02719	1.0104	1.42008	6.02e-05	0.0330423	119.1 - 123	118.7 - 123	202.7	202.4 - 205.6	DTA3.2
W22×TIL14	DTA	3@129.6	3	129.588	7.27023	4.02233	1.52507	-1.77054	4.71405e-08	0.0154983	129.2 - 131	129.1 - 131	212.2	211.6 - 212.6
W22×TIL01	DTA	3@160.7	3	160.711	4.79912	3.55274	0.958091	1.17529	0.000175527	0.0950412	158 - 161.8	157.9 - 163.9	228	226.8 - 230.7	DTA3.3
W22×TIL03	DTA	3@167.7	3	167.732	8.79585	3.87625	1.34579	-0.219789	3.3878e-09	0.699097	166.1 - 168.3	166.1 - 168.7	232	231.3 - 233	DTA3.3
W22×TIL03	DTA	4@90.6	4	90.6067	7.66323	3.3439	1.2963	-1.2708	2.4938e-08	0.0564958	89.2 - 91.7	89.1 - 91.7	183.2	181.5 - 183.8	DTA4.1
W22×TIL01	DTA	4@105.6	4	105.626	7.44534	5.66838	1.69367	-2.05997	2.62604e-08	0.0270582	104.6 - 107.3	104.5 - 109.4	199.9	196.7 - 206.4	DTA4.2
W22×TIL03	DTA	4@114.5	4	114.546	7.57499	3.30285	1.2956	0.23314	6.32446e-08	0.682413	112.2 - 115.2	112.2 - 115.6	220.5	214.2 - 222.5	DTA4.2
W22×TIL11	DTA	5@8.1	5	8.063	4.2881	2.6353	0.908287	-1.23551	4.79e-05	0.0582884	7.4 - 10.5	6.3 - 11.2	1.6	1.1 - 2.2
W22×TIL14	DTA	5@15.9	5	15.9103	11.0252	6.33643	1.42572	1.89074	5.63281e-10	0.0140579	15 - 17.6	14.7 - 17.6	3.3	2.8 - 3.5
W22×TIL25	DTA	5@21.6	5	21.6042	4.27016	2.43309	1.0856	-0.205015	2.38986e-05	0.792105	15 - 25	5.6 - 28.1	4.7	0.1 - 6.4	DTA5.1
W22×TIL01	DTA	5@23.5	5	23.4584	5.96834	4.47322	1.35829	-0.0657475	8.25004e-07	0.924487	21.8 - 25.5	21.6 - 26.7	5.2	4.7 - 6.1
W22×TIL03	DTA	5@36.1	5	36.1068	5.56968	2.38655	0.817341	1.01184	6.72454e-05	0.0887197	34.4 - 40.4	30.3 - 46.8	8.4	6.9 - 13.6	DTA5.1
W22×TIL11	DTA	5@80.4	5	80.3912	10.2533	6.71987	-1.16377	-0.705227	5.74e-10	0.180522	78.7 - 82.7	78.7 - 84.5	114.2	85.6 - 150.4	DTA5.2
W22×TIL25	DTA	6@25.3	6	25.3323	7.2459	4.22222	1.49967	0.342324	0.000506896	0.000242146	24.7 - 25.9	24.7 - 25.9	45.4	40.6 - 45.6	DTA6.1
W22×TIL14	DTA	6@35.5	6	35.5415	14.3898	8.56035	2.13191	-2.45242	2.23103e-14	0.000101158	34.3 - 36	34.3 - 36	91.7	91.3 - 91.8	DTA6.1
W22×TIL01	DTA	6@70.1	6	70.0815	18.0154	15.3789	2.51295	0.348983	2.66542e-17	0.67845	68.4 - 70.3	68.4 - 70.5	134.4	134 - 134.8	DTA6.2
W22×TIL25	DTA	6@97.2	6	97.2428	11.4597	6.89492	1.56133	0.530797	9.14535e-11	0.332213	93.2 - 100.2	93.1 - 100.2	161.7	159.8 - 163.2
W22×TIL14	DTA	6@104.6	6	104.557	5.53554	3.00968	1.31138	-0.2983	1.72669e-06	0.698244	101.9 - 106	99.5 - 107.4	164.4	162.9 - 166
W22×TIL03	DTA	7@38.4	7	38.3936	8.85948	3.90646	-1.09405	1.63755	5.93408e-09	0.00827744	35.6 - 41.6	35.6 - 42.1	10.1	9.4 - 13.2
W22×TIL14	DTA	7@129.3	7	129.276	4.68096	2.52338	0.93197	-2.22478	0.000229457	0.000612439	127.2 - 129.7	127.1 - 131.2	178.4	177.1 - 178.1
W22×TIL03	DTA	7@140.7	7	140.716	10.3908	4.64356	1.43457	0.0550624	2.80204e-10	0.914448	137.2 - 141.6	136.4 - 141.6	180.3	179.3 - 180.7	DTA7.2
W22×TIL14	DTA	8@66.0	8	65.9602	9.36906	5.29468	1.61833	-0.0714983	1.19092e-09	0.893163	63.5 - 68.9	63.3 - 69.2	120.1	112.5 - 128	DTA8.1
W22×TIL25	DTA	8@66.2	8	66.2133	13.6063	8.32215	1.78824	0.642691	5.40143e-13	0.296459	64 - 70.6	63.3 - 71.2	120.9	112.5 - 135.1	DTA8.1
W22×TIL01	DTA	8@67.6	8	67.5812	9.48864	7.38331	1.53085	0.862083	5.15727e-09	0.212332	66.6 - 68.6	66.6 - 71.8	124.9	121.9 - 136	DTA8.1
W22×TIL11	DTA	8@68.5	8	68.5	27.9462	22.3356	2.78626	-1.64097	1.64e-27	0.00743262	68 - 69.1	68 - 69.1	127	126.3 - 128	DTA8.1
W22×TIL03	DTA	8@71.8	8	71.838	18.1301	8.67813	2.14763	-0.825947	8.3917e-18	0.0789092	70 - 72	70 - 72	136	130.5 - 136.5	DTA8.1
W22×TIL11	DTA	9@70.8	9	70.8278	12.2851	8.23229	1.54973	1.60163	1.32e-08	0.00870528	70.5 - 72.5	70.5 - 72.8	112.8	111.7 - 116.8	DTA9.1
W22×TIL25	DTA	9@72.0	9	72	7.95441	4.65999	1.45726	-1.08387	4.41728e-09	0.087639	69.6 - 73.9	69.3 - 75.9	114.8	106.7 - 121.6	DTA9.1
W22×TIL03	DTA	9@73.4	9	73.4101	24.8391	12.6335	2.78366	-0.035301	4.77883e-23	0.962046	70.7 - 74.2	70.5 - 75	117.7	112 - 118.9	DTA9.1
W22×TIL01	DTA	10@53.1	10	53.1188	27.389	25.9645	3.63651	-0.875398	9.36204e-27	0.293383	52 - 53.3	52 - 53.3	87.3	84.6 - 88.3	DTA10.1
W22×TIL25	DTA	10@53.6	10	53.578	27.2169	18.512	4.40939	-2.20733	7.48287e-27	0.00552032	52.4 - 54.6	52.4 - 54.6	88.7	85.9 - 95.3	DTA10.1
W22×TIL03	DTA	10@54.1	10	54.0701	36.5015	20.6844	3.18178	0.378248	1.32537e-33	0.57835	53.7 - 54.9	53.7 - 54.9	91.6	90.7 - 96.9	DTA10.1
W22×TIL11	DTA	10@54.5	10	54.5352	16.2151	11.3475	2.8675	-3.92489	2.75e-16	0.000298273	52.5 - 54.6	52.5 - 54.6	95.2	86.7 - 95.3	DTA10.1
W22×TIL14	DTA	10@56.3	10	56.2929	40.8237	32.2464	4.98174	-4.1232	5.85055e-40	8.23464e-06	56.1 - 56.5	56.1 - 56.5	103.8	103.4 - 105.9	DTA10.1
W22×TIL03	DTS	1@15.5	1	15.503	7.75886	8.77117	1.65033	2.59126	3.60928e-07	0.0287931	13.2 - 16.5	11.4 - 17.6	6.4	5.1 - 7.1	DTS1.1
W22×TIL11	DTS	1@43.4	1	43.4271	7.20594	6.82634	1.64431	0.258715	1.38e-07	0.718951	37.3 - 47.2	37.1 - 48	25.8	19.9 - 29.8
W22×TIL11	DTS	1@110.6	1	110.629	11.7513	11.6985	2.68609	-0.468375	3.6e-12	0.610816	109.5 - 111.3	109.1 - 112.9	234.5	230.1 - 243.6	DTS1.4
W22×TIL14	DTS	1@110.7	1	110.717	10.4237	9.62254	5.07711	-3.46089	4.15881e-11	0.0101036	110.5 - 113	110.5 - 113	234.7	234.5 - 243.9	DTS1.4
W22×TIL25	DTS	1@129.4	1	129.41	8.31977	3.68217	2.08643	-1.85647	3.24831e-09	0.00405614	129 - 129.5	127.8 - 129.5	269.3	266.3 - 269.8
W22×TIL25	DTS	1@152.2	1	152.158	9.09492	4.04898	1.58234	0.495966	4.01102e-09	0.46257	151.1 - 152.7	151 - 153	290.7	289.2 - 291.1	DTS1.5
W22×TIL25	DTS	2@9.0	2	8.99337	6.66253	2.91197	0.852107	1.80327	0.000129839	0.00378829	6.8 - 10.5	6 - 10.7	2.7	2.4 - 3.4
W22×TIL25	DTS	2@81.6	2	81.5747	7.17376	3.14755	-1.08322	0.962523	4.97229e-08	0.116318	78.5 - 84.3	73.5 - 89.1	85.7	50.2 - 162.4	DTS2.1
W22×TIL01	DTS	3@115.8	3	115.796	4.70343	3.85907	1.65354	0.0359044	3.48274e-05	0.96527	112.2 - 119.5	110.4 - 120.9	199	191.5 - 204.4	DTS3.1
W22×TIL01	DTS	4@105.6	4	105.626	6.38389	5.33261	1.74351	-1.94875	2.05795e-07	0.0724414	104.6 - 109	104.5 - 110.5	199.9	196.7 - 209.1	DTS4.1
W22×TIL01	DTS	5@23.6	5	23.5921	5.05536	4.16339	1.36689	0.083881	7.22237e-06	0.912816	21.6 - 28.1	21.3 - 28.8	5.4	4.7 - 6.6	DTS5.1
W22×TIL25	DTS	5@24.3	5	24.2899	5.86342	2.54731	1.29494	-0.908984	6.20389e-07	0.285393	17.9 - 27.1	17.8 - 27.1	5.5	3.6 - 6.2	DTS5.1
W22×TIL14	DTS	5@44.8	5	44.7989	7.93573	7.13933	1.98931	1.58521	1.2923e-07	0.129452	42 - 46.6	41.6 - 46.6	12.4	10.6 - 13.5
W22×TIL25	DTS	5@80.9	5	80.9132	5.05751	2.18389	-0.603458	-2.53765	0.0438366	0.000768359	79.6 - 82	72.6 - 82	126.3	55.1 - 134	DTS5.2
W22×TIL11	DTS	5@88.6	5	88.6072	9.30342	9.01657	-1.30635	-1.99417	2.59e-07	0.00194344	85 - 90.8	84.4 - 91.1	167.1	150.3 - 170.9	DTS5.2
W22×TIL25	DTS	6@14.3	6	14.2777	11.8802	5.40243	1.83111	-0.972153	1.19972e-12	0.234168	11 - 17.8	11 - 18.2	5.2	3.9 - 18.2
W22×TIL14	DTS	6@35.5	6	35.5415	6.00477	5.29588	2.05701	-1.84639	4.29505e-07	0.041138	34.3 - 37.2	34.3 - 37.4	91.7	91.3 - 94.2	DTS6.1
W22×TIL01	DTS	6@70.1	6	70.0815	11.8257	10.4762	2.20962	0.145805	4.97799e-12	0.873252	69 - 71.7	68.4 - 71.7	134.4	134 - 136.4
W22×TIL14	DTS	6@73.2	6	73.1997	5.34278	4.68019	1.50938	-3.33612	3.63389e-05	0.00144593	73.1 - 74.9	73.1 - 78	137.5	137.4 - 145.7	DTS6.2
W22×TIL25	DTS	6@86.5	6	86.509	11.5487	5.23837	1.66582	-0.183569	6.16804e-12	0.760544	85.4 - 88.2	83.8 - 88.6	156.2	152.8 - 157.4	DTS6.2
W22×TIL25	DTS	7@140.5	7	140.481	6.50893	2.84154	1.2369	0.429402	6.29873e-07	0.559487	138 - 142.2	137.5 - 142.2	180.3	179.8 - 182.2	DTS7.2
W22×TIL14	DTS	8@65.9	8	65.941	8.75059	7.93901	2.01203	1.44804	2.33592e-07	0.0726826	63.5 - 67.8	63.2 - 68.7	120	112 - 127.8	DTS8.1
W22×TIL25	DTS	8@65.9	8	65.941	16.6303	7.84385	2.02379	0.481589	1.42573e-15	0.445766	64 - 67.6	64 - 69	120	113.7 - 128	DTS8.1
W22×TIL11	DTS	8@68.5	8	68.467	15.0106	15.4916	2.5526	-0.933141	9.78e-16	0.240117	68 - 69.1	67.9 - 69.1	127	126.3 - 128	DTS8.1
W22×TIL03	DTS	8@71.8	8	71.838	5.07624	5.60492	1.90978	-0.673483	3.28075e-06	0.401681	67.6 - 73.5	67.5 - 74	136	123.9 - 142.8	DTS8.1
W22×TIL01	DTS	8@82.6	8	82.6455	7.16353	6.03405	1.07367	2.44012	3.50049e-05	0.00164599	81.7 - 84.5	81.5 - 86.2	157.1	155.5 - 161.7
W22×TIL11	DTS	9@70.8	9	70.8278	11.9699	11.9448	2.35217	1.00029	1.5e-10	0.212626	70.8 - 71.2	70.5 - 72.8	112.8	112 - 116.8
W22×TIL25	DTS	9@72.2	9	72.1614	11.0862	5.01089	1.68778	-0.220816	1.75475e-11	0.73073	71.4 - 73.5	69.6 - 73.6	114.8	108.3 - 117.7
W22×TIL03	DTS	9@77.8	9	77.7865	9.38837	10.7672	2.85389	-1.51233	1.34277e-10	0.159566	77.4 - 78.5	77.4 - 81	124.9	124.5 - 130.5	DTS9.2
W22×TIL01	DTS	9@86.0	9	86.0434	9.00182	7.734	1.9681	-1.30835	4.92809e-10	0.13413	85.3 - 86.7	84.3 - 89.8	137.1	135.9 - 139.5
W22×TIL01	DTS	10@53.3	10	53.2539	26.0601	27.0593	3.98173	-1.68934	4.4503e-26	0.0722787	52 - 53.3	51.8 - 53.3	87.5	83.9 - 88.3	DTS10.1
W22×TIL25	DTS	10@53.6	10	53.578	48.5244	29.5619	6.24574	-2.92989	1.73079e-46	0.00029519	53.5 - 54.3	53.5 - 54.6	88.7	88.7 - 95.3	DTS10.1
W22×TIL11	DTS	10@54.5	10	54.5352	15.0637	15.5556	3.93509	-5.12953	1.07e-15	0.000426401	52.5 - 55	52.5 - 55	95.2	86.7 - 98.1	DTS10.1
W22×TIL03	DTS	10@54.7	10	54.6968	16.9319	20.7749	3.48665	-2.02504	3.96336e-18	0.103564	53.3 - 55.1	53.1 - 55.2	95.4	87.3 - 99.6	DTS10.1
W22×TIL14	DTS	10@56.4	10	56.4068	18.7591	18.9086	4.99575	-4.27007	1.97763e-19	0.00246561	55 - 59.6	55 - 59.6	105.6	99.1 - 118.7	DTS10.1
W22×TIL14	DTS	10@114.1	10	114.106	5.53041	4.85386	1.72913	-1.99724	2.42159e-06	0.0316622	111.6 - 115.5	110.7 - 116	149.3	148.7 - 149.6
W22×TIL11	EB	3@61.4	3	61.4065	7.75413	5.87681	-0.00389955	0.211855	0.75711	1.4e-08	60 - 63.4	59.9 - 63.4	28.5	25.6 - 32.1
W22×TIL01	EB	4@51.9	4	51.9481	4.5918	7.98466	0	0	1.02249e-05	1.02148e-05	51.4 - 52.1	51.4 - 52.1	28.4	27.9 - 29
W22×TIL11	EB	5@25.5	5	25.4919	7.49298	5.66289	0.00891494	0.170937	0.369139	7.79e-08	25.2 - 25.7	25.2 - 25.7	5.8	5.8 - 5.8
W22×TIL25	EB	5@77.4	5	77.4305	7.42249	4.59615	0.000173445	0.0229277	0.914438	7.03586e-08	73.8 - 80.8	72.6 - 80.8	76.9	55.1 - 121.1
W22×TIL25	EB	5@112.2	5	112.209	38.1884	30.1029	0.10348	0.146003	1.57607e-18	1.1768e-24	111.6 - 112.3	111.6 - 112.3	195.4	195 - 195.6
W22×TIL11	EB	7@64.8	7	64.7723	5.91893	4.39816	0.0496245	-0.0106897	4.6e-07	0.656944	55.1 - 66.6	49 - 67.8	121.5	20.3 - 127.7	EB7.1
W22×TIL14	EB	7@67.0	7	67.0232	5.8101	10.8049	0.0550899	-0.060404	4.64782e-07	0.0215119	61.5 - 77.9	58.5 - 77.9	125.8	94.3 - 138.2	EB7.1
W22×TIL11	EB	10@85.7	10	85.7475	32.957	33.1751	0.0292562	2.66745	0.752641	9.37e-29	85.6 - 86	85.6 - 86	142.3	142.3 - 142.3
W22×TIL14	ED	1@2.6	1	2.57074	5.08987	5.18635	-1.49912	0.87898	2.68041e-06	0.17143	0.5 - 4.2	0 - 4.2	2.4	0.1 - 3.1
W22×TIL03	ED	1@33.4	1	33.3751	4.67099	4.44339	-1.20319	-0.352209	2.26394e-05	0.639972	29.9 - 47.6	17.5 - 49.7	16.4	7 - 31
W22×TIL14	ED	1@48.5	1	48.5441	5.83151	5.98755	-1.45297	1.80763	9.56942e-07	0.0133623	47.7 - 53.4	47.5 - 53.5	30.2	29.7 - 35.2	ED1.1
W22×TIL11	ED	1@52.7	1	52.6821	7.4965	5.37076	-1.33365	-0.0275497	7.66e-08	0.96276	51 - 55.3	49.7 - 61.7	34.1	31.1 - 43.9	ED1.1
W22×TIL25	ED	1@59.3	1	59.3475	21.2757	12.2059	-2.03346	0.0210358	3.11977e-20	0.966028	59.1 - 60.1	58.4 - 60.3	40.5	39.6 - 41.7	ED1.1
W22×TIL11	ED	1@127.4	1	127.43	14.6239	11.3294	-2.28052	1.56865	3.5e-15	0.0255629	127.2 - 127.6	127.2 - 128	264.7	264.1 - 266.4	ED1.3
W22×TIL25	ED	1@140.7	1	140.708	11.7972	6.28197	-1.39808	-0.755171	6.44154e-10	0.121356	139.6 - 141.1	139.3 - 141.1	282	281.2 - 282.9	ED1.3
W22×TIL03	ED	2@20.7	2	20.659	4.96957	4.73983	-1.22521	0.844736	3.38902e-06	0.255225	18.8 - 23.4	18 - 28.4	5.6	4.9 - 9.1	ED2.2
W22×TIL25	ED	2@59.9	2	59.9305	14.2271	7.72075	-1.30701	-0.591111	5.14171e-14	0.184661	58.9 - 61.2	58.2 - 61.2	30.5	29.8 - 31.4
W22×TIL11	ED	2@117.7	2	117.75	7.05334	5.02906	-1.20213	-0.483552	3.43e-07	0.463485	113.2 - 121.5	112.9 - 121.6	212.8	208.8 - 215.8	ED2.4
W22×TIL25	ED	2@126.1	2	126.083	9.15305	4.77511	-1.32954	2.86787	5.1552e-08	8.17005e-07	125.7 - 127.1	125.7 - 127.3	218.5	218.5 - 219.6	ED2.4
W22×TIL25	ED	3@23.5	3	23.4973	7.7734	4.01244	-1.10643	0.121245	1.23347e-08	0.820531	21.6 - 24.5	21 - 25.7	4.5	3.9 - 5.1	ED3.1
W22×TIL11	ED	3@30.0	3	29.9757	9.41736	6.88937	-1.40938	1.76167	5.71e-10	0.0119335	28.8 - 31.8	28.3 - 32.5	6.4	5.8 - 7.5	ED3.1
W22×TIL03	ED	3@48.5	3	48.455	4.94107	4.71147	-1.34048	-0.0600591	1.08272e-05	0.93182	45.5 - 57	45.5 - 60.2	14.3	12.3 - 25.9
W22×TIL25	ED	3@158.2	3	158.15	12.5334	6.71234	-1.33981	-0.784599	3.5394e-12	0.247549	156 - 160.4	156 - 160.4	226.8	225.5 - 227.9
W22×TIL01	ED	3@173.2	3	173.179	4.05047	4.13728	-1.01395	1.37336	5.77458e-05	0.0506719	170.2 - 174.8	167.5 - 174.8	234.4	231.7 - 234.5
W22×TIL01	ED	4@23.4	4	23.4335	9.54554	10.3386	-1.58522	-0.114634	1.44595e-10	0.890922	22.6 - 25.3	22.2 - 26.4	7.4	7 - 10.4	ED4.1
W22×TIL14	ED	4@52.0	4	52.0279	10.6287	11.4702	-1.85812	0.834419	1.19381e-11	0.166473	50.5 - 54.2	50.4 - 54.4	28.4	27.3 - 32.9	ED4.2
W22×TIL03	ED	4@56.3	4	56.2882	17.5044	18.6742	-2.33215	0.358452	4.59074e-18	0.554063	55.9 - 56.6	55.9 - 56.8	36.7	36.6 - 37.3	ED4.2
W22×TIL25	ED	4@61.5	4	61.4859	12.6762	6.79634	-1.59679	-0.542613	7.23111e-09	0.211084	59.1 - 62.9	58.8 - 63.4	56.2	39.9 - 74.2	ED4.2
W22×TIL01	ED	4@72.2	4	72.2017	5.72184	5.9489	-1.74209	0.542934	1.04277e-06	0.569331	70.4 - 90.8	69.2 - 96.8	154.6	144.1 - 189.2
W22×TIL01	ED	5@69.3	5	69.3481	15.0006	17.2387	-2.65068	0.681591	2.95414e-15	0.344855	67.3 - 71.2	67.1 - 72.7	34.2	29.3 - 55.2	ED5.2
W22×TIL14	ED	5@72.6	5	72.5595	12.1363	13.3059	-2.79835	1.05177	1.90536e-12	0.131018	70.7 - 74.3	70.3 - 74.9	55.1	37.8 - 65.1	ED5.2
W22×TIL25	ED	5@73.2	5	73.2028	12.8221	6.88236	-2.22539	1.8682	1.33001e-13	0.00267182	72.1 - 74	70.6 - 74.8	56.3	40.4 - 64.6	ED5.2
W22×TIL11	ED	5@85.5	5	85.5	18.4227	14.8913	-1.75277	-1.19766	1.38e-16	0.0157281	82.7 - 87.9	82.6 - 89.6	154.3	139.7 - 167.8
W22×TIL03	ED	5@87.4	5	87.4269	9.4162	9.34078	-2.35032	1.68132	1.59876e-10	0.0259813	86.1 - 89.4	86 - 89.9	163.1	155.2 - 168.3
W22×TIL25	ED	6@99.8	6	99.8323	10.4395	5.50069	-1.27312	-0.50182	1.72547e-09	0.273039	95.5 - 100.6	95.5 - 101.5	162.9	161 - 163.8	ED6.2
W22×TIL11	ED	7@51.5	7	51.5	6.80154	4.83633	-0.76636	-1.97492	0.000261508	0.000980571	50.3 - 54.4	50 - 59.2	22.8	22.1 - 100.7	ED7.1
W22×TIL25	ED	7@68.2	7	68.1954	12.7122	6.81756	-1.96747	0.0574866	8.13544e-12	0.924555	66.7 - 69.1	66.4 - 70	128.2	124.9 - 129.8
W22×TIL03	ED	7@87.1	7	87.0581	5.96581	5.74007	-1.36489	-0.305139	1.33785e-06	0.665472	75.8 - 88.3	75 - 89.6	148	135.1 - 151.7
W22×TIL14	ED	7@87.1	7	87.1319	5.09374	5.1905	-1.21188	1.58092	4.45358e-06	0.0325506	86.7 - 93.1	84.3 - 93.1	148	144.5 - 159.2	ED7.2
W22×TIL11	ED	7@100.0	7	99.9628	14.0114	10.7813	-1.69765	-0.907682	1.12e-12	0.0856642	99.6 - 101	99 - 102.1	165.3	165 - 166.1	ED7.2
W22×TIL25	ED	8@11.6	8	11.5673	6.03848	3.07566	-0.846986	-1.02461	1.02632e-05	0.0783077	10.4 - 13.3	10.2 - 14.5	4.5	3.8 - 5.4
W22×TIL11	ED	8@72.9	8	72.9427	11.6716	8.75199	-1.57377	-1.33855	8.22e-10	0.0468609	72.2 - 74.4	72 - 74.7	138.2	136.7 - 144.1	ED8.1
W22×TIL01	ED	8@91.6	8	91.5531	6.77294	7.12095	-1.28229	-0.0232459	7.6547e-08	0.974532	88.3 - 93.4	86.8 - 93.7	164.9	162.3 - 166.4	ED8.2
W22×TIL03	ED	9@58.5	9	58.5287	6.86777	6.66067	-1.45038	-1.1144	1.64191e-06	0.176089	56.2 - 60.7	52.7 - 65.6	27.3	22.5 - 96.6	ED9.1
W22×TIL11	ED	9@74.3	9	74.2991	6.60862	4.68937	-1.01145	-1.73729	0.000308536	0.00900462	72.4 - 75.6	71.5 - 75.6	118.7	114.2 - 121
W22×TIL14	ED	10@60.6	10	60.6217	9.32788	9.93063	-2.35424	2.38801	2.0772e-10	0.00463927	57.8 - 61.4	57.8 - 61.4	120.8	114 - 123.3	ED10.1
W22×TIL01	ED	10@112.6	10	112.611	4.98186	5.13904	-1.05811	-1.5305	0.000177891	0.0599571	104.5 - 115.4	102.9 - 116.9	149.2	147.2 - 150
W22×TIL11	EL	1@65.4	1	65.3928	9.3982	11.4396	-0.874624	0.303016	2.09e-10	0.332755	64.9 - 68.3	64.7 - 68.3	47.6	46.9 - 51.9
W22×TIL14	EL	1@74.3	1	74.3142	4.12111	5.08025	-1.21326	0.496208	8.85377e-05	0.265012	72.1 - 79.1	70.8 - 79.1	63.5	54 - 127.6
W22×TIL03	EL	1@98.2	1	98.2131	7.30475	5.99295	0.672023	-0.755073	2.48761e-08	0.106523	95.6 - 100.3	95.4 - 101.2	209	203.4 - 212.1	EL1.1
W22×TIL01	EL	1@105.9	1	105.876	14.069	20.8523	-1.48481	-0.0648835	1.46798e-14	0.908594	104.3 - 115.4	104.3 - 115.4	221.1	218 - 249.8
W22×TIL11	EL	1@141.7	1	141.664	4.91502	5.70043	-0.684399	0.641842	3.85e-06	0.0732881	141 - 145.4	140 - 145.9	283.2	281.8 - 286	EL1.2
W22×TIL25	EL	1@152.5	1	152.545	6.68877	4.0848	-0.600093	-0.156536	4.96908e-07	0.601986	148.7 - 154.3	148 - 154.9	291.1	286.7 - 292.2	EL1.2
W22×TIL25	EL	2@54.4	2	54.4003	6.27442	3.81979	-0.471351	-0.330369	1.2555e-06	0.209177	52 - 57.3	50.5 - 60.9	25	23 - 31	EL2.1
W22×TIL03	EL	3@17.2	3	17.1959	6.58057	5.36479	-0.56757	1.10181	9.89642e-07	0.00160061	16 - 28.5	9.4 - 28.6	2.9	1.5 - 5.9
W22×TIL25	EL	3@67.0	3	66.9862	6.80052	4.15655	0.61617	-0.459959	7.13231e-08	0.144325	65 - 69.2	62.9 - 70	50.6	31.1 - 68.1	EL3.1
W22×TIL25	EL	3@156.3	3	156.293	7.6201	4.68643	-0.390819	-1.41607	0.000315655	0.000204403	154.9 - 158.9	154.8 - 161.9	225.7	225.3 - 228.8
W22×TIL25	EL	4@58.0	4	57.9946	6.13379	3.73022	0.375664	0.720974	0.00983495	0.00508995	56.7 - 62.8	54.4 - 63.5	38.9	33 - 75.4	EL4.1
W22×TIL03	EL	4@61.3	4	61.3339	18.5142	16.7781	1.13305	0.0399126	1.07765e-17	0.883074	60.3 - 61.7	59.9 - 62	54.9	43.9 - 60.3	EL4.1
W22×TIL25	EL	5@25.9	5	25.8961	6.97228	4.26707	-0.705594	0.387429	5.54658e-08	0.325896	25 - 28.8	24.8 - 31	6	5.7 - 7
W22×TIL11	EL	5@77.0	5	77.0287	13.2795	16.8646	-0.897477	0.47002	2.4e-14	0.109033	76.3 - 79	75.7 - 79	76.5	70.8 - 86.2	EL5.1
W22×TIL03	EL	5@88.4	5	88.394	7.89264	6.50863	-0.913615	0.681482	5.27188e-09	0.0388517	86.1 - 88.5	86.1 - 93	166.1	155.4 - 174.7
W22×TIL25	EL	6@22.3	6	22.2547	9.8098	6.1342	-0.787082	0.144299	2.16754e-10	0.663414	20.4 - 23.3	20 - 23.3	31.6	26 - 36.1	EL6.1
W22×TIL14	EL	6@33.3	6	33.3323	5.48673	6.85665	-0.730571	1.29127	9.70654e-06	0.000357353	32.2 - 35.3	31.9 - 39.8	90.6	88.2 - 98.1	EL6.1
W22×TIL01	EL	6@72.9	6	72.8659	8.0843	11.2376	-1.05753	0.604678	2.09339e-09	0.195843	71.4 - 76.8	70.8 - 81.3	136.9	135.4 - 151.1	EL6.2
W22×TIL01	EL	7@63.1	7	63.1215	8.48198	11.8403	-0.835236	-0.194488	3.21352e-09	0.541961	62.4 - 71.7	62.1 - 71.9	112.9	111.6 - 131.8	EL7.1
W22×TIL11	EL	7@63.7	7	63.7478	7.96352	9.54381	-0.635432	-0.510003	2.72e-07	0.0954617	61.3 - 66.2	59.6 - 67.9	116.2	103.4 - 127.7	EL7.1
W22×TIL25	EL	7@66.7	7	66.7084	5.47283	3.31173	-0.788862	0.385379	2.13176e-06	0.291202	65.8 - 69.1	64.6 - 73.5	125.1	121.4 - 133.9	EL7.1
W22×TIL03	EL	7@86.9	7	86.8554	5.39073	4.34948	-0.568056	-0.118774	4.19459e-06	0.711708	85 - 91.1	82.6 - 91.6	147.9	140 - 157.4
W22×TIL03	EL	8@37.9	8	37.8632	5.1288	4.12874	-0.563672	0.74444	3.89332e-06	0.0658337	36.8 - 39	36.5 - 39.2	17.6	16.9 - 17.9
W22×TIL25	EL	8@80.7	8	80.7146	14.8943	9.68326	-0.853551	0.843767	2.95439e-15	0.00474611	80.1 - 81.7	80.1 - 81.9	154.1	153.6 - 155.8	EL8.1
W22×TIL03	EL	8@122.0	8	121.981	4.96617	3.99219	-0.407016	1.23482	0.000243965	0.000425057	120 - 125.1	119.1 - 128.9	175.9	175.4 - 177.3	EL8.2
W22×TIL25	EL	9@92.5	9	92.5099	4.4364	2.66373	0.443081	0.171156	5.56758e-05	0.560354	87.1 - 96.8	85.3 - 97.4	140.8	136.6 - 143.3
W22×TIL25	EL	10@58.1	10	58.079	12.7775	8.17304	-1.18511	0.578788	2.48862e-13	0.104155	57.8 - 59.8	57.8 - 59.9	114.8	114 - 118.9	EL10.1
W22×TIL14	EL	10@58.3	10	58.277	17.319	24.4218	-1.87284	1.67848	1.39663e-18	0.000490904	57.8 - 59.6	57.8 - 60.6	114.9	114 - 120.8	EL10.1
W22×TIL11	EL	10@59.1	10	59.0655	10.7748	13.3133	-1.25525	1.59242	1.12e-11	0.00106508	56.2 - 60.5	56.2 - 60.9	117.1	103.8 - 121.8	EL10.1
W22×TIL03	EL	10@63.2	10	63.2061	10.5235	8.88107	-0.802832	-0.068956	5.42226e-11	0.855031	61.7 - 65.2	61.7 - 65.7	128.1	123.4 - 131.9	EL10.1
W22×TIL11	GLCO	1@58.4	1	58.3696	4.01905	5.93651	-0.140244	0.250145	0.000148659	0.00325451	57.5 - 60.2	55.9 - 60.2	39.6	35.5 - 41.7
W22×TIL03	GLCO	1@64.3	1	64.3201	4.38496	6.63799	-0.124834	0.214333	2.71429e-05	0.0209775	61.7 - 68.3	53.2 - 68.4	46.2	34.7 - 51.9
W22×TIL25	GLCO	1@96.5	1	96.5	5.00462	3.86535	0.338203	-0.201847	2.78789e-06	0.159065	95.6 - 100	84.3 - 100.5	206.9	175.8 - 211.7
W22×TIL25	GLCO	2@81.7	2	81.6516	30.9574	29.243	0.57446	-0.123807	9.48507e-32	0.350413	81 - 83.1	80.9 - 84.1	88.2	82.5 - 141.1	GLCO2.1
W22×TIL14	GLCO	2@87.8	2	87.7589	5.27617	7.78853	0.15255	0.270571	0.000577389	0.0120273	85.8 - 88.2	83.2 - 90.8	156.2	127.5 - 173.4	GLCO2.1
W22×TIL11	GLCO	2@104.4	2	104.438	7.92066	12.1999	0.171059	0.215922	2.59e-07	0.0319564	103.7 - 105.3	102.2 - 107.1	195.1	193.1 - 197.9
W22×TIL01	GLCO	2@139.6	2	139.57	8.62015	13.1547	0.377036	0.0186915	2.81691e-09	0.906489	137.9 - 143.1	137.8 - 143.5	227.2	226.5 - 230.2	GLCO2.2
W22×TIL01	GLCO	2@173.5	2	173.518	8.38817	12.7692	0.295622	0.123233	7.57531e-09	0.426318	172.2 - 173.8	171 - 173.8	240.9	244.1 - 241.1	GLCO2.3
W22×TIL25	GLCO	3@21.4	3	21.3763	5.36215	4.15265	0.248607	-0.187602	1.07729e-06	0.197023	20.7 - 24.9	19.9 - 30.4	3.9	3.8 - 6.4
W22×TIL25	GLCO	4@59.3	4	59.3238	10.951	8.84778	0.392265	0.170641	3.29202e-08	0.157976	57.6 - 61.3	57.4 - 62.3	40.8	38.6 - 62.4	GLCO4.1
W22×TIL14	GLCO	4@60.0	4	60.0161	8.57617	13.0874	0.287171	-0.0569807	2.06902e-09	0.547304	57 - 62.2	57 - 66.2	44	37.7 - 101.6	GLCO4.1
W22×TIL25	GLCO	6@64.1	6	64.1435	7.6314	6.01214	-0.316295	-0.0296886	3.47658e-08	0.83046	59.6 - 67.1	55.8 - 67.3	126.7	111.3 - 133.5	GLCO6.1
W22×TIL11	GLCO	7@122.6	7	122.646	4.36551	6.47215	0.135694	0.0592843	3.28e-05	0.539242	113.1 - 128.4	112.3 - 131.8	175.9	171.5 - 178	GLCO7.1
W22×TIL11	GLCO	8@50.9	8	50.8887	6.78684	10.3265	0.0991575	0.390645	0.00453181	5.08e-05	50.5 - 54.2	50.5 - 54.2	27.2	27 - 52.2
W22×TIL14	GLCO	8@119.5	8	119.469	4.77232	7.00934	0.190073	-0.142678	4.13448e-06	0.179065	116 - 121	114 - 122	175.4	174.2 - 175.9
W22×TIL03	GLCO	9@41.5	9	41.4897	4.51143	6.83689	0.146985	-0.139419	7.22555e-06	0.110971	39 - 43	29.1 - 44.9	16	10.9 - 18.2
W22×TIL11	GLUM	1@130.0	1	130	8.60751	10.8735	0.49455	-0.354848	6.05e-10	0.0637291	128.2 - 131.3	128.2 - 131.7	270.4	266.8 - 272.7	GLUM1.1
W22×TIL25	GLUM	1@133.2	1	133.153	8.60513	4.08708	0.369426	-0.207788	1.1552e-09	0.0474637	133 - 135.3	133 - 136	275.5	275.2 - 278.1	GLUM1.1
W22×TIL25	GLUM	2@5.1	2	5.0725	4.49333	2.06893	0.184578	-0.0909532	9.28937e-06	0.41124	3 - 7.6	2 - 11.6	2.2	1.7 - 3.4	GLUM2.1
W22×TIL25	GLUM	2@117.4	2	117.446	7.54427	3.55453	0.238744	-0.0552184	1.22045e-08	0.592166	105.6 - 118.6	104.9 - 118.6	212.7	195.2 - 213.6	GLUM2.2
W22×TIL25	GLUM	3@147.4	3	147.387	6.66123	3.1176	0.211962	0.157016	8.71681e-07	0.20918	144 - 149.5	144 - 150.9	221.5	220.8 - 223.4	GLUM3.2
W22×TIL01	GLUM	4@58.4	4	58.4278	21.2889	34.0803	0.70216	0.2778	6.01193e-18	0.0753196	58.1 - 59.1	58 - 62.4	39	39 - 64.6	GLUM4.1
W22×TIL25	GLUM	4@60.0	4	60.0162	63.2488	46.7241	1.04251	0.23612	5.75011e-49	0.0207296	59.8 - 60.5	59.8 - 60.5	44	43.6 - 45.6	GLUM4.1
W22×TIL03	GLUM	4@60.3	4	60.345	38.5285	48.9357	0.782391	0.163622	9.07837e-36	0.156571	59.9 - 60.9	59.9 - 60.9	45	43.9 - 49.7	GLUM4.1
W22×TIL14	GLUM	4@60.6	4	60.6059	61.9417	63.7446	1.00266	-0.255622	1.07333e-59	0.00423191	60.3 - 60.8	60.2 - 60.8	46	44.6 - 46.8	GLUM4.1
W22×TIL11	GLUM	4@60.6	4	60.6374	24.1151	36.3802	0.78811	-0.0364856	6.76e-24	0.838591	60.5 - 60.9	60.5 - 60.9	46.3	45.7 - 49.1	GLUM4.1
W22×TIL25	GLUM	4@107.1	4	107.091	4.73458	2.18396	0.359032	-0.137497	1.51557e-05	0.337345	104.8 - 108.7	104.8 - 108.7	202.4	198.1 - 204.8	GLUM4.2
W22×TIL14	GLUM	4@110.7	4	110.726	5.36974	2.98051	0.170698	-0.576084	0.000775286	1.05542e-05	110.1 - 112.8	109 - 113.5	210.3	206 - 217.8	GLUM4.2
W22×TIL01	GLUM	5@67.6	5	67.623	4.49878	5.9885	0.308642	-0.112761	8.46577e-06	0.481519	64.6 - 70.6	62.8 - 73.1	30.8	22.4 - 56.3	GLUM5.1
W22×TIL25	GLUM	6@99.6	6	99.6121	5.60014	2.6001	0.217323	-0.275165	1.5921e-06	0.0085021	93.3 - 100.5	93.2 - 100.6	162.9	159.8 - 163.4
W22×TIL11	GLUM	8@56.8	8	56.8405	4.68175	5.66274	0.256843	0.296932	0.000122373	0.11728	50.9 - 62.2	50.5 - 63.6	77.4	27 - 112.6
W22×TIL14	GLUM	8@63.0	8	63.0321	5.19709	2.87969	0.185921	0.0364774	8.88253e-06	0.674523	59.5 - 66	59.3 - 67.9	111	98.6 - 126.2
W22×TIL14	GLUM	10@101.0	10	100.972	6.55286	3.68063	0.224413	-0.11645	7.72573e-08	0.261706	99.8 - 103.4	98.5 - 104.4	146.9	146 - 147.8
W22×TIL14	KRN	1@2.3	1	2.338	5.0882	6.43649	-0.578823	0.821496	8.22146e-06	0.00288025	0 - 8.6	0 - 9.2	2.2	0.1 - 4.5
W22×TIL03	KRN	1@36.1	1	36.0655	6.11219	4.91676	-0.517742	0.06	5.28611e-07	0.820782	26.9 - 44.1	26.6 - 45	18.5	11.1 - 27.3
W22×TIL25	KRN	1@53.2	1	53.243	6.85878	3.15211	-0.463976	-0.0611991	2.21754e-07	0.780399	51.9 - 55.7	51.6 - 57.3	34.7	33.5 - 38.6	KRN1.1
W22×TIL14	KRN	1@74.4	1	74.3577	5.2647	6.67152	-1.11044	0.873037	1.7612e-06	0.00850998	73.3 - 80.4	73.3 - 80.4	64	59.1 - 157.1
W22×TIL25	KRN	1@96.5	1	96.4784	15.0677	7.37226	-0.85439	0.22501	1.14173e-14	0.312322	96.2 - 96.9	96.2 - 96.9	206.6	205.6 - 206.9	KRN1.2
W22×TIL03	KRN	1@165.6	1	165.648	8.60015	7.06961	-0.610809	0.318951	1.1434e-09	0.17555	164.6 - 166.6	164.6 - 168	298.5	298 - 299.5	KRN1.3
W22×TIL25	KRN	1@176.0	1	176.024	5.18314	2.35213	-0.350075	0.397352	4.12529e-06	0.0608669	174.8 - 179.9	174 - 181.5	303.2	302.3 - 305.1
W22×TIL03	KRN	2@27.0	2	27	6.63466	5.36131	-0.522858	0.285569	9.34635e-08	0.270153	24 - 28.1	23.4 - 28.4	7.7	6.4 - 9.1
W22×TIL25	KRN	2@46.7	2	46.7478	19.8224	10.0626	-0.653274	-0.0801737	3.26149e-19	0.672615	45.6 - 50.9	45.6 - 51.1	18.4	17.2 - 23.2	KRN2.2
W22×TIL11	KRN	2@47.9	2	47.8882	4.9299	6.31754	-0.423545	-0.331264	5.99e-05	0.200545	46 - 48.4	45.6 - 62.8	19.4	17.1 - 34.6	KRN2.2
W22×TIL25	KRN	3@31.0	3	30.9881	5.24386	2.38077	-0.347417	0.293085	3.00733e-06	0.170281	29 - 35.9	24.9 - 36.6	7.1	5 - 8.9
W22×TIL25	KRN	3@139.0	3	138.961	6.55299	3.00463	-0.464877	0.0762994	1.90783e-07	0.74333	135.9 - 144.4	135.6 - 144.6	218.1	216.1 - 220.9	KRN3.3
W22×TIL03	KRN	3@142.6	3	142.619	9.42207	7.80114	-0.583509	-0.076788	2.73332e-10	0.841097	141.4 - 145	141.3 - 145.1	219.8	219.1 - 221	KRN3.3
W22×TIL25	KRN	3@156.3	3	156.293	9.40066	4.4043	-0.506142	-0.0800637	6.46784e-10	0.765498	155.3 - 158.6	154.4 - 159	225.7	225.1 - 227.3
W22×TIL03	KRN	4@107.3	4	107.306	16.4103	14.4531	-0.878733	0.546377	3.29641e-17	0.0308003	104.7 - 108.6	104.2 - 108.6	202.4	196.2 - 204.5	KRN4.2
W22×TIL25	KRN	4@138.7	4	138.73	7.08291	3.26062	-0.439074	0.724596	2.35231e-07	0.00179979	133.6 - 141.1	132.6 - 141.6	242	240.4 - 242.7	KRN4.3
W22×TIL03	KRN	5@11.5	5	11.4867	6.56035	5.29784	0.48992	-0.322941	1.03353e-07	0.148343	8.1 - 13.6	8.1 - 15.7	2.2	1.6 - 3	KRN5.1
W22×TIL25	KRN	5@43.2	5	43.2182	9.54867	4.47868	-0.585827	-0.2976	1.86546e-07	0.186627	42.7 - 43.8	40.8 - 45.4	12.1	10.5 - 12.7	KRN5.2
W22×TIL03	KRN	5@89.6	5	89.6211	6.05925	4.87193	-0.589427	0.123438	8.13937e-07	0.641571	86.1 - 93.3	86.1 - 96.5	167.8	155.4 - 178.3	KRN5.3
W22×TIL14	KRN	5@91.0	5	91.0437	8.41681	11.0096	-0.842728	-0.183065	1.40203e-08	0.600307	89.5 - 94.1	89.4 - 94.6	170.9	167.8 - 175.2	KRN5.3
W22×TIL11	KRN	5@152.3	5	152.298	4.57572	5.84151	-0.475703	-0.0368386	1.11e-05	0.930145	149.1 - 155.7	148.7 - 155.8	218.6	217.6 - 219.4	KRN5.4
W22×TIL25	KRN	6@99.2	6	99.1668	10.283	4.85012	-0.497771	-0.0949592	6.15467e-10	0.601632	96.1 - 100.2	92.4 - 100.4	162.7	159.6 - 163.3	KRN6.2
W22×TIL11	KRN	7@61.7	7	61.6623	10.2444	13.903	-0.672929	-0.102559	9.85e-11	0.683445	59.6 - 65	57.4 - 65.2	111.2	86.9 - 122.2	KRN7.1
W22×TIL25	KRN	7@66.4	7	66.4342	7.74979	3.58567	-0.609998	0.454544	1.19425e-08	0.071076	65.8 - 68.5	65.7 - 69.1	124.9	123.7 - 129.5	KRN7.1
W22×TIL14	KRN	7@94.6	7	94.6319	5.39663	6.84775	-0.497074	-0.287954	9.41143e-06	0.325788	93 - 100.4	86.7 - 101.4	161.1	147.9 - 166	KRN7.2
W22×TIL11	KRN	8@72.5	8	72.4544	7.72739	10.2047	-0.560181	-0.6901	1.53e-06	0.029975	71.7 - 74.9	71.4 - 75.6	137.2	135.2 - 146.1	KRN8.1
W22×TIL03	KRN	8@102.5	8	102.455	6.96799	5.64701	-0.464231	0.402253	5.17129e-08	0.0775086	101.1 - 104.8	100.5 - 112.2	170.1	169.4 - 172.8	KRN8.2
W22×TIL11	KRN	9@40.0	9	39.9527	6.31541	8.21415	-0.51783	-0.381733	6.88e-06	0.157654	37.7 - 42.5	35.8 - 42.5	15.4	13.4 - 16.2	KRN9.1
W22×TIL25	KRN	9@126.2	9	126.194	4.09527	1.84332	-0.280853	-0.00874216	4.52366e-05	0.964913	119.5 - 127.4	117.2 - 129.5	155.6	153.4 - 156.5
W22×TIL25	KRN	10@51.6	10	51.578	6.5164	2.98703	-0.608176	0.413939	1.67084e-07	0.0785297	47.1 - 52.4	44.6 - 55.9	83.3	24.6 - 102.9	KRN10.1
W22×TIL14	KRN	10@60.6	10	60.6217	4.74479	5.98151	-0.615081	1.022	1.46801e-05	0.00421266	57.8 - 65.2	55 - 67.2	120.8	99.1 - 133.4
W22×TIL03	KW	1@57.2	1	57.2293	9.32147	9.09097	-0.0118688	-0.000155503	3.11905e-10	0.978179	54.9 - 58.4	54.3 - 58.4	38.6	35.3 - 39.6	KW1.1
W22×TIL25	KW	1@57.4	1	57.4337	9.37949	7.28263	-0.012946	0.0097426	1.4224e-10	0.0451705	56.7 - 58.4	52 - 58.5	38.9	33.5 - 39.6	KW1.1
W22×TIL25	KW	1@140.7	1	140.708	7.95054	6.10657	-0.0128123	0.0073431	3.69639e-09	0.116792	140.3 - 141.1	139.9 - 142	282.2	281.6 - 283.5
W22×TIL01	KW	2@53.9	2	53.8813	5.16319	6.60578	-0.0104072	-0.000403567	3.04955e-06	0.950712	52 - 56	51.5 - 56.9	25	23.9 - 28.9
W22×TIL14	KW	2@83.5	2	83.4842	11.7763	13.2565	-0.0166509	0.00501479	8.93019e-13	0.375268	80.5 - 86.6	80.5 - 88.1	132	74.4 - 157.7
W22×TIL25	KW	2@111.7	2	111.68	10.8564	8.5247	-0.0122907	0.00874265	5.51485e-12	0.044906	105.6 - 117.5	105.1 - 118.1	204.8	195.3 - 212.9	KW2.2
W22×TIL25	KW	3@23.4	3	23.4053	7.88866	6.0562	-0.0107119	0.00519593	4.17576e-09	0.310256	21.6 - 25.7	21 - 27.6	4.5	3.9 - 5.7
W22×TIL03	KW	4@56.4	4	56.3774	14.7066	15.0461	-0.0158634	0.00913205	7.48445e-16	0.0412134	55.9 - 56.7	55.9 - 56.8	36.7	36.6 - 37.3	KW4.1
W22×TIL14	KW	4@57.3	4	57.2894	12.1179	13.6895	-0.0181649	0.0110156	3.01094e-13	0.0221166	55.6 - 59.1	55.6 - 60.3	38.6	36.4 - 44.6	KW4.1
W22×TIL25	KW	4@59.9	4	59.8704	12.213	9.68981	-0.0176702	0.00315235	8.66795e-12	0.459624	58.8 - 61.3	54.6 - 62.9	43.6	33.8 - 69.7	KW4.1
W22×TIL01	KW	4@72.2	4	72.2017	12.6059	17.4636	-0.0227773	0.0204459	8.6776e-14	0.0100262	71.7 - 89.5	71.6 - 89.5	154.6	153.2 - 181.7	KW4.2
W22×TIL11	KW	4@92.6	4	92.6068	7.47023	11.0713	-0.0122779	0.000259097	1.15e-08	0.972018	91.1 - 97.6	90.6 - 98.3	184.8	183.2 - 190.1
W22×TIL03	KW	5@39.4	5	39.439	5.15567	4.8478	-0.00714165	-0.0141489	0.000426309	0.0154295	37.1 - 41.6	34.7 - 41.7	10.5	7.9 - 10.7	KW5.1
W22×TIL01	KW	5@64.6	5	64.6081	6.27298	8.1204	-0.0127457	-0.00302004	9.09429e-07	0.617464	57.1 - 66.8	48.4 - 68.5	23.7	14.1 - 32.6
W22×TIL25	KW	5@73.8	5	73.8486	5.26787	3.96497	-0.0121252	0.000645561	9.69246e-06	0.912462	71.2 - 75.2	70.3 - 77.8	61.2	37.8 - 80.2	KW5.2
W22×TIL14	KW	6@35.52	6	35.5415	5.09345	5.3542	-0.0111141	0.00620898	2.36796e-06	0.245816	32.8 - 37.6	32.6 - 38.3	91.7	89.1 - 96.2
W22×TIL11	KW	7@110.1	7	110.076	10.3107	15.759	-0.0150531	-0.00223148	1.06e-10	0.646783	108.9 - 111.4	106.3 - 113.7	170.9	168.2 - 172.4	KW7.2
W22×TIL25	KW	8@64.3	8	64.286	10.1807	7.95301	-0.012826	0.000852597	8.47962e-11	0.85682	62.7 - 69.2	61.8 - 70.5	114	106.9 - 132.6	KW8.1
W22×TIL11	KW	8@69.5	8	69.4862	8.14471	12.1592	-0.014078	-0.00251766	7.72e-09	0.695407	68.6 - 71.9	68 - 72	128.2	126.3 - 136.5	KW8.1
W22×TIL14	KW	8@73.6	8	73.5665	11.3959	12.7779	-0.0155441	0.00113755	4.26786e-12	0.819499	72 - 86.5	70.5 - 86.5	142.3	132.7 - 162	KW8.1
W22×TIL03	KW	8@83.0	8	83	10.3865	10.2254	-0.0124923	0.00924803	1.54148e-11	0.0808171	81.9 - 84.9	81.9 - 86	157.4	155.9 - 161.3
W22×TIL01	KW	8@96.2	8	96.1635	6.11504	7.90271	-0.0108421	0.000347306	2.69882e-07	0.956004	86.8 - 103.1	86.4 - 103.5	167.6	161.9 - 170.4	KW8.2
W22×TIL03	KW	9@75.2	9	75.2218	6.09816	5.78139	-0.0099365	-0.0152983	3.97863e-05	0.0350731	72.4 - 76.9	70.5 - 77.4	120.3	112 - 124.5	KW9.2
W22×TIL14	KW	9@111.0	9	110.961	7.35041	7.90617	-0.0123905	0.00688056	1.37184e-08	0.20397	110.3 - 113.4	107.2 - 118.5	150.8	149.6 - 154
W22×TIL25	LFLN	1@69.7	1	69.7396	6.19743	3.43944	1.40838	1.793	0.000144587	0.0322742	66.6 - 79.3	66 - 81.3	53.3	48.9 - 162.8
W22×TIL25	LFLN	1@130.2	1	130.247	9.48793	5.39844	2.54759	0.275192	1.93479e-08	0.746672	129.2 - 133	129 - 135.8	270.4	268.4 - 278	LFLN1.1
W22×TIL25	LFLN	2@71.9	2	71.8814	11.0046	6.33412	-1.84314	0.665982	7.97511e-12	0.379813	69.9 - 74.2	69.8 - 74.5	46.2	43.9 - 53.8	LFLN2.1
W22×TIL01	LFLN	2@85.0	2	85.0324	9.0647	6.66541	1.679	3.76632	8.22055e-05	0.000203809	83.1 - 85.7	80.2 - 85.7	145.7	73.8 - 147.7
W22×TIL14	LFLN	3@30.6	3	30.6005	5.58101	8.02928	-2.02108	5.34216	3.07057e-05	0.000333056	27.6 - 32	26 - 32.8	6.9	5.1 - 7.8	LFLN3.1
W22×TIL25	LFLN	3@39.8	3	39.7758	8.22677	4.63627	-1.9226	1.10624	3.7474e-09	0.213721	36.9 - 40.4	36.6 - 43.2	9.8	8.9 - 11.5
W22×TIL01	LFLN	3@45.5	3	45.4518	4.47948	3.13806	-2.1098	0.932921	1.29885e-05	0.433489	43.8 - 47.4	35.9 - 49.9	12.2	8.7 - 16.3
W22×TIL25	LFLN	3@74.4	3	74.3549	22.812	14.3865	3.54432	-0.404143	3.31514e-22	0.645126	74.3 - 74.4	74.3 - 74.4	94.3	93.5 - 94.3	LFLN3.2
W22×TIL01	LFLN	3@76.7	3	76.7149	12.9372	9.91601	3.55884	-1.78879	1.02441e-13	0.176712	76.4 - 77.8	76.2 - 77.9	115.2	113.9 - 123.2	LFLN3.2
W22×TIL14	LFLN	4@22.1	4	22.0755	4.34101	6.16835	-0.594058	-4.76852	0.253588	0.000224894	19 - 23.8	18.4 - 23.8	7	5.8 - 7.8
W22×TIL25	LFLN	5@11.5	5	11.4867	8.48044	4.78842	1.8748	1.10953	2.38866e-08	0.303774	9.6 - 12.4	9.6 - 12.4	2.2	1.9 - 2.4
W22×TIL01	LFLN	5@28.8	5	28.8437	8.25141	6.01514	2.00066	3.36208	2.05989e-05	0.00342594	27.6 - 30	27.6 - 32.5	6.6	6.4 - 7.4	LFLN5.1
W22×TIL14	LFLN	5@32.5	5	32.5425	7.12122	10.4049	2.47367	1.24663	8.68363e-08	0.34529	28.8 - 34.9	27.6 - 37.3	7.4	6.4 - 9.8	LFLN5.1
W22×TIL01	LFLN	5@75.8	5	75.7923	7.17246	5.16915	-1.74842	6.32207	0.000401244	1.98574e-07	73.6 - 76.3	73.5 - 76.8	71.1	60.6 - 74.8
W22×TIL25	LFLN	5@80.1	5	80.1348	6.35175	3.52919	-1.52684	-2.24881	0.000230518	0.0278643	79.6 - 81.6	79.6 - 81.6	98.8	89.4 - 130.2
W22×TIL25	LFLN	6@22.9	6	22.8645	4.26986	2.33556	-1.48657	1.51038	2.41092e-05	0.10458	20.4 - 30.3	15.6 - 30.5	35	7.2 - 82.5	LFLN6.1
W22×TIL01	LFLN	6@79.1	6	79.1104	13.0746	10.0362	-3.86887	0.98302	2.46914e-13	0.411794	78.6 - 80.8	77.6 - 80.9	146.9	145.6 - 150.3	LFLN6.2
W22×TIL01	LFLN	7@65.4	7	65.3861	17.3797	13.9797	-2.718	-4.17579	8.44337e-12	7.79015e-06	63.3 - 66.2	62.9 - 66.6	122.2	112.7 - 125.1	LFLN7.1
W22×TIL25	LFLN	7@125.8	7	125.829	5.25843	2.89774	-1.24761	3.18631	0.000109248	0.000242194	124.2 - 128	124 - 130.8	176.7	176.3 - 178.1
W22×TIL25	LFLN	8@72.0	8	72.0319	8.23557	4.64153	-1.843	0.193011	6.90596e-09	0.828197	62.2 - 72.7	62.2 - 75.2	136.7	108.1 - 144.9
W22×TIL25	LFLN	9@69.1	9	69.1138	14.4877	8.5645	-2.70439	0.371351	1.49269e-14	0.673403	68.9 - 69.7	68.3 - 69.7	106.6	105 - 108.4	LFLN9.1
W22×TIL14	LFLN	10@47.7	10	47.6815	4.4614	6.34705	2.35422	1.09455	7.66652e-05	0.471664	46.2 - 57.9	44.1 - 59.6	62.5	22.7 - 118.7	LFLN10.1
W22×TIL25	LFLN	10@51.6	10	51.578	6.297	3.49732	2.43051	-1.08847	3.40425e-07	0.270581	47.3 - 57.1	47 - 57.1	83.3	51.4 - 110.2	LFLN10.1
W22×TIL01	LFLN	10@52.2	10	52.1533	15.047	11.7995	3.58749	2.13154	4.58934e-13	0.0896124	51.3 - 53.3	51.3 - 53.3	85.3	82.5 - 88.3	LFLN10.1
W22×TIL25	LFWD	1@91.4	1	91.4107	13.4444	9.917	-0.544819	0.327905	2.5845e-14	0.021297	87 - 95.7	87 - 96.9	194.1	181.7 - 206.9	LFWD1.1
W22×TIL01	LFWD	1@94.0	1	94	4.18342	6.11955	-0.371997	0.303673	1.78056e-05	0.224624	90.6 - 95.4	78.3 - 96.2	201.5	104.9 - 205.7	LFWD1.1
W22×TIL25	LFWD	1@152.6	1	152.631	12.1364	8.86291	-0.407569	0.019694	1.94419e-12	0.889607	152 - 153	150.1 - 153.3	291.1	288.6 - 291.4	LFWD1.2
W22×TIL01	LFWD	2@109.9	2	109.917	6.58347	9.87654	-0.435191	0.0356489	1.55059e-07	0.861145	108.3 - 111.1	108.3 - 120.4	202	199.7 - 214.9
W22×TIL14	LFWD	3@137.0	3	136.962	4.14581	7.09572	-0.205843	0.948862	0.0320986	2.29729e-05	135.9 - 138.9	135 - 139	216.4	215.7 - 218.1
W22×TIL25	LFWD	4@115.8	4	115.81	5.9913	4.17579	-0.563602	0.778626	2.04927e-06	4.79588e-06	113.7 - 116	113.6 - 116.8	223.8	218.1 - 227.6
W22×TIL01	LFWD	5@40.4	5	40.4234	5.92257	8.82333	-0.357322	-0.302868	7.52649e-06	0.169251	38.5 - 43	33.2 - 47.4	10.5	7.5 - 13.7
W22×TIL25	LFWD	5@77.8	5	77.7625	13.8205	10.2239	-0.53424	-0.0310614	6.43662e-13	0.860045	77 - 79.6	77 - 79.6	80.2	76.5 - 89.4	LFWD5.1
W22×TIL14	LFWD	6@49.1	6	49.0835	5.48698	9.51794	-0.431822	0.2669	6.7471e-07	0.241462	45.8 - 51.3	45.7 - 60.3	108.2	104.4 - 119.4	LFWD6.1
W22×TIL25	LFWD	6@79.4	6	79.4416	12.0196	8.76979	-0.38329	-0.0448878	3.25078e-12	0.740121	78.4 - 81.4	78.2 - 83.6	146.9	146.4 - 152.8	LFWD6.2
W22×TIL01	LFWD	6@80.3	6	80.3482	7.86284	11.9566	-0.555868	0.705994	6.69418e-09	0.00113212	77.6 - 80.8	76.6 - 80.9	149.4	144.6 - 150.3	LFWD6.2
W22×TIL25	LFWD	6@116.8	6	116.793	5.89151	4.10316	-0.233895	-0.204168	2.15704e-05	0.133703	115.5 - 122.7	114.2 - 124.3	168.7	168 - 170.8	LFWD6.3
W22×TIL25	LFWD	7@7.3	7	7.25496	4.8928	3.38208	-0.234877	0.212637	4.29687e-06	0.1226	5.5 - 13	0 - 13	1.4	0.7 - 2.7
W22×TIL25	LFWD	9@91.1	9	91.0696	8.8697	6.31805	-0.252956	-0.356631	8.45583e-07	0.00911549	89.8 - 91.2	88.7 - 91.7	140.1	139.2 - 140.4	LFWD9.1
W22×TIL14	PLHT	1@73.5	1	73.5344	4.64883	7.86386	-9.79813	9.8516	5.22514e-06	0.00472562	73 - 74.3	72.7 - 79.1	60.7	57.4 - 127.6
W22×TIL25	PLHT	1@91.4	1	91.4107	12.2977	9.48039	-9.54084	3.61962	9.45271e-13	0.177284	87 - 96.4	84.3 - 97.1	194.1	175.8 - 208	PLHT1.1
W22×TIL25	PLHT	1@154.5	1	154.508	4.92032	3.58532	2.29759	-11.93	0.0389852	4.75959e-06	151.8 - 158.1	150.1 - 158.3	292	288.6 - 294.5
W22×TIL25	PLHT	2@83.1	2	83.1097	7.33618	5.44463	3.11161	9.34658	0.000124711	0.000168884	78.5 - 83.8	76.3 - 84.3	123.9	57.9 - 143.9	PLHT2.1
W22×TIL25	PLHT	3@87.1	3	87.1361	6.72691	4.96937	6.11571	-4.58951	6.89494e-08	0.108754	86.2 - 88.5	84.7 - 89.2	161.2	155.8 - 163.8
W22×TIL01	PLHT	3@104.6	3	104.633	5.51484	8.01141	12.4581	1.43981	1.11176e-05	0.798293	99 - 120	95.6 - 120.2	186.6	176 - 203.1	PLHT3.1
W22×TIL25	PLHT	5@17.9	5	17.9121	5.14422	3.75483	4.59896	3.73699	2.53547e-05	0.27931	14.1 - 22.1	12.7 - 24.3	3.6	2.4 - 5.5	PLHT5.1
W22×TIL14	PLHT	5@32.1	5	32.115	5.91444	10.1323	4.63032	9.00065	8.91614e-05	0.00702687	29.6 - 34.8	27.6 - 36.6	7.4	6.4 - 8.7	PLHT5.1
W22×TIL01	PLHT	6@81.5	6	81.5137	5.14731	7.44866	-11.2602	14.2231	3.16514e-06	0.00930978	77 - 82.1	77 - 82.8	151.1	144.9 - 151.9
W22×TIL01	PLHT	8@66.9	8	66.8996	6.00685	8.77148	9.65795	-1.50473	3.53717e-07	0.774346	66 - 72.8	65 - 74.9	122.3	115.7 - 144.4	PLHT8.1
W22×TIL25	PLHT	8@110.3	8	110.315	7.51768	5.58705	1.91271	13.2291	0.0206811	7.6279e-07	108.5 - 111.3	108.5 - 111.5	172.2	172 - 172.7
W22×TIL25	PLHT	9@27.4	9	27.4292	4.47235	3.24787	4.6888	-12.0118	0.000636424	0.000380296	23.4 - 29	22.9 - 29	10.5	8.7 - 10.9
W22×TIL25	PLHT	9@41.9	9	41.9434	7.88747	5.87841	-7.65983	1.17817	5.34533e-09	0.719666	41.3 - 43	38.4 - 43	16.1	15 - 16.5
W22×TIL25	PLHT	9@64.1	9	64.0696	10.8421	8.26518	-7.54887	11.4133	5.37593e-10	1.56488e-05	63.4 - 65	63.3 - 65.3	86.8	79.6 - 93.6	PLHT9.1
W22×TIL01	PLHT	10@47.4	10	47.443	5.30064	7.68292	10.0645	2.14389	4.43649e-06	0.727119	46.5 - 53.3	45.9 - 54.1	59.9	28.5 - 91.4	PLHT10.1
W22×TIL03	PROL	1@40.8	1	40.8422	22.7313	28.4773	0.264884	-0.0152324	7.38471e-23	0.814712	40.5 - 42.2	39.6 - 43.4	23.6	23 - 25.8	PROL1.1
W22×TIL01	PROL	1@41.1	1	41.0959	23.2556	28.4307	0.224948	-0.0337784	2.5126e-23	0.506229	40.8 - 42.5	40.8 - 42.5	23.6	23.6 - 25	PROL1.1
W22×TIL03	PROL	2@31.0	2	31	5.61077	6.03151	0.11714	-0.181819	1.59311e-06	0.00750022	28 - 36.6	21.5 - 37.2	9.6	5.9 - 12	PROL2.1
W22×TIL03	PROL	3@133.8	3	133.754	5.39083	5.78396	0.103644	0.0831606	5.04449e-06	0.296721	132.7 - 138.3	130.1 - 148.8	214.8	212.4 - 222.4	PROL3.1
W22×TIL01	PROL	3@139.5	3	139.464	7.02985	7.18726	0.111092	-0.160549	7.93875e-08	0.00326434	137.8 - 144.3	137.6 - 144.6	218.3	217.1 - 220.9	PROL3.1
W22×TIL11	PROL	5@75.4	5	75.4172	9.11049	17.5069	0.0669907	0.225694	0.000340596	2.93e-06	72.4 - 76.3	71.9 - 76.4	69.1	48.3 - 72.9
W22×TIL01	PROL	6@35.0	6	35.0249	4.71911	4.70717	0.081084	-0.132465	1.34131e-05	0.0240789	28.3 - 36.2	21.3 - 37.8	91.5	29.6 - 95
W22×TIL01	PROL	10@98.4	10	98.4202	5.39937	5.42487	0.0387581	0.243862	0.0465557	7.62206e-05	96.6 - 100.1	95.6 - 100.4	146	145.2 - 146.4
W22×TIL03	REPE	1@66.2	1	66.2229	7.67515	9.25192	-0.126359	0.277078	8.68954e-08	0.000600103	64.7 - 69.5	64.4 - 70.8	49	46.4 - 53.8	REPE1.1
W22×TIL03	REPE	4@63.9	4	63.898	11.574	14.4365	0.185742	0.0295037	1.45642e-11	0.608796	62 - 64.2	62 - 64.4	77.4	60.3 - 79.2	REPE4.1
W22×TIL25	REPE	4@71.7	4	71.7078	6.7946	8.11096	0.170035	-0.0415433	1.92306e-07	0.484867	68.1 - 73.6	67.3 - 73.8	153.4	128.5 - 156.8	REPE4.1
W22×TIL14	REPE	4@96.0	4	96	22.0523	29.6875	0.661391	-0.460755	9.38798e-22	0.000635566	95.4 - 96.2	95.4 - 96.5	189	188.8 - 189.1	REPE4.2
W22×TIL03	REPE	4@102.1	4	102.108	4.48168	5.25477	0.117055	-0.043266	8.50647e-06	0.506451	98.3 - 107.3	94.9 - 108.1	194.2	188.6 - 203.6	REPE4.2
W22×TIL01	REPE	6@79.4	6	79.4415	20.896	35.0481	0.413719	-0.229753	3.55106e-22	0.00889356	79.1 - 80.8	79.1 - 80.8	146.9	146.9 - 150.3	REPE6.2
W22×TIL11	REPE	7@55.4	7	55.3853	4.0976	8.25573	-0.0933477	-0.063829	0.000101065	0.290279	47 - 63.1	46.9 - 69	34.6	17.6 - 129.5
W22×TIL14	REPE	7@97.9	7	97.9242	6.7536	7.76589	0.568174	-0.73089	2.53706e-07	7.7966e-05	97.8 - 98.1	97.8 - 98.1	163.5	163.5 - 163.7
W22×TIL25	REPE	9@18.6	9	18.585	7.33923	8.79725	0.0691736	0.331556	0.00378268	1.70382e-05	15.8 - 19.4	15.5 - 19.4	7.2	5.3 - 7.4	REPE9.1
W22×TIL14	REPE	9@87.3	9	87.2702	6.71975	7.72435	0.0919172	0.164014	5.61552e-05	0.0094448	86.9 - 89.8	86.9 - 90.8	138.4	138.4 - 140.1
W22×TIL25	REPE	9@89.8	9	89.8277	4.75132	5.58518	-0.0156433	0.267673	0.462297	4.08478e-06	88.6 - 91.5	87.6 - 91.7	139.5	138.7 - 140.4
W22×TIL25	SHN	1@119.7	1	119.667	5.18224	4.0411	0.146869	1.20837	0.0914099	1.94243e-06	119.2 - 120.2	119.2 - 120.2	257.3	256.2 - 257.7
W22×TIL14	SHN	1@121.1	1	121.08	6.08756	8.96215	0.184504	1.72143	0.569977	2.2742e-07	121 - 121.4	121 - 121.4	257.8	259 - 257.8
W22×TIL25	SHN	1@152.7	1	152.718	5.63852	4.41203	-0.0918614	0.132454	1.92569e-06	0.00761412	150.1 - 153.3	147 - 155	291.1	286.4 - 292.2
W22×TIL25	SHN	2@122.0	2	122	12.6122	10.4056	0.144959	-0.108597	8.51643e-14	0.0245467	119.5 - 122.5	118.5 - 122.5	216.1	213.5 - 216.2	SHN2.1
W22×TIL25	SHN	3@102.4	3	102.354	10.523	8.54442	0.167293	-0.161812	1.04342e-11	0.00162065	102 - 103.7	102 - 105.9	184	184 - 187.3	SHN3.1
W22×TIL01	SHN	4@45.2	4	45.2056	4.90067	10.7726	0.152212	-0.0576663	2.79347e-06	0.58682	40.8 - 47.4	40.1 - 52.1	20.5	17.7 - 29	SHN4.1
W22×TIL14	SHN	4@68.3	4	68.313	4.51638	6.54437	0.0982979	-0.0492051	8.49098e-06	0.257878	66.7 - 70.2	65.1 - 70.7	134.8	85.6 - 149.1
W22×TIL11	SHN	5@54.4	5	54.4025	7.71664	15.3663	0.203478	0.0109867	6.97e-09	0.917812	52.6 - 56.5	52.4 - 58	16.8	15.7 - 19	SHN5.1
W22×TIL25	SHN	6@100.7	6	100.709	14.1472	11.8104	0.120977	0.130892	8.68072e-11	0.00286359	100.3 - 101.5	98.1 - 101.5	163.4	162.5 - 163.8	SHN6.1
W22×TIL03	STAM	1@63.5	1	63.4788	5.27506	5.88195	0.0672046	0.0251858	5.21739e-06	0.561801	61.3 - 64.5	60.3 - 68.8	45.6	41.8 - 52.2	STAM1.1
W22×TIL25	STAM	1@67.5	1	67.4575	8.21041	6.70789	0.079436	-0.0541387	1.98294e-09	0.0707126	65.2 - 69.5	65.2 - 69.5	51.4	47.1 - 53.6	STAM1.1
W22×TIL11	STAM	1@68.4	1	68.3625	16.1675	15.1016	0.831876	1.89947	3.17e-16	0.00111317	68.3 - 68.6	68.3 - 68.6	51.9	51.9 - 52	STAM1.1
W22×TIL11	STAM	1@111.9	1	111.922	10.6697	9.38102	0.163861	-0.195969	2.14e-11	0.000571695	111 - 113	110.5 - 113.5	239.5	234.4 - 244.1
W22×TIL01	STAM	1@131.1	1	131.067	11.3036	12.7044	0.274298	-0.172109	2.74674e-12	0.0182817	130 - 132.2	130 - 132.2	271.9	270.3 - 273.7	STAM1.2
W22×TIL25	STAM	1@140.6	1	140.623	13.8138	11.7788	0.090685	0.0590565	3.03205e-11	0.0465456	139.6 - 141.6	137.7 - 141.7	282	279.9 - 283.2
W22×TIL01	STAM	1@179.4	1	179.444	6.55579	7.00515	0.0082546	0.35502	0.68395	1.86548e-07	176.1 - 181.9	176.1 - 182.1	304.5	303.2 - 305.6
W22×TIL03	STAM	2@142.5	2	142.525	5.18239	5.77399	0.063518	-0.120096	1.0884e-05	0.00405713	140.2 - 151.7	139.6 - 153.5	229.9	227.3 - 237
W22×TIL14	STAM	3@31.3	3	31.2834	6.22478	7.31665	0.0303319	0.142122	0.00853506	5.57091e-05	30.6 - 33	30.6 - 33.2	7.1	6.9 - 8.1
W22×TIL03	STAM	3@80.4	3	80.4115	9.1238	10.52	0.119184	-0.0916925	2.15614e-10	0.0552939	78.1 - 90.2	77.5 - 92.6	137.6	122 - 172.3	STAM3.1
W22×TIL01	STAM	3@85.8	3	85.7835	9.87094	10.9254	0.413681	-0.424894	1.47961e-10	0.00145194	85.6 - 86.2	85.6 - 86.2	157.7	157.6 - 158.6	STAM3.1
W22×TIL25	STAM	3@86.0	3	86.0156	8.44457	6.91146	0.0785373	-0.0952148	2.04772e-09	0.00666298	82.4 - 86.8	80.6 - 86.8	158.6	138.4 - 160.3	STAM3.1
W22×TIL01	STAM	3@87.3	3	87.2589	5.17567	5.45061	-0.317464	0.347581	6.50117e-06	0.00753847	87.1 - 88.2	87.1 - 88.2	161.3	161 - 161.5
W22×TIL01	STAM	3@93.7	3	93.6693	6.38686	6.81248	0.18287	-0.191706	2.50437e-07	0.00437381	93.3 - 94.4	93 - 94.4	173.5	172.6 - 174.5	STAM3.2
W22×TIL14	STAM	3@99.6	3	99.6192	9.63779	11.7273	0.100278	-0.164252	5.90772e-10	1.61874e-05	98 - 99.8	98 - 100.5	181.5	179.4 - 182.3
W22×TIL25	STAM	4@109.2	4	109.208	7.26972	5.89721	0.134848	-0.133385	1.66336e-08	0.000289198	109 - 110.9	105.1 - 111.9	206.4	199.3 - 213.6
W22×TIL25	STAM	5@14.1	5	14.0649	5.04337	4.02308	-0.297746	-0.0999438	5.65439e-05	0.0160101	13.9 - 14.1	13.9 - 14.4	2.6	2.6 - 2.7
W22×TIL11	STAM	5@31.1	5	31.0754	14.9711	13.7999	-0.0066858	0.50841	0.684293	1.25e-15	30.7 - 32.5	29.8 - 32.5	7.1	6.8 - 7.4
W22×TIL14	STAM	5@87.2	5	87.2099	11.835	14.7283	0.153049	-0.983021	0.0157983	4.65665e-12	87.1 - 87.2	87.1 - 87.2	162.4	162.3 - 162.6
W22×TIL03	STAM	6@90.8	6	90.8277	6.48283	7.30476	0.00368177	0.247157	0.806179	2.24399e-07	87.2 - 93	85 - 93	159.1	154.8 - 159.8
W22×TIL11	STAM	7@68.6	7	68.6082	11.79	10.4936	0.0196156	-0.071991	0.743706	2.51e-12	68.5 - 68.7	68.5 - 68.7	128.8	128.6 - 128.8	STAM7.1
W22×TIL25	STAM	7@77.6	7	77.6198	6.57369	5.30462	0.0775257	-0.0805508	8.84239e-08	0.0300095	73.4 - 78.5	72.7 - 80.5	137.6	133 - 142.5	STAM7.1
W22×TIL03	STAM	9@54.9	9	54.8557	7.19601	8.1588	0.0936421	-0.12006	3.08524e-08	0.0108177	53 - 55	53 - 55	24	22.9 - 24.1
W22×TIL25	TBN	1@35.2	1	35.1797	9.90123	7.99122	1.87335	1.61858	2.29193e-08	0.0476822	34.6 - 35.7	34.3 - 36.5	18	17.2 - 19.3	TBN1.1
W22×TIL01	TBN	1@147.0	1	147.002	4.73761	5.24556	-2.04607	4.6581	6.93643e-05	0.00104361	144.1 - 147.9	138.3 - 152.5	286.4	280.3 - 291.1
W22×TIL25	TBN	2@76.2	2	76.2097	11.0275	8.97721	-1.70415	-1.98809	1.03703e-09	0.00666756	75.1 - 79.9	75.1 - 81.5	57.6	56.7 - 85.3	TBN2.1
W22×TIL01	TBN	3@9.6	3	9.63466	4.30874	4.7493	1.76873	-2.18376	2.9829e-05	0.0496172	5.4 - 13.6	5.4 - 16.9	1.5	0.2 - 2.8
W22×TIL03	TBN	3@86.5	3	86.4755	4.7466	6.78107	2.55125	-5.25393	3.28378e-05	0.00106671	83.4 - 91.2	83.2 - 91.2	159.1	150.7 - 169.3
W22×TIL25	TBN	3@138.4	3	138.411	6.50915	5.11974	-1.75352	-0.269494	3.02527e-07	0.777007	135.5 - 145.4	135.1 - 146.2	217.5	215.7 - 221.2
W22×TIL11	TBN	5@72.8	5	72.8078	5.56118	7.4902	-2.36227	2.74153	1.15e-06	0.0154746	71.1 - 74.5	71.1 - 74.5	55.6	43.5 - 64
W22×TIL25	TBN	5@89.3	5	89.271	6.65132	5.23719	2.28373	-1.1079	8.62294e-08	0.345134	85.7 - 92.5	85.7 - 93.9	167.6	154.6 - 173.9	TBN5.1
W22×TIL03	TBN	5@90.5	5	90.5085	7.35549	10.7487	-3.14537	-0.729913	2.25434e-07	0.564757	85.8 - 95.1	85.4 - 95.1	168.8	154.2 - 175.8	TBN5.1
W22×TIL25	TBN	6@15.4	6	15.4387	5.99903	4.70032	1.08997	3.50167	0.00124459	0.000890704	14 - 20.3	14 - 21.6	7.1	4.9 - 29.7
W22×TIL25	TBN	6@84.2	6	84.2495	9.28374	7.45764	2.07031	-0.792931	2.03043e-10	0.327583	83.5 - 85.3	81.4 - 85.3	153.5	151.1 - 154.9
W22×TIL14	TBN	6@118.9	6	118.942	6.049	8.82907	-2.78524	0.533455	3.14122e-07	0.72441	117 - 127.3	116.8 - 127.3	169.2	168.7 - 173.3	TBN6.2
W22×TIL01	TBN	6@120.8	6	120.832	7.4213	8.45277	2.42221	1.81273	1.58451e-07	0.227794	120 - 127.3	120 - 127.3	169.6	169.5 - 173.3	TBN6.2
W22×TIL01	TBN	7@63.3	7	63.3438	4.26777	4.70213	1.69539	1.0208	6.75322e-05	0.320005	60.6 - 69.6	56.6 - 71.1	114.1	53.8 - 131.1	TBN7.1
W22×TIL11	TBN	7@76.1	7	76.119	19.5726	30.7444	4.52323	0.424164	3.86e-20	0.738739	75.2 - 77	70.8 - 77	136.7	130.7 - 137.3	TBN7.2
W22×TIL14	TBN	7@78.5	7	78.4858	8.329	12.447	3.3787	0.934169	8.06741e-09	0.540012	78 - 84.6	77.6 - 85.5	138.9	138 - 146.4	TBN7.2
W22×TIL01	TBN	7@92.6	7	92.568	6.15788	6.92074	2.18082	-0.607684	2.42689e-07	0.594766	89.3 - 98.3	89 - 98.4	158.6	151.4 - 164.2	TBN7.3
W22×TIL01	TBN	8@40.3	8	40.2653	7.44999	8.48802	1.9344	3.08392	9.67974e-06	0.00777072	39 - 40.5	39 - 44	18.6	17.8 - 21.3	TBN8.1
W22×TIL14	TBN	8@61.0	8	60.9931	4.63861	6.67301	2.69233	-0.22314	1.56859e-05	0.858841	58.6 - 63.3	40.5 - 63.6	104	19.1 - 112.6	TBN8.1
W22×TIL25	TBN	9@108.5	9	108.536	4.20438	3.24988	-1.26676	0.169348	2.38767e-05	0.830176	105.6 - 112.5	104.6 - 113	150.3	148 - 152.2
W22×TIL14	TBN	10@74.7	10	74.6884	4.49495	6.45683	-2.77722	-0.873572	4.67923e-05	0.614508	68.9 - 78.9	68.5 - 79.8	137.7	134.5 - 140	TBN10.1
W22×TIL25	TILN	1@39.5	1	39.4718	14.6439	11.8853	-0.398728	-0.0339128	1.50951e-14	0.764468	37.2 - 40.5	35.6 - 40.5	22.4	18.2 - 23.5	TILN1.1
W22×TIL25	TILN	1@95.6	1	95.5685	15.9371	13.0649	0.460132	0.194337	3.69684e-13	0.126521	84.9 - 96.5	84.3 - 96.9	204.2	175.8 - 206.9
W22×TIL14	TILN	1@128.7	1	128.716	12.1696	10.694	0.66964	-0.428805	5.694e-12	0.00108774	128.5 - 129	128.5 - 129.1	267.4	267.3 - 268.8	TILN1.3
W22×TIL14	TILN	2@60.9	2	60.8553	11.495	10.0318	0.210126	0.377274	4.66138e-08	0.000856412	59.5 - 61.4	59 - 61.4	31	30.4 - 31.8	TILN2.1
W22×TIL03	TILN	2@67.1	2	67.1419	11.0943	10.4468	0.278685	0.278806	1.72981e-09	0.0343094	66.9 - 68	66.5 - 68.1	40.4	39.5 - 41.4
W22×TIL25	TILN	2@91.2	2	91.1992	7.14695	5.47715	0.192491	0.235897	1.25555e-06	0.0345996	90 - 92.9	89.9 - 95.7	174.1	168.4 - 185.9	TILN2.2
W22×TIL01	TILN	2@95.4	2	95.3708	5.53234	9.23277	0.269036	0.208272	5.8622e-06	0.22488	90.2 - 97	89.7 - 98.1	185.6	168 - 189.4	TILN2.2
W22×TIL11	TILN	2@100.5	2	100.492	8.09438	7.50794	0.229894	-0.503326	2.98e-07	9.05e-05	100.3 - 103.5	100 - 103.9	191.8	191.3 - 194.5
W22×TIL11	TILN	2@129.3	2	129.295	4.41091	3.93258	-0.206452	0.0737875	1.74e-05	0.542267	125.8 - 130.4	125.8 - 136.1	221.4	218.5 - 224.6
W22×TIL11	TILN	3@16.8	3	16.773	4.01825	3.56752	-0.146563	-0.114612	0.000212319	0.294987	12.6 - 24.5	11.5 - 24.6	2.8	1.9 - 4.8
W22×TIL14	TILN	3@55.5	3	55.546	8.47502	7.1727	-0.291516	0.278278	2.98122e-09	0.0139036	54.2 - 57.5	54.2 - 57.9	21	19.8 - 22.9
W22×TIL03	TILN	3@78.2	3	78.2249	12.9278	12.3717	0.376638	-0.25223	4.94186e-14	0.0398814	77.5 - 78.4	77.4 - 78.5	126.2	122 - 127.6
W22×TIL14	TILN	3@79.9	3	79.9248	4.92043	4.0181	0.3116	-0.262167	4.7567e-06	0.0205306	76.8 - 80.9	76 - 83.1	136.9	99.2 - 150.5	TILN3.2
W22×TIL11	TILN	3@81.0	3	81.0407	8.0851	7.49858	0.338574	-0.307833	5.17e-09	0.0214557	79.3 - 82	79.3 - 82	139.5	132.2 - 146.3	TILN3.2
W22×TIL25	TILN	3@84.2	3	84.1712	8.0783	6.23484	0.201853	0.45956	4.38148e-05	0.000783776	82.5 - 84.9	82.3 - 86.2	153.4	147.8 - 158.6	TILN3.2
W22×TIL25	TILN	3@146.8	3	146.842	7.75588	5.97135	-0.258251	-0.0541197	1.37977e-08	0.718816	144.9 - 149.9	144.6 - 150.9	221.4	220.9 - 223.4
W22×TIL03	TILN	4@50.7	4	50.7433	4.42295	3.92953	0.16276	0.0353146	2.36465e-05	0.697541	46.3 - 54.2	42.6 - 56.4	27.6	19.2 - 36.8
W22×TIL11	TILN	4@62.2	4	62.1763	6.2848	5.71686	0.23594	-0.0144403	6.7e-07	0.901006	56.5 - 62.4	56.1 - 72.1	61	36.6 - 154.1
W22×TIL03	TILN	4@114.9	4	114.902	9.05564	8.37595	0.221954	0.314466	8.53245e-07	0.00613604	114.2 - 116.3	112.8 - 116.3	220.5	215.9 - 225.4
W22×TIL14	TILN	5@83.1	5	83.1183	7.17957	5.99739	0.27861	-0.316347	4.19776e-08	0.00102845	82.1 - 84	81.6 - 84.2	142.7	130 - 148.6	TILN5.1
W22×TIL14	TILN	6@23.8	6	23.8436	14.1714	12.7116	0.301283	-0.0557246	2.50567e-14	0.528926	22 - 24.5	22 - 24.5	36.5	31.1 - 39.8	TILN6.1
W22×TIL01	TILN	7@28.3	7	28.2596	8.50704	14.6509	0.342196	-0.0126549	8.0975e-10	0.939801	26.3 - 32.3	26.1 - 32.3	6.1	5.7 - 7.9	TILN7.1
W22×TIL25	TILN	7@28.4	7	28.4242	8.85785	6.87717	0.252699	0.344592	3.9189e-07	0.0146195	27.9 - 29.9	27.4 - 29.9	6.3	5.8 - 6.5	TILN7.1
W22×TIL11	TILN	7@32.1	7	32.0552	12.586	12.2596	0.275579	-0.172478	3.45e-13	0.106812	30.2 - 36.2	30.2 - 36.4	7.9	6.7 - 9.5	TILN7.1
W22×TIL11	TILN	8@65.9	8	65.941	7.64335	7.05513	0.231232	0.17898	2.77e-07	0.154023	62.1 - 66.8	58.2 - 67	120	92.3 - 122.8
W22×TIL03	TILN	8@70.7	8	70.6809	4.29092	3.80788	0.187396	0.035177	9.21039e-05	0.714734	69.6 - 73.4	65.4 - 73.9	133.3	117.2 - 142.7	TILN8.1
W22×TIL25	TILN	8@72.5	8	72.4548	12.3978	9.8897	0.336969	-0.235204	1.64502e-13	0.0544363	71.5 - 73.3	70.9 - 74.6	137.3	134.1 - 143.9	TILN8.1
W22×TIL14	TILN	8@85.8	8	85.8004	9.6744	8.28789	0.240032	-0.206788	1.71214e-10	0.0149401	72 - 88.5	72 - 89.2	161.1	136.8 - 164	TILN8.1
W22×TIL11	TILN	9@72.2	9	72.1614	7.29182	6.70517	-0.284576	0.284135	3.61e-08	0.0213773	70.5 - 73.2	70.4 - 75.3	114.8	110.9 - 120.8
W22×TIL03	TILN	10@45.9	10	45.8625	7.66566	7.00477	0.260182	-0.141454	7.0051e-09	0.298418	45.4 - 49	44.7 - 49	28.2	25.3 - 75.6	TILN10.1
W22×TIL11	TILN	10@84.8	10	84.7711	7.24472	6.65848	0.243978	-0.523626	4.66e-07	0.000395365	84.6 - 86.4	82.1 - 86.8	142.1	140.7 - 142.6	TILN10.2
W22×TIL14	TILN	10@103.4	10	103.401	7.12525	5.94876	0.195543	0.128112	1.35598e-06	0.190573	101 - 104.4	98.5 - 105	147.4	146 - 147.9	TILN10.2
W22×TIL25	YEPE	1@35.9	1	35.9393	4.18136	3.44319	-0.110009	0.0776074	1.7575e-05	0.193417	27.5 - 37	27 - 45.4	18.3	11.2 - 27.4
W22×TIL11	YEPE	1@89.7	1	89.6709	4.68894	6.97524	-0.124417	-0.239686	0.00062987	0.0233091	79.5 - 90.9	72 - 92.8	187.1	56.1 - 199	YEPE1.1
W22×TIL14	YEPE	2@83.5	2	83.4842	5.05441	6.65184	-0.150884	-0.115517	2.90748e-05	0.204857	80.2 - 86.6	79.9 - 93.6	132	73.2 - 183.3
W22×TIL25	YEPE	3@23.5	3	23.4973	11.7582	10.2544	-0.171615	0.0177787	1.29262e-12	0.789935	23.2 - 26.6	23.1 - 26.8	4.5	4.4 - 5.5	YEPE3.1
W22×TIL01	YEPE	3@78.8	3	78.843	4.241	6.27703	-0.130677	0.25785	7.35131e-05	0.0108208	75.4 - 83.1	68.7 - 83.4	128.8	58.7 - 150.9	YEPE3.2
W22×TIL01	YEPE	4@17.7	4	17.6571	4.60798	6.84647	-0.12693	0.00625951	7.34838e-06	0.948046	7.3 - 25.3	6.5 - 35.1	5.7	1.5 - 12.7
W22×TIL03	YEPE	4@49.5	4	49.4849	7.14444	7.35043	-0.16305	-0.0472381	8.27127e-08	0.499861	47.7 - 52.5	47.4 - 54.2	25	23.1 - 32.8	YEPE4.1
W22×TIL25	YEPE	5@143.8	5	143.806	5.53982	4.60866	-0.173531	0.130559	7.77916e-07	0.320083	142.3 - 144.6	142.3 - 147.3	215.6	214.7 - 217.3
W22×TIL25	YEPE	6@25.3	6	25.2851	11.4222	9.93576	-0.176586	-0.0815973	1.92319e-10	0.240338	23.7 - 25.8	23.1 - 25.8	45.2	35.2 - 45.6
W22×TIL11	YEPE	6@30.2	6	30.1502	7.81608	12.0245	-0.268052	0.229058	3.86e-09	0.0107324	27.3 - 32.2	26.7 - 32.5	81.7	47.6 - 89	YEPE6.1
W22×TIL03	YEPE	6@31.1	6	31.1062	17.6952	19.9827	-0.274645	-0.01178	1.69379e-18	0.901346	30.3 - 33.2	30.2 - 33.7	85.7	81.8 - 91	YEPE6.1
W22×TIL14	YEPE	6@34.2	6	34.1954	13.0935	18.6941	-0.292456	0.152208	2.34024e-14	0.079935	33.2 - 34.9	31.9 - 37.2	91.3	88.2 - 92.7	YEPE6.1
W22×TIL01	YEPE	6@81.8	6	81.8402	4.76898	7.09766	-0.104353	-0.267954	0.010714	0.00518247	80.7 - 83.4	80.6 - 83.9	151.1	149.9 - 153.2
W22×TIL01	YEPE	7@43.4	7	43.4424	6.07191	9.1615	-0.156384	0.0625918	2.24168e-07	0.384188	37.9 - 45.4	36.1 - 45.7	14.4	9.5 - 15.5	YEPE7.1
W22×TIL25	YEPE	7@61.3	7	61.2681	12.0654	10.547	-0.271714	0.121336	7.96796e-13	0.185283	59 - 63.4	59 - 63.4	110.5	98.4 - 114.1	YEPE7.2
W22×TIL11	YEPE	7@65.8	7	65.8096	6.27505	9.49476	-0.18607	0.105171	1.26e-07	0.225862	63.7 - 66.2	61.3 - 67.9	124.1	110.5 - 127.7	YEPE7.2
W22×TIL03	YEPE	8@88.3	8	88.2845	5.81663	5.91572	-0.141675	-0.0629187	1.11067e-06	0.427982	83.7 - 91.6	83.6 - 92	163.8	157.7 - 165
W22×TIL25	YEPE	9@88.3	9	88.3094	4.88564	4.04448	-0.111913	0.0411154	3.86481e-06	0.488019	82.6 - 89.6	82.2 - 96.8	139	132.5 - 143
W22×TIL03	YEPE	10@44.7	10	44.697	4.53752	4.56402	-0.142372	0.335996	6.50807e-05	0.00293186	42 - 47.7	42 - 49.8	25.3	15.9 - 76.5
W22×TIL14	YEPE	10@61.3	10	61.3353	6.55281	8.75437	-0.245118	0.275663	7.76198e-08	0.0112563	53.7 - 62.1	52.2 - 62.6	122.9	85.3 - 126.5	YEPE10.1

## Sheet: Table S4
Table S4 QTL hotspots detected in TeoNAM.
Hotspot	chr	Range (cM)	No. QTL	QTL
hs1-1	1	72 - 82	5	DTA1.2, DTS1.2, TBN1.2, TILN1.2, YEPE1.1
hs1-2	1	88 - 98	5	CULM1.1, DTS1.3, KRN1.2, LFWD1.1, PLHT1.1
hs1-3	1	103 - 119	5	ASI1.1, BARE1.1, DTS1.4, ED1.2, KW1.2
hs1-4	1	126 - 136	6	ED1.3, GLUM1.1, LFLN1.1, SHN1.1, STAM1.2, TILN1.3
hs2-1	2	88 - 104	7	CULM2.2, DTS2.1, ED2.3, KRN2.3, KW2.2, LFWD2.1, TILN2.2
hs3-1	3	80 - 89	5	CULM3.1, DTA3.1, STAM3.1, TILN3.2, YEPE3.2
hs3-2	3	137 - 149	5	ED3.2, EL3.2, GLUM3.2, KRN3.3, PROL3.1
hs4-1	4	50 - 70	10	ASI4.1, BARE4.2, BARE4.3, EB4.1, ED4.2, EL4.1, GLCO4.1, GLUM4.1, KW4.1, REPE4.1
hs5-1	5	65 - 82	9	CULM5.1, DTA5.2, ED5.2, EL5.1, GLUM5.1, KW5.2, LFWD5.1, PROL5.1, TILN5.1
hs5-2	5	84 - 93	5	BARE5.1, DTS5.2, ED5.3, KRN5.3, TBN5.1
hs6-1	6	26 - 41	5	CULM6.1, DTA6.1, DTS6.1, KRN6.1, YEPE6.1
hs6-2	6	73 - 88	7	CULM6.2, DTS6.2, ED6.1, EL6.2, LFLN6.2, LFWD6.2, REPE6.2
hs7-1	7	56 - 73	9	DTA7.1, DTS7.1, EB7.1, ED7.1, EL7.1, KRN7.1, LFLN7.1, TBN7.1, YEPE7.2
hs8-1	8	64 - 79	7	DTA8.1, DTS8.1, ED8.1, KRN8.1, KW8.1, PLHT8.1, TILN8.1
hs10-1	10	44 - 63	13	ASI10.1, BARE10.1, DTA10.1, DTS10.1, ED10.1, EL10.1, GLUM10.1, KRN10.1, KW10.1, LFLN10.1, PLHT10.1, TILN10.1, YEPE10.1

## Sheet: Table S5
Table S5 Joint QTL mapping results for eight common traits in TeoNAM plus BC2S3 population.
Trait	QTL in TeoNAM	DF	SS	MS	FValue	ProbF	LOD	R2	Peak marker	Chr	Peak (cM)	Support interval (cM)
DTA	DTA1.1	6	984.099	164.017	31.3298	3.94426e-36	35.404	0.0279859	S1_6157227	1	14.9823	9.6-15.1
DTA	DTA1.2	6	578.676	96.446	18.4228	6.3445e-21	20.1976	0.0164564	S1_120848546	1	78.8899	78.9-79.8
DTA		6	244.065	40.6776	7.77008	2.79943e-08	7.55293	0.00694076	S1_231389724	1	110.717	110.3-113.3
DTA		6	208.221	34.7035	6.62893	5.93205e-07	6.22679	0.00592141	S1_264172054	1	129.147	127.6-135.7
DTA	DTA1.3	6	434.684	72.4474	13.8386	1.83051e-15	14.7374	0.0123616	S1_285078282	1	151.554	151.3-152.5
DTA	DTA2.1	6	412.028	68.6714	13.1174	1.32317e-14	13.8784	0.0117173	S2_28315842	2	58.1928	55.8-60
DTA		6	315.042	52.5069	10.0297	6.14585e-11	10.2114	0.00895918	S2_170448584	2	91.8109	86.3-95.7
DTA	DTA2.2	6	227.495	37.9158	7.24254	1.15337e-07	6.93803	0.00646952	S2_219730557	2	137.94	134.3-138.6
DTA	DTA3.1	6	675.707	112.618	21.5118	1.36126e-24	23.8661	0.0192158	S3_159799846	3	87.4431	86-88
DTA	DTA3.2	6	400.324	66.7206	12.7447	3.67445e-14	13.4348	0.0113844	S3_198140104	3	117.314	116.1-120
DTA	DTA3.3	6	391.522	65.2537	12.4645	7.9182e-14	13.1014	0.0111342	S3_223090973	3	158.15	156.3-162.2
DTA		6	482.716	80.4527	15.3678	2.75747e-17	16.5595	0.0137275	S4_202550118	4	109.793	108.9-109.8
DTA	DTA4.2	6	259.696	43.2826	8.26769	7.32237e-09	8.13535	0.00738525	S4_237712221	4	143.692	141.3-143.7
DTA		6	281.579	46.9299	8.96438	1.11175e-09	8.95399	0.00800758	S5_4910272	5	22.6355	13.1-24.8
DTA	DTA5.1	6	221.124	36.854	7.03973	1.98412e-07	6.70243	0.00628835	S5_7120890	5	31.9947	30.5-39.5
DTA	DTA5.2	6	449.549	74.9249	14.3119	4.99746e-16	15.3013	0.0127843	S5_70683291	5	76.3132	75.4-76.8
DTA	DTA6.1	6	393.261	65.5434	12.5199	6.80431e-14	13.1672	0.0111836	S6_88065996	6	33.4548	26.2-34.1
DTA	DTA6.2	6	801.831	133.638	25.5271	2.45499e-29	28.61	0.0228025	S6_130527829	6	70.2263	69.3-71.3
DTA		6	229.98	38.3301	7.32167	9.33092e-08	7.03008	0.0065402	S6_157151299	6	96.3734	91.6-99.5
DTA		6	557.378	92.8963	17.7447	4.0668e-20	19.3907	0.0158508	S7_11140878	7	40.788	39.1-42.6
DTA	DTA7.2	6	666.196	111.033	21.2091	3.11087e-24	23.5071	0.0189453	S7_174574340	7	140.185	139.6-142
DTA	DTA8.1	6	2992.56	498.76	95.2713	2.88022e-105	104.541	0.0851027	S8_123512155	8	68.2765	68.2-68.3
DTA		6	297.365	49.5608	9.46693	2.84161e-10	9.54644	0.00845649	S9_23466465	9	54.2779	51.6-55.3
DTA	DTA9.1	6	871.088	145.181	27.732	6.29953e-32	31.2007	0.0247721	S9_115593649	9	73.4102	72.4-74.2
DTA	DTA10.1	6	7379.09	1229.85	234.921	1.84978e-226	225.733	0.209847	S10_94682495	10	54.3299	54.1-54.7
DTA	pop	5	1556.31	311.263	59.4563	8.72352e-58	57.0593	0.0442586
DTA	Model	155	24892.7	160.598	30.6769	0		0.707902
DTA	Error	1962	10271.4	5.23515
DTA	Corrected Total	2117	35164.1
ED		6	595.471	99.2452	21.7263	8.19891e-25	24.0862	0.0155387	S1_20115948	1	37.888	37.7-37.9
ED		6	448.611	74.7685	16.368	1.85374e-18	17.732	0.0117064	S1_52084822	1	68.7513	66.6-70.6
ED		6	276.209	46.0348	10.0777	5.48094e-11	10.2611	0.00720761	S1_202647173	1	96.1733	94.4-97.1
ED	ED1.2	6	174.962	29.1603	6.38362	1.14501e-06	5.94119	0.00456558	S1_236093936	1	111.938	107.5-117.8
ED	ED1.3	6	468.877	78.1462	17.1074	2.44971e-19	18.6109	0.0122352	S1_260514645	1	127.621	127.6-128.1
ED		6	196.028	32.6713	7.15225	1.48027e-07	6.82966	0.0051153	S1_298964903	1	179.443	174.7-180.8
ED	ED2.2	6	252.771	42.1284	9.22255	5.59415e-10	9.25227	0.00659599	S2_7744522	2	27.0729	20.4-32.4
ED		6	305.114	50.8523	11.1323	3.09479e-12	11.5094	0.00796188	S2_27501200	2	56.8693	54-59.1
ED	ED2.3	6	200.667	33.4445	7.32151	9.41265e-08	7.02629	0.00523636	S2_169145941	2	91.199	83.8-94.6
ED	ED2.4	6	209.428	34.9046	7.64114	3.99547e-08	7.39843	0.00546496	S2_206048048	2	117.878	110.5-124.3
ED		6	176.704	29.4506	6.44718	9.67491e-07	6.01435	0.00461104	S2_222089512	2	140.923	136.8-147.9
ED		6	320.95	53.4917	11.7101	6.38847e-13	12.1946	0.00837511	S3_15056259	3	48.455	46.4-59.1
ED		6	342.796	57.1326	12.5072	7.22785e-14	13.141	0.00894517	S3_199826966	3	119.574	118-121.9
ED	ED3.2	6	157.259	26.2099	5.73773	6.28866e-06	5.20144	0.00410364	S3_214795183	3	140.112	132.1-144.6
ED		6	159.431	26.5718	5.81697	5.10742e-06	5.2918	0.00416031	S3_222752864	3	157.519	154-160.4
ED	ED4.1	6	334.293	55.7156	12.197	1.68837e-13	12.7725	0.00872331	S4_6946235	4	23.799	22.5-26.2
ED		6	751.019	125.17	27.4016	1.73916e-31	30.7597	0.0195977	S4_28330072	4	52.5623	52-53.2
ED		6	363.314	60.5524	13.2558	9.31673e-15	14.0307	0.0094806	S4_175127153	4	87.1099	85.7-90.4
ED		6	271.879	45.3132	9.91974	8.42335e-11	10.0745	0.00709462	S4_236382096	4	136.676	134.8-143
ED	ED5.1	6	382.949	63.8248	13.9722	1.3104e-15	14.8826	0.00999296	S5_12273089	5	45.2762	43.4-46.4
ED	ED5.2	6	312.668	52.1113	11.408	1.45838e-12	11.8361	0.00815899	S5_56426644	5	73.3068	71.8-74.2
ED		6	713.973	118.996	26.0499	6.65646e-30	29.1768	0.018631	S5_159326418	5	87.5526	86.9-88.5
ED		6	265.764	44.2941	9.69664	1.54476e-10	9.81114	0.00693506	S5_192212144	5	114.743	108.4-120.5
ED	ED6.1	6	221.914	36.9856	8.09672	1.17348e-08	7.93052	0.00579079	S6_148777005	6	83.647	81.5-84.9
ED	ED6.2	6	309.536	51.5893	11.2937	1.99237e-12	11.7006	0.00807727	S6_159693855	6	101.725	98.1-102.1
ED		6	337.163	56.1938	12.3017	1.26803e-13	12.8969	0.00879818	S7_124155669	7	68.2345	64.5-71.5
ED	ED7.2	6	683.44	113.907	24.9359	1.35215e-28	27.869	0.0178342	S7_155907893	7	94.7962	93.6-98.7
ED	ED8.1	6	497.619	82.9366	18.1561	1.39133e-20	19.8566	0.0129853	S8_133837804	8	72.6896	72.7-74.4
ED	ED8.2	6	195.713	32.6189	7.14076	1.52641e-07	6.81633	0.00510709	S8_159014986	8	88.5576	86.6-94.8
ED		6	167.638	27.9397	6.11643	2.32108e-06	5.63431	0.00437448	S8_172252775	8	129.87	117.9-132.3
ED	ED9.1	6	332.163	55.3605	12.1192	2.08819e-13	12.6802	0.00866771	S9_27018521	9	58.401	52.4-59
ED		6	202.949	33.8248	7.40477	7.53142e-08	7.12312	0.00529591	S9_116262770	9	73.8577	72.4-76.6
ED		6	815.766	135.961	29.7639	3.05048e-34	33.5156	0.0212872	S10_63249655	10	47.6815	47.7-48.3
ED		6	236.246	39.3743	8.61964	2.86176e-09	8.54337	0.00616478	S10_145352120	10	99.2984	91.7-112.5
ED	Model	204	29720.4	145.688	31.8933	0		0.775546
ED	Error	1883	8601.51	4.56798
ED	Corrected Total	2087	38321.9
EL		6	67.1048	11.1841	6.20615	1.81925e-06	5.74011	0.00813813	S1_3131841	1	5.07081	0-10.5
EL		6	80.4639	13.4107	7.44167	6.75561e-08	7.17034	0.00975826	S1_21757761	1	39.1748	33.8-45.2
EL		6	63.6617	10.6103	5.88772	4.21564e-06	5.37514	0.00772057	S1_37531734	1	56.9634	57-57.4
EL		6	60.1353	10.0225	5.56158	9.92505e-06	5.00327	0.0072929	S1_39066326	1	58.1928	58-58.2
EL		6	182.674	30.4457	16.8945	4.15502e-19	18.3814	0.0221538	S1_214979894	1	104.424	103.2-106.5
EL	EL1.2	6	95.79	15.965	8.85909	1.47622e-09	8.83085	0.0116169	S1_286404666	1	153.748	151-155.3
EL		6	59.0306	9.83843	5.45941	1.29651e-05	4.88722	0.00715893	S2_15997041	2	44.7856	32.4-46.9
EL	EL2.1	6	127.785	21.2974	11.8181	4.63375e-13	12.3341	0.0154971	S2_44261590	2	71.2434	69.7-76.1
EL		6	67.9729	11.3288	6.28643	1.47097e-06	5.8324	0.0082434	S3_4708524	3	21.6135	16.6-28.3
EL	EL3.1	6	93.297	15.5495	8.62853	2.75635e-09	8.55967	0.0113146	S3_55445743	3	67.6517	65.9-74.1
EL	EL3.2	6	253.813	42.3022	23.4738	6.40199e-27	26.1937	0.0307812	S3_214859599	3	140.359	138.8-141.4
EL	EL4.1	6	231.769	38.6282	21.4351	1.6601e-24	23.7799	0.0281078	S4_53678226	4	61.4606	59.6-61.5
EL		6	77.9031	12.9839	7.20483	1.27441e-07	6.89469	0.00944769	S5_6444293	5	29.5524	25.8-32.9
EL	EL5.1	6	234.662	39.1103	21.7026	7.99857e-25	24.097	0.0284586	S5_67041678	5	75.3692	74.2-76.8
EL	EL6.1	6	98.789	16.4648	9.13645	6.95799e-10	9.15752	0.0119806	S6_29351092	6	21.9105	21-34.7
EL	EL6.2	6	135.504	22.584	12.532	6.55677e-14	13.1833	0.0164333	S6_133324354	6	73.0751	69.5-74.6
EL		6	103.344	17.224	9.55771	2.2155e-10	9.65453	0.012533	S6_166170370	6	123.307	119.2-130.4
EL	EL7.1	6	353.609	58.9349	32.7034	9.74179e-38	37.0114	0.0428839	S7_119922678	7	65.6552	65-66.2
EL		6	138.817	23.1362	12.8384	2.83108e-14	13.548	0.016835	S7_155907893	7	94.7962	90.8-96.2
EL	EL8.1	6	267.565	44.5942	24.7456	2.01608e-28	27.6955	0.0324489	S8_155076745	8	84.7654	83.9-84.8
EL	EL8.2	6	95.7011	15.9502	8.85087	1.50949e-09	8.82117	0.0116061	S8_172371696	8	130.985	126-135.9
EL		6	63.7637	10.6273	5.89715	4.11229e-06	5.38592	0.00773293	S9_16489456	9	42.4825	35.8-19.4
EL		6	234.763	39.1272	21.712	7.79556e-25	24.1082	0.0284709	S9_139377131	9	94.4662	86.8-95.5
EL	EL10.1	6	761.325	126.888	70.4108	1.13897e-79	78.9435	0.0923297	S10_114029187	10	58.4752	58.5-59.1
EL	Model	144	4688.37	32.5581	18.0667	1.05767e-266		0.568582
EL	Error	1974	3557.35	1.8021
EL	Corrected Total	2118	8245.73
GLCO	GLCO2.1	6	93.0657	15.5109	71.9326	1.20907e-81	80.9175	0.127031	S2_131427043	2	83.7564	82.7-84.6
GLCO	GLCO2.2	6	14.271	2.3785	11.0304	3.90977e-12	11.4078	0.0194794	S2_220646894	2	139.977	138.4-144.8
GLCO	GLCO2.3	6	25.7424	4.2904	19.8969	1.03402e-22	21.9855	0.0351373	S2_236484920	2	173.054	171.1-173.8
GLCO	GLCO4.1	6	40.6934	6.78223	31.4529	2.32004e-36	35.6345	0.0555448	S4_40345170	4	59.6143	59.1-59.6
GLCO	GLCO6.1	6	13.326	2.221	10.3	2.88022e-11	10.5406	0.0181894	S6_125190350	6	65.527	56.8-76.1
GLCO	GLCO7.1	6	10.9529	1.82548	8.46572	4.22841e-09	8.37382	0.0149502	S7_172936723	7	132.507	126.1-134.5
GLCO	GLCO8.1	6	10.8309	1.80515	8.37144	5.45735e-09	8.26302	0.0147837	S8_163181187	8	97.4322	89-105.1
GLCO	pop	5	39.2888	7.85776	36.4406	7.0643e-36	35.1509	0.0536275
GLCO	Model	47	286.266	6.09076	28.2461	2.08773e-186		0.390741
GLCO	Error	2070	446.358	0.215632
GLCO	Corrected Total	2117	732.623
GLUM	GLUM1.1	6	39.278	6.54634	26.7763	7.69836e-31	30.1136	0.0274789	S1_265521680	1	129.879	129.1-130.5
GLUM	GLUM2.1	6	16.2865	2.71442	11.1027	3.24481e-12	11.4888	0.011394	S2_4676366	2	17.1344	13.5-17.6
GLUM		6	11.4812	1.91354	7.82691	2.38706e-08	7.62214	0.00803229	S2_16548249	2	45.324	41.6-53.3
GLUM	GLUM2.2	6	11.7325	1.95541	7.99817	1.50463e-08	7.82257	0.00820805	S2_189637422	2	105.346	101.3-113.7
GLUM	GLUM3.1	6	12.4199	2.06998	8.4668	4.2435e-09	8.37228	0.00868897	S3_108386968	3	74.3549	61.4-80.5
GLUM	GLUM3.2	6	12.1967	2.03279	8.31466	6.40297e-09	8.19362	0.00853284	S3_217358612	3	145.125	145.1-147.4
GLUM	GLUM4.1	6	490.175	81.6958	334.158	5.52821e-298	297.257	0.342927	S4_40345170	4	59.6143	59.1-61.5
GLUM	GLUM4.2	6	12.027	2.0045	8.19897	8.75212e-09	8.05789	0.00841411	S4_199076926	4	107.903	105.3-114.5
GLUM		6	21.0493	3.50822	14.3496	4.40437e-16	15.3561	0.0147261	S5_151712392	5	86.1015	85.4-88.5
GLUM	GLUM7.1	6	11.3432	1.89053	7.73278	3.07544e-08	7.51209	0.00793569	S7_137518965	7	81.761	74.3-82.1
GLUM		6	16.9968	2.83281	11.587	8.62246e-13	12.0644	0.011891	S8_92445885	8	58.4645	55.8-61.7
GLUM		6	9.85667	1.64278	6.71941	4.64109e-07	6.33338	0.00689573	S9_136081017	9	87.6272	84.3-96.4
GLUM	GLUM10.1	6	12.8547	2.14246	8.76324	1.90168e-09	8.72086	0.00899318	S10_24693696	10	45.0013	40.7-50.5
GLUM	pop	5	30.8845	6.1769	25.2652	8.73407e-25	24.0588	0.0216068
GLUM	Model	83	935.777	11.2744	46.1155	0		0.65467
GLUM	Error	2019	493.61	0.244482
GLUM	Corrected Total	2102	1429.39
KRN	KRN1.1	6	128.429	21.4048	26.1126	5.18608e-30	29.2852	0.0217779	S1_33628671	1	52.3419	52.1-53.7
KRN	KRN1.2	6	105.209	17.5348	21.3914	1.93192e-24	23.714	0.0178405	S1_203713807	1	96.4783	96.5-97.1
KRN	KRN1.3	6	202.545	33.7576	41.1822	1.92617e-47	46.7153	0.034346	S1_292990325	1	165.649	165.1-166.3
KRN		6	52.8405	8.80676	10.7437	8.81459e-12	11.0548	0.00896026	S2_7745400	2	27.1892	20.1-28.5
KRN	KRN2.2	6	95.2218	15.8703	19.3608	4.9503e-22	21.3054	0.0161469	S2_24811358	2	55.4811	53.8-56.2
KRN	KRN2.3	6	56.7175	9.45292	11.532	1.02326e-12	11.99	0.00961769	S2_186186144	2	100.517	96.1-101.5
KRN		6	49.6723	8.27871	10.0995	5.10457e-11	10.292	0.00842302	S3_6684932	3	28.6052	21-32.5
KRN		6	42.3668	7.06114	8.61417	2.88003e-09	8.5406	0.00718422	S3_86917829	3	72.3235	67.3-77.9
KRN	KRN3.2	6	45.2158	7.53596	9.19343	5.99553e-10	9.22217	0.00766732	S3_170423731	3	93.2057	90.3-94.5
KRN		6	50.3134	8.38556	10.2299	3.57888e-11	10.4463	0.00853172	S3_208629470	3	129.729	127.4-133.8
KRN		6	112.914	18.819	22.958	2.70701e-26	25.5675	0.019147	S3_223309811	3	158.478	156.3-159.1
KRN	KRN4.1	6	28.2965	4.71608	5.75333	6.01531e-06	5.22074	0.00479828	S4_7313082	4	25.2996	17.7-35.1
KRN		6	52.3668	8.72779	10.6474	1.14646e-11	10.9406	0.00887992	S4_179648273	4	89.7517	88.4-92.8
KRN	KRN4.2	6	47.3885	7.89808	9.63519	1.80605e-10	9.74327	0.00803575	S4_199076926	4	107.903	104-110.7
KRN	KRN4.3	6	130.006	21.6677	26.4333	2.17796e-30	29.662	0.0220454	S4_236479062	4	138.514	136.6-141.9
KRN	KRN5.1	6	85.7072	14.2845	17.4263	9.87494e-20	19.0055	0.0145335	S5_2275300	5	12.2304	11.2-14.7
KRN	KRN5.2	6	56.969	9.49483	11.5831	8.89782e-13	12.0507	0.00966033	S5_13807502	5	48.7686	44.7-54.4
KRN	KRN5.3	6	182.317	30.3862	37.0693	9.63649e-43	42.0161	0.0309158	S5_164339714	5	89.7828	89.3-91.1
KRN	KRN5.4	6	33.8642	5.64403	6.88538	3.00214e-07	6.52257	0.00574241	S5_212999256	5	153.546	148.5-159.3
KRN	KRN6.1	6	50.1581	8.35969	10.1983	3.90027e-11	10.4089	0.0085054	S6_96126766	6	40.9063	38.1-43.3
KRN	KRN6.2	6	41.5159	6.91932	8.44116	4.59754e-09	8.33747	0.00703993	S6_158649455	6	99.5085	91.6-101.7
KRN	KRN7.1	6	80.0687	13.3448	16.2798	2.28646e-18	17.6408	0.0135774	S7_121544914	7	66.8308	65-67.8
KRN	KRN7.2	6	41.0919	6.84864	8.35493	5.80342e-09	8.23632	0.00696802	S7_155907893	7	94.7962	94.8-102.8
KRN		6	37.0518	6.1753	7.5335	5.2998e-08	7.27574	0.00628294	S8_72261141	8	55.5578	55.6-56.5
KRN	KRN8.1	6	36.0397	6.00661	7.3277	9.20282e-08	7.03608	0.00611131	S8_130101268	8	70.8511	66.2-74.4
KRN	KRN8.2	6	94.5148	15.7525	19.2171	7.33456e-22	21.1346	0.016027	S8_166079457	8	106.834	104.5-107.9
KRN	KRN9.1	6	61.5593	10.2599	12.5164	6.91844e-14	13.16	0.0104387	S9_15616086	9	39.7935	39.8-41.5
KRN		6	39.2872	6.54787	7.98801	1.56133e-08	7.80651	0.006662	S9_147733553	9	110.552	103.5-120
KRN	KRN10.1	6	88.3159	14.7193	17.9567	2.30966e-20	19.6365	0.0149759	S10_63249655	10	47.6815	47.7-50.8
KRN	pop	5	35.8505	7.17011	8.7471	3.23789e-08	7.48974	0.00607924
KRN	Model	179	4307.79	24.0658	29.3589	0		0.730479
KRN	Error	1939	1589.42	0.819712
KRN	Corrected Total	2118	5897.21
KW		6	0.0196167	0.00326946	9.28176	4.7232e-10	9.32576	0.00761811	S1_27394693	1	45.5733	44.4-46.5
KW	KW1.1	6	0.0117366	0.0019561	5.55323	1.0168e-05	4.99276	0.00455788	S1_29678443	1	48.0394	47.2-50.9
KW		6	0.0434859	0.00724766	20.5756	1.80127e-23	22.7444	0.0168877	S1_84746044	1	76.9649	73.9-80.8
KW	KW1.2	6	0.0265259	0.00442098	12.5509	6.31054e-14	13.1999	0.0103013	S1_226258243	1	108.944	108.9-110.7
KW		6	0.0148967	0.00248278	7.04845	1.94389e-07	6.71133	0.0057851	S1_281701788	1	148.274	143.7-154.5
KW		6	0.0168707	0.00281179	7.98247	1.58616e-08	7.79965	0.00655171	S2_3016898	2	9.37262	6.5-9.7
KW	KW2.1	6	0.0132998	0.00221663	6.29286	1.45062e-06	5.83845	0.00516494	S2_30817717	2	61.8537	46.9-64.9
KW		6	0.0249816	0.00416359	11.8202	4.6622e-13	12.3314	0.00970153	S2_78443255	2	80.8025	80.2-87.3
KW		6	0.0236307	0.00393845	11.181	2.67553e-12	11.5726	0.00917693	S2_209952960	2	122.786	120.8-130.4
KW		6	0.0196905	0.00328175	9.31666	4.29625e-10	9.36691	0.00764676	S3_2144440	3	9.1393	7.1-11.5
KW		6	0.0196602	0.0032767	9.30233	4.46666e-10	9.35002	0.007635	S3_158985271	3	87.0284	80.5-91.4
KW		6	0.0433155	0.00721924	20.4949	2.24503e-23	22.6488	0.0168215	S3_187339786	3	108.893	102.6-118
KW		6	0.0165678	0.0027613	7.83914	2.33297e-08	7.63209	0.00643407	S4_10250168	4	30.1335	24-32.6
KW	KW4.1	6	0.0473923	0.00789872	22.4239	1.16691e-25	24.933	0.0184047	S4_37297564	4	58.1677	57.1-59.6
KW	KW4.2	6	0.0264255	0.00440425	12.5034	7.18704e-14	13.1435	0.0102623	S4_167185554	4	82.8161	81.3-84.2
KW	KW5.1	6	0.0204489	0.00340816	9.67552	1.62059e-10	9.79033	0.0079413	S5_11904503	5	44.6521	40.2-48.9
KW		6	0.070899	0.0118165	33.5462	1.12606e-38	37.9484	0.0275335	S5_133505829	5	82.4028	80.3-82.4
KW		6	0.0185521	0.00309202	8.77803	1.85046e-09	8.73272	0.00720467	S5_208200494	5	139.404	132.5-144
KW	KW6.1	6	0.0418117	0.00696862	19.7834	1.56784e-22	21.8047	0.0162375	S6_145077857	6	80.2563	72.8-82.7
KW	KW6.2	6	0.022902	0.003817	10.8362	6.85962e-12	11.1637	0.00889394	S6_164869993	6	118.559	115.2-130.4
KW	KW7.1	6	0.0245457	0.00409096	11.6139	8.19431e-13	12.0865	0.00953228	S7_133178346	7	77.0639	75.1-82.1
KW	KW7.2	6	0.0335958	0.0055993	15.896	6.57336e-18	17.1822	0.0130469	S7_167980499	7	117.909	113-119.6
KW	KW8.1	6	0.0588362	0.00980603	27.8386	4.95124e-32	31.3053	0.0228489	S8_149610651	8	80.7147	76.6-81.7
KW	KW8.2	6	0.0314438	0.00524063	14.8778	1.07221e-16	15.9697	0.0122111	S8_164974026	8	102.942	95.2-103.1
KW	KW9.1	6	0.0130595	0.00217658	6.17917	1.95958e-06	5.70784	0.00507163	S9_18849058	9	46.1421	45-53.5
KW	KW9.2	6	0.0202136	0.00336893	9.56416	2.19348e-10	9.65887	0.0078499	S9_115593649	9	73.4102	71.1-78.3
KW		6	0.0264154	0.00440257	12.4986	7.28122e-14	13.1378	0.0102584	S9_136146396	9	87.8929	86.8-91.7
KW	KW10.1	6	0.0438008	0.00730014	20.7246	1.19938e-23	22.921	0.0170099	S10_84239827	10	51.9557	52-54.3
KW		6	0.0151298	0.00252163	7.15873	1.44762e-07	6.83934	0.00587561	S10_145352120	10	99.2984	92-100.6
KW	pop	5	0.0404937	0.00809875	22.9918	1.74402e-22	21.7584	0.0157257
KW	Model	179	1.89447	0.0105837	30.0463	0		0.735715
KW	Error	1932	0.680538	0.000352245
KW	Corrected Total	2111	2.57501
TILN	TILN1.1	6	25.5688	4.26147	25.4626	2.87924e-29	28.5407	0.014957	S1_23424075	1	41.2026	35.7-41.7
TILN		6	31.0687	5.17812	30.9397	1.0977e-35	34.9595	0.0181743	S1_200071567	1	94.6348	89.7-96.2
TILN	TILN1.3	6	15.4417	2.57362	15.3776	2.66896e-17	16.5737	0.00903296	S1_262550378	1	128.716	128.1-129.9
TILN	TILN2.1	6	21.9813	3.66354	21.89	4.79641e-25	24.3191	0.0128584	S2_28672359	2	58.4241	55.3-60.3
TILN	TILN2.2	6	16.6883	2.78138	16.6189	8.84947e-19	18.0531	0.00976214	S2_173768811	2	92.079	90.2-94.5
TILN		6	14.3998	2.39996	14.34	4.60403e-16	15.3369	0.00842344	S2_189502256	2	104.885	103.3-107.1
TILN	TILN2.3	6	8.76815	1.46136	8.73173	2.08447e-09	8.68101	0.00512911	S2_230918091	2	155.442	151.7-157.4
TILN	TILN3.1	6	9.48113	1.58019	9.44175	3.03655e-10	9.51762	0.00554618	S3_8265531	3	32.1283	29.4-35.6
TILN	TILN3.2	6	37.0114	6.16856	36.8576	1.53635e-42	41.8135	0.0216506	S3_138433106	3	80.9955	79.1-83.7
TILN	TILN3.3	6	16.4835	2.74726	16.4151	1.54824e-18	17.8102	0.00964239	S3_210673608	3	133.148	133.1-133.3
TILN		6	16.5725	2.76208	16.5036	1.21426e-18	17.9157	0.0096944	S4_162563189	4	79.3349	77.3-82.5
TILN		6	8.7264	1.4544	8.69015	2.33284e-09	8.63211	0.00510469	S4_231493679	4	124.252	119.8-127.5
TILN	TILN5.1	6	8.48768	1.41461	8.45243	4.43817e-09	8.3528	0.00496504	S5_33048789	5	69.2665	66.6-73.3
TILN		6	6.92748	1.15458	6.8987	2.88829e-07	6.53936	0.00405237	S5_167670487	5	91.5885	88.5-92.4
TILN	TILN5.2	6	8.54855	1.42476	8.51305	3.76719e-09	8.42398	0.00500065	S5_208091902	5	138.401	134-142.2
TILN		6	23.7889	3.96482	23.6901	3.55365e-27	26.4493	0.0139158	S6_86476784	6	32.9447	32.6-33.5
TILN		6	6.80818	1.1347	6.7799	3.96476e-07	6.40178	0.00398259	S6_160165130	6	104.161	103.4-106.9
TILN	TILN7.1	6	29.1779	4.86298	29.0567	1.73535e-33	32.7606	0.0170682	S7_6127905	7	29.5642	27.2-29.2
TILN		6	8.83316	1.47219	8.79647	1.74921e-09	8.75716	0.00516714	S7_133178346	7	77.0639	73.6-85.7
TILN	TILN8.1	6	20.1842	3.36403	20.1003	6.3719e-23	22.1957	0.0118071	S8_131529321	8	71.6085	70.4-72.7
TILN		6	7.8113	1.30188	7.77886	2.73036e-08	7.56378	0.00456938	S8_159095007	8	88.8275	84.3-92.2
TILN	TILN10.1	6	12.7771	2.12952	12.724	3.87393e-14	13.4118	0.00747423	S10_63249655	10	47.6815	46.8-51.1
TILN	TILN10.2	6	10.469	1.74484	10.4256	2.0838e-11	10.6811	0.00612407	S10_141958606	10	87.062	85.9-94.9
TILN	pop	5	121.579	24.3158	145.289	1.57175e-131	130.804	0.07112
TILN	Model	143	1379.12	9.64417	57.6247	0		0.806742
TILN	Error	1974	330.372	0.167362
TILN	Corrected Total	2117	1709.49
